# Supplementary material for: A dual biomimetic process for the selective aerobic oxidative coupling of primary amines using pyrogallol as a precatalyst. Isolation of the [5 + 2] cycloaddition redox intermediates
Source: Royal Society of Chemistry journal article supplement (doi:10.1039/c9gc03992a), 2020-01-01

## Supporting Information

### **A dual biomimetic process for the selective aerobic oxidative coupling of primary amines using pyrogallol as a pre-catalyst. Isolation of the [5+2] cycloaddition redox intermediates**

Martine LARGERON,\* Patrick Deschamps, Karim Hammad and Maurice-Bernard Fleury

*Université de Paris, CiTCoM, UMR 8038, CNRS, F-75006 Paris, France*

### Table of Contents

- I. Materials and methods
- II. Crystallographic studies for compounds **19red**, **24j** and **25d**
- III. References
- IV. <sup>1</sup>H NMR spectra and 1D proton-decoupled <sup>13</sup>C NMR spectra for all isolated products **18red**, **19red**, **24a-o** and **25a-o**. 2D NMR spectra (HMBC and HSQC) for compounds **18red** and **19red**

## I. Materials and methods

All reagents were purchased from commercial suppliers, Acros Organics, Alfa Aesar, Sigma Aldrich or TCI Europe, and used without further purification. Column chromatography was performed on silica gel 60 particle size 40-63 micron from Sigma Aldrich using the solvent system as stated. Mass spectra were recorded on a Q-ToF1 spectrometer, equipped with the negative electrospray mode (ES<sup>-</sup>). <sup>1</sup>H NMR and 1D proton decoupled <sup>13</sup>C NMR spectra were recorded on a Bruker Avance I spectrometer operating at 300 MHz and 75 MHz, respectively. Chemical shifts  $\delta$  are given in ppm relative to TMS and coupling constants  $J$ , in Hertz. The measurements were carried out using the standard pulse-sequences. The carbon type (methyl, methylene, methine, or quaternary) was determined by DEPT experiments. 2D experiments (HSQC and HMBC) were performed on a 400 MHz Bruker Avance III spectrometer or on a 600 MHz Bruker Avance I spectrometer using standard pulse sequences.

All cross-coupled imines are known: imine **24a**,<sup>1</sup> imine **24b**,<sup>2</sup> imine **24c**,<sup>2</sup> imine **24d**,<sup>2</sup> imine **24e**,<sup>3</sup> imine **24f**,<sup>3</sup> imine **24g**,<sup>3</sup> imine **24h**,<sup>3</sup> imine **24i**,<sup>4</sup> imine **24j**,<sup>2</sup> imine **24k**,<sup>3</sup> imine **24l**,<sup>3,5</sup> imine **24m**,<sup>2</sup> imine **24n**,<sup>6</sup> imine **24o**.<sup>7</sup>

All 1,2-substituted benzimidazoles are known: benzimidazole **25a**,<sup>8</sup> benzimidazole **25b**,<sup>9</sup> benzimidazole **25c**,<sup>9</sup> benzimidazole **25d**,<sup>8</sup> benzimidazole **25e**,<sup>8</sup> benzimidazole **25f**,<sup>9</sup> benzimidazole **25g**,<sup>3</sup> benzimidazole **25h**,<sup>9</sup> benzimidazole **25i**,<sup>9</sup> benzimidazole **25j**,<sup>9</sup> benzimidazole **25k**,<sup>9</sup> benzimidazole **25l**,<sup>9</sup> benzimidazole **25m**,<sup>9</sup> benzimidazole **25n**,<sup>9</sup> benzimidazole **25o**.<sup>9</sup>

## II. Crystallographic studies

Data were collected by using a VENTURE PHOTON100 CMOS Bruker diffractometer (Cu-K $\alpha$  radiation) controlled by APEX3 software package.<sup>10</sup> Data integration and global cell refinement were performed with the program SAINT.<sup>11</sup> Data were corrected for absorption by the multiscan semiempirical method implemented in SADABS.<sup>12</sup> The structure was solved by direct methods using SHELXS-97.<sup>13</sup>

Refinement, based on  $F^2$ , was carried out by full matrix least squares with SHELXL-2008 software.<sup>14</sup> All non hydrogen atoms were refined with anisotropic thermal parameters. The hydrogen atoms were located on a difference Fourier map and placed in their geometrically generated positions and allowed to ride on their parent atoms with an isotropic thermal parameter 20 % higher to that of the atom of attachment.

The crystal data collection and refinement parameters are given in Table S1. CCDC 1965257, CCDC 1981805, CCDC 1981802 contain the supplementary crystallographic data of compounds **19red**, **24j** and **25d**, respectively for this paper. These data can be obtained free of charge from the Cambridge Crystallographic Data Centre via <http://www.ccdc.cam.ac.uk/Community/Requestastructure>.

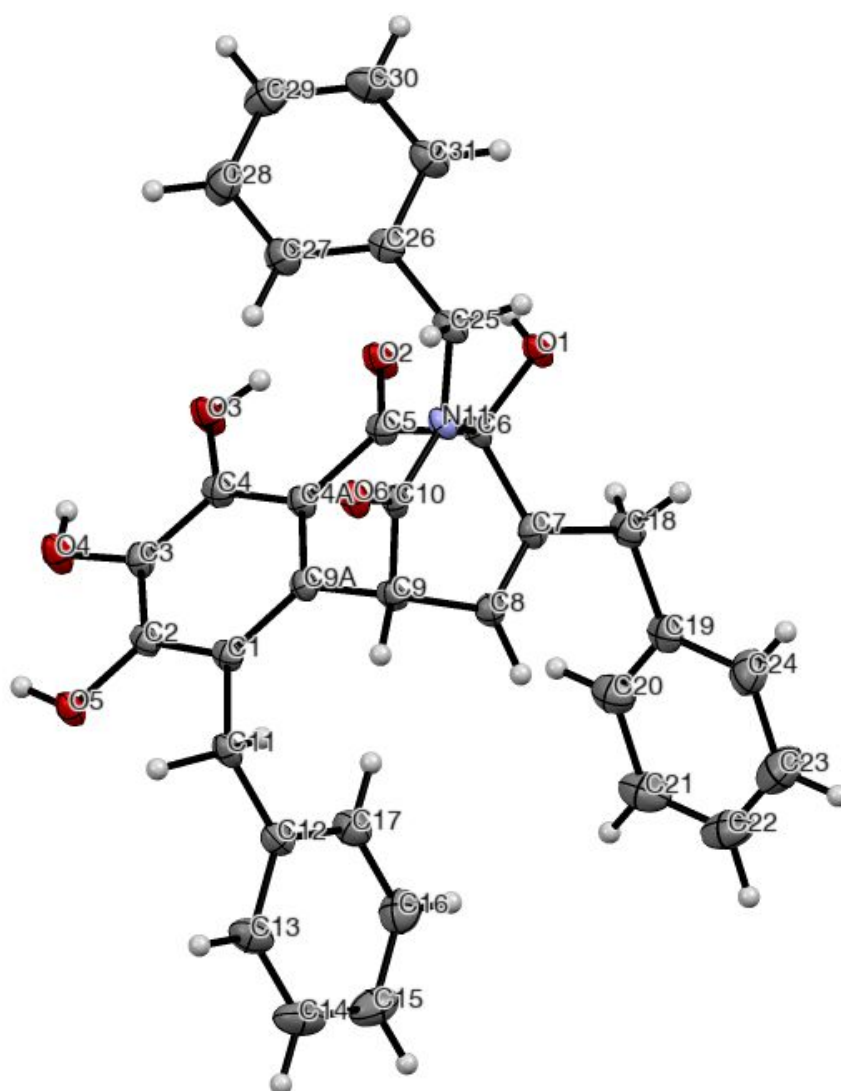

**19red**

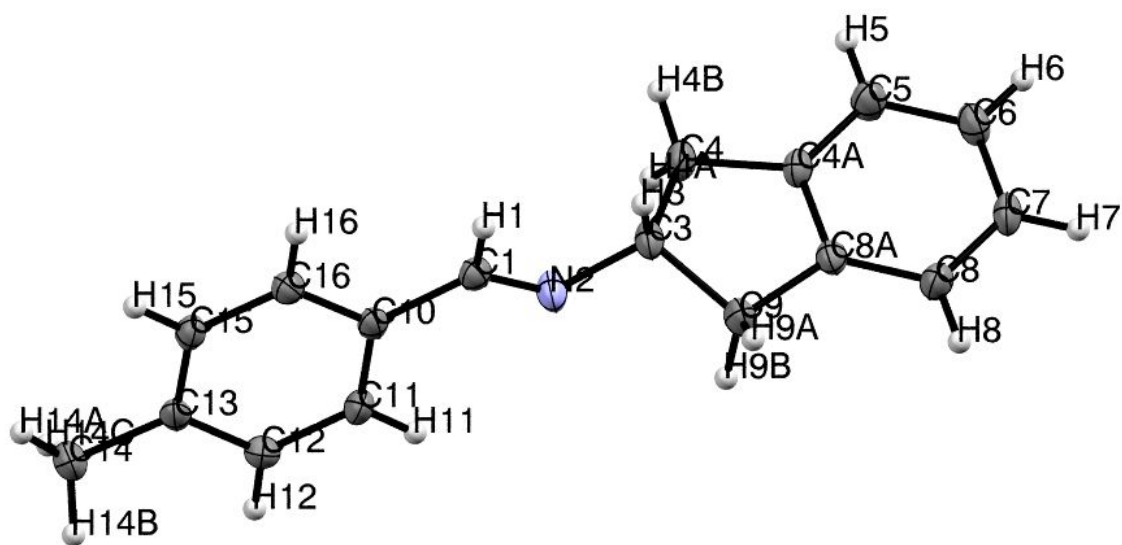

24j

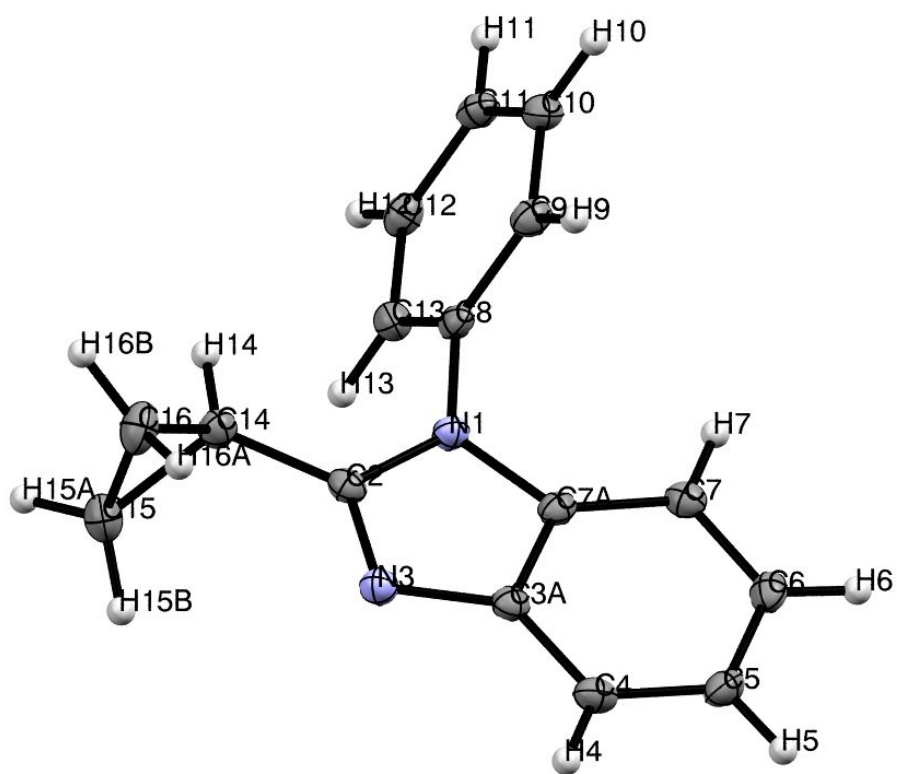

25d

**Table S1** - Crystal data and structure refinements for **19red**, **24j** and **25d**

| Compounds                                    | <b>19d</b>                                      | <b>24j</b>                        | <b>25d</b>                                     |
|----------------------------------------------|-------------------------------------------------|-----------------------------------|------------------------------------------------|
| Formula                                      | C <sub>33</sub> H <sub>27</sub> NO <sub>6</sub> | C <sub>17</sub> H <sub>17</sub> N | C <sub>16</sub> H <sub>14</sub> N <sub>2</sub> |
| CCDC                                         | 1965257                                         | 1981805                           | 1981802                                        |
| Fw                                           | 533.55                                          | 235.31                            | 234.29                                         |
| T(K)                                         | 100(2)                                          | 100(2)                            | 100(2)                                         |
| Radiation type ; wavelength (Å)              | Cu K $\alpha$ ; 1.54178                         | Cu K $\alpha$ ; 1.54178           | Cu K $\alpha$ ; 1.54178                        |
| crystal system                               | triclinic                                       | triclinic                         | triclinic                                      |
| space group                                  | P -1                                            | P -1                              | P -1                                           |
| unit cell dimension                          |                                                 |                                   |                                                |
| a (Å)                                        | 12.6327(6)                                      | 5.6742(2)                         | 10.3880(4)                                     |
| b (Å)                                        | 15.2434(7)                                      | 8.7921(4)                         | 10.8621(4)                                     |
| c (Å)                                        | 15.9800(7)                                      | 13.5713(5)                        | 11.9356(4)                                     |
| $\alpha$ (°)                                 | 102.027(2)                                      | 103.259(1)                        | 103.368(1)                                     |
| $\beta$ (°)                                  | 105.432(2)                                      | 95.099(1)                         | 111.316(1)                                     |
| $\gamma$ (°)                                 | 112.595(2)                                      | 95.624(1)                         | 90.267(1)                                      |
| Cell volume $V$ (Å <sup>3</sup> )            | 2566.4(2)                                       | 651.48(4)                         | 1214.77(8)                                     |
| Z                                            | 4                                               | 2                                 | 4                                              |
| $d$ (calc) (Mg/m <sup>3</sup> )              | 1.381                                           | 1.200                             | 1.281                                          |
| abs coeff $\mu$ (mm <sup>-1</sup> )          | 0.776                                           | 0.526                             | 0.591                                          |
| crystal size (mm <sup>3</sup> )              | 0.27 × 0.22 × 0.05                              | 0.23 × 0.19 × 0.04                | 0.21 × 0.16 × 0.10                             |
| crystal color                                | yellow                                          | colorless                         | colorless                                      |
| $F_{000}$                                    | 1120                                            | 252                               | 496                                            |
| $\theta$ range [deg]                         | 3.061 - 66.744                                  | 3.368 - 63.997                    | 4.106 – 59.042                                 |
| index ranges                                 | -15<h<15                                        | -6<h<6                            | -11<h<11                                       |
|                                              | -18<k<18                                        | -10<k<10                          | -12<k<12                                       |
|                                              | -19<l<19                                        | -15<l<15                          | -13<l<13                                       |
| no. of reflns collected                      | 77250                                           | 21496                             | 29618                                          |
| no. of unique reflns                         | 9064                                            | 2166                              | 3491                                           |
| R(int)                                       | 0.0269                                          | 0.0223                            | 0.0147                                         |
| GOF on $F^2$                                 | 1.011                                           | 1.072                             | 1.099                                          |
| Reflns obs. [ $I > 2\sigma(I)$ ]             | 7943                                            | 1995                              | 3328                                           |
| Parameters                                   | 743                                             | 166                               | 325                                            |
| R1/wR2 <sup>a,b</sup> , [ $I > 2\sigma(I)$ ] | 0.0375/0.0998                                   | 0.0439/0.1096                     | 0.0314/0.0776                                  |
| R1/wR2 <sup>a,b</sup> , all data             | 0.0427/0.1045                                   | 0.0464/0.1122                     | 0.0327/0.0784                                  |

largest diff peak and hole [ $e \cdot \text{\AA}^{-3}$ ]    0.237 and -0.245    0.357 and -0.351    0.121 and -0.243

---

<sup>a</sup>R1 =  $\Sigma ||F_o| - |F_c|| / \Sigma |F_o|$ . <sup>b</sup> wR2 =  $\{\Sigma [w(F_o^2 - F_c^2)^2] / \Sigma [w(F_o^2)^2]\}$ ; where  $w = q/\sigma^2(F_o^2) + (qp)^2 + bp$ . GOF =  $S = \{\Sigma [w(F_o^2 - F_c^2)^2] / (n - p)\}^{1/2}$ .

### III. References

- 1 S. Kegnaes, J. Mielby, U.V. Mentzel, C.H. Christensen and A. Riisager, *Green. Chem.* 2010, **12**, 1437.
- 2 M. LARGERON and M.-B. Fleury, *Chem. Eur. J.* 2015, **21**, 3815.
- 3 M. LARGERON and M.-B. Fleury, *Chem. Eur. J.* 2017, **23**, 6763.
- 4 L. Huang, Y. Zhang, R. J. Staples, R.H. Huang and W.D. Wulff, *Chem. Eur. J.*, 2012, **18**, 5302.
- 5 N. Levin, B. E. Graham and H. G. Kollof, *J. Org. Chem.* 1944, **9**, 380.
- 6 A. Mukherjee, A. Nerush, G. Leitius, L. J. W. Shimon, Y. Ben David, N. A. Espinosa Jalapa and D. Milstein, *J. Am. Chem. Soc.* 2016, **138**, 4298.
- 7 H. Neuvonen, K. Neuvonen and F. Fülöp, *J. Org. Chem.* 2006, **71**, 4141.
- 8 K. M. H Nguyen and M. LARGERON, *Chem. Eur. J.* 2015, **21**, 12606.
- 9 K. M. H Nguyen and M. LARGERON, *Eur. J. Org. Chem.* 2016, **2016**, 1025.
- 10 *APEX3. Data Collection Software*, Bruker AXS Inc.: Madison, Wisconsin, USA, 2007.
- 11 *Bruker SAINT*, Bruker AXS Inc: Madison, Wisconsin, USA, 2007.
- 12 *SADABS.2008/1*, Bruker AXS Inc.: Madison, Wisconsin, USA, 2007.
- 13 Sheldrick, G. M. *SHELXS-97, Program for crystal structure solution*, University of Gottingen, Germany, 1997.
- 14 Sheldrick, G. M. *SHELXL-2008, Acta Crystallogr., Sect. A: Found. Crystallogr.* 2008, **64**, 112-122.

**IV. High field <sup>1</sup>H NMR spectra and 1D proton-decoupled <sup>13</sup>C NMR spectra for all isolated products 18red, 19red, 24a-o and 25a-o. 2D NMR spectra (HMBC and HSQC) for compounds 18red and 19red. (see next page)**

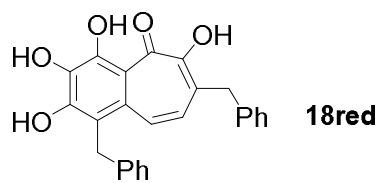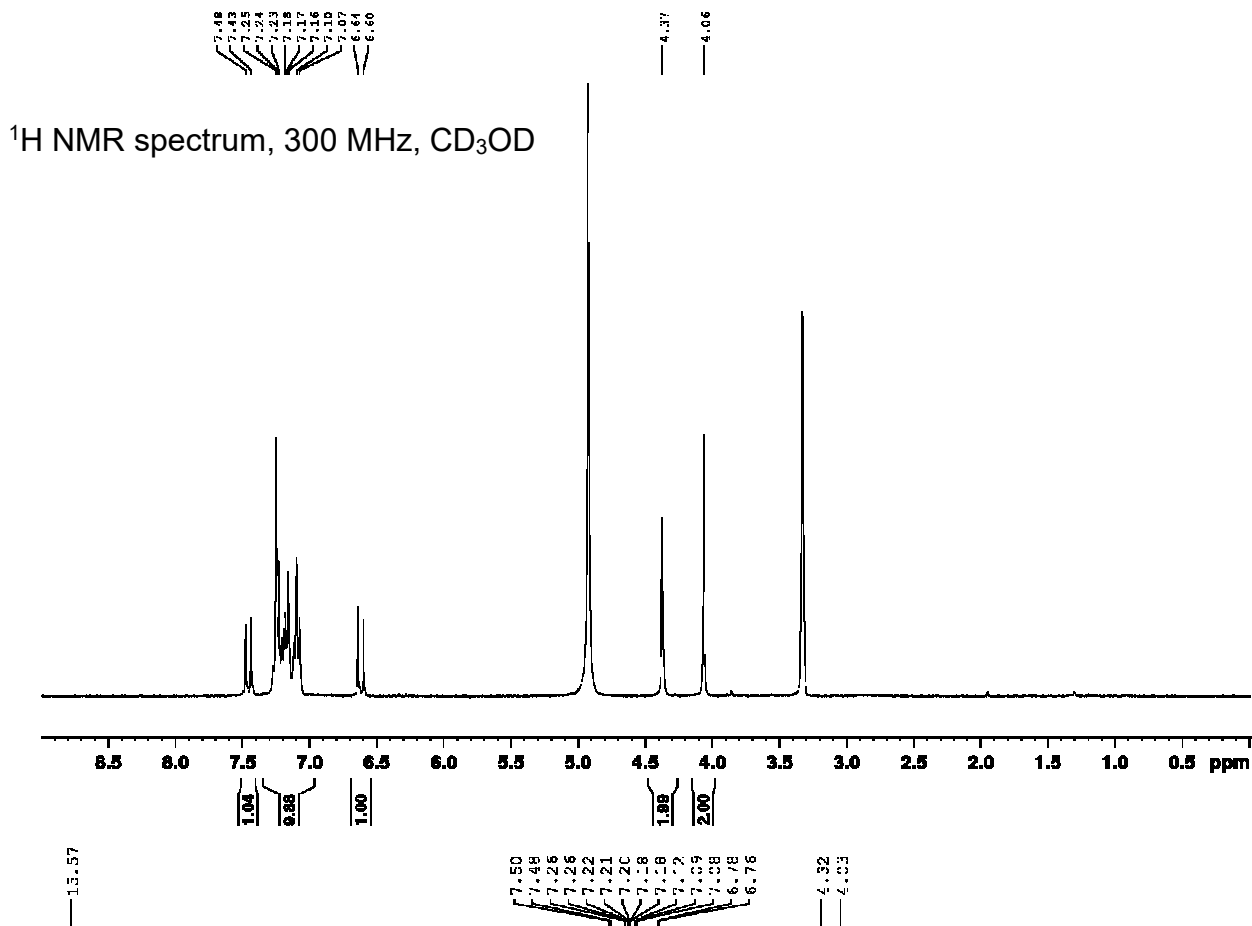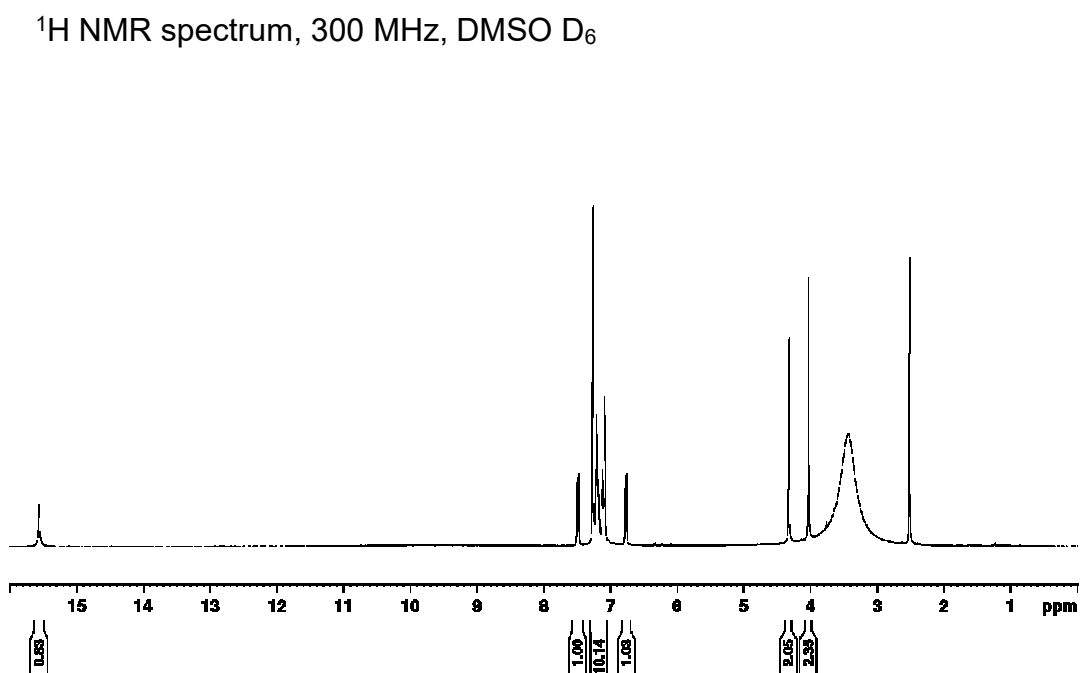

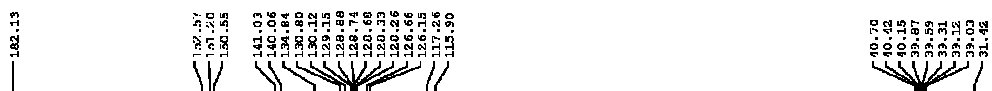

1D proton-decoupled  $^{13}\text{C}$  NMR spectrum, 75 MHz, DMSO  $\text{D}_6$

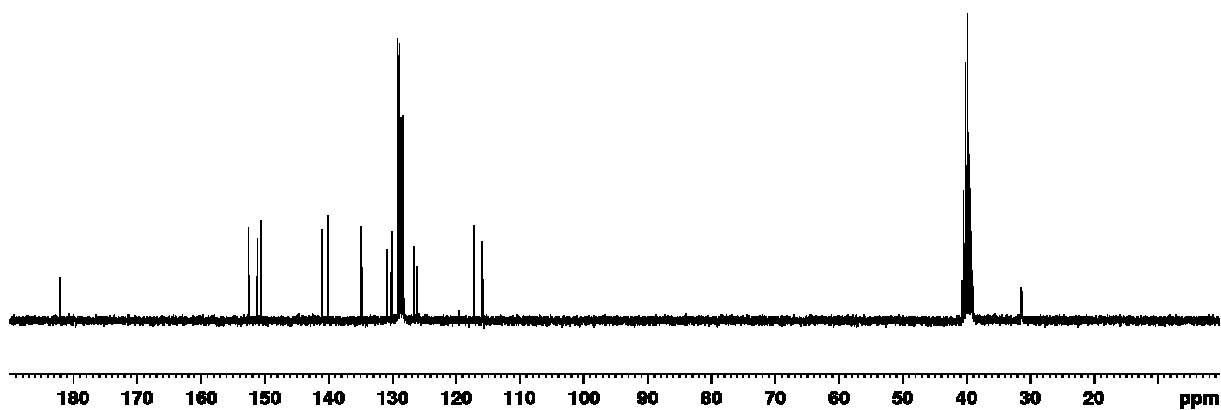

DEPT experiment, DMSO  $\text{D}_6$

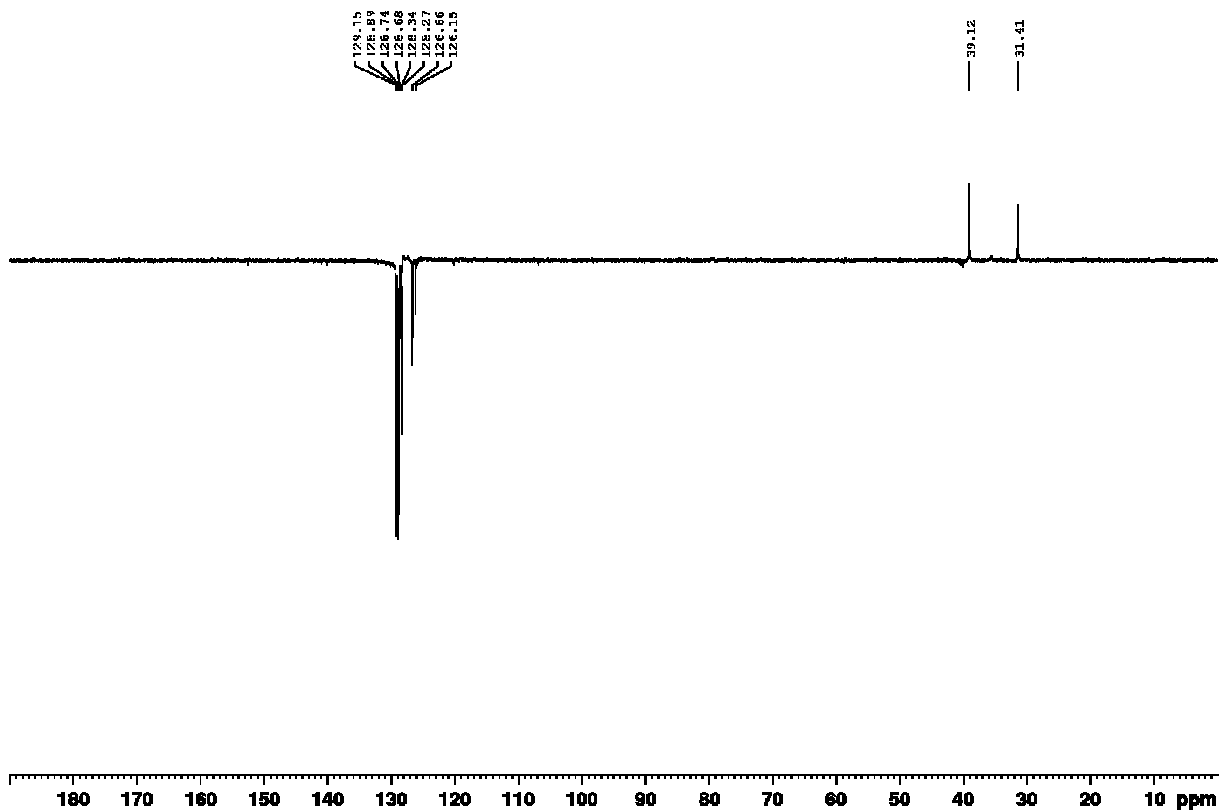



## HMBC Experiment (DMSO D<sub>6</sub>) for **18red**

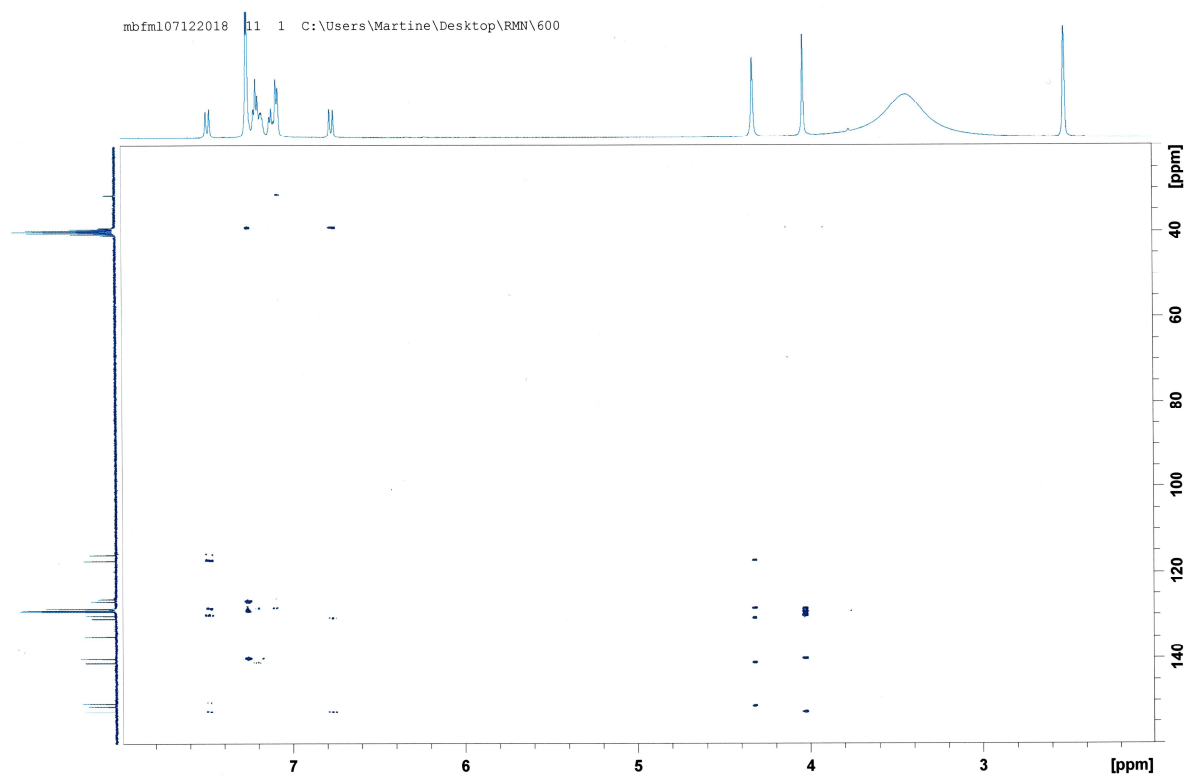

## HSQC Experiment (DMSO D<sub>6</sub>) for **18red**

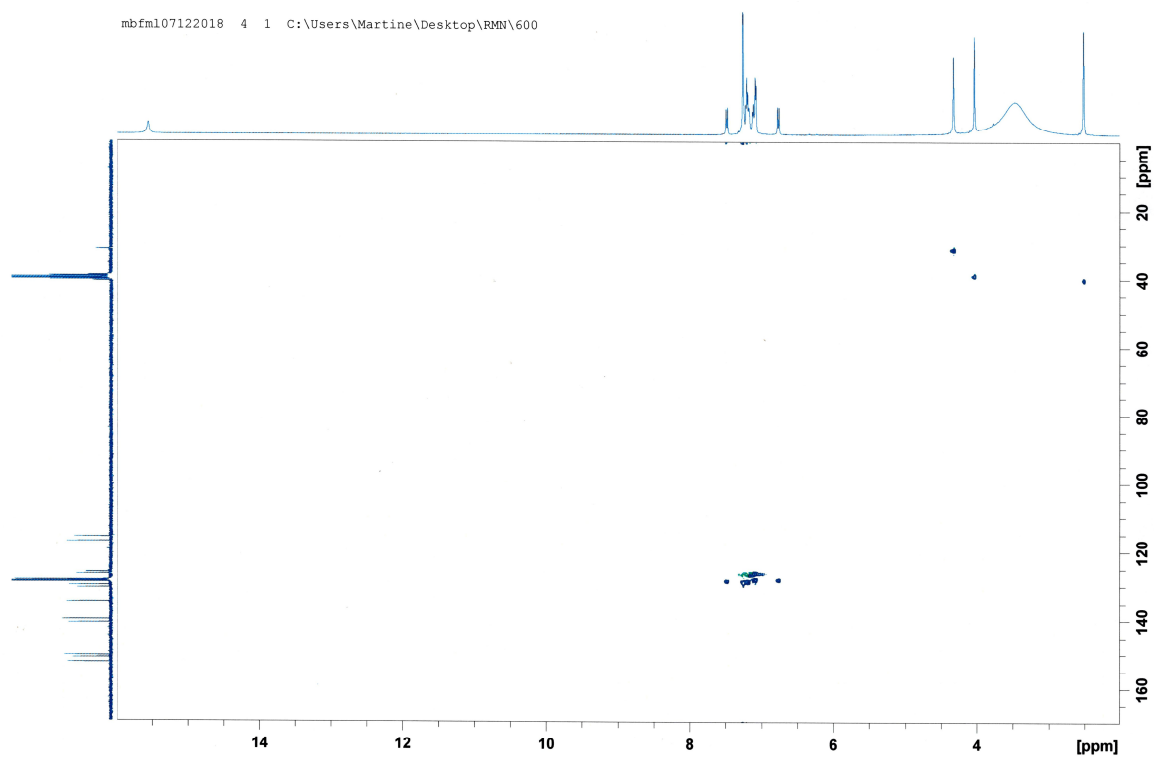

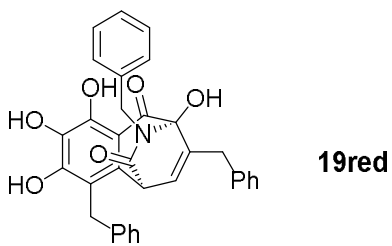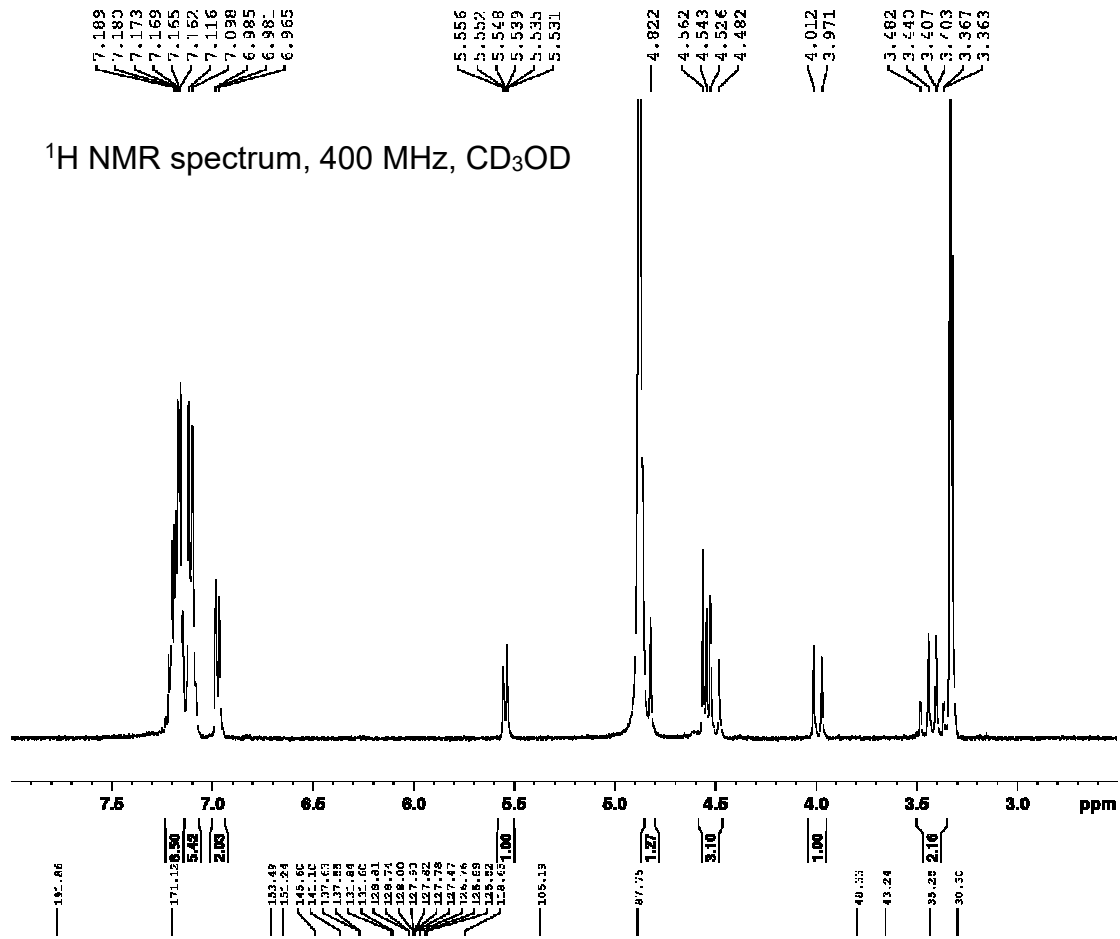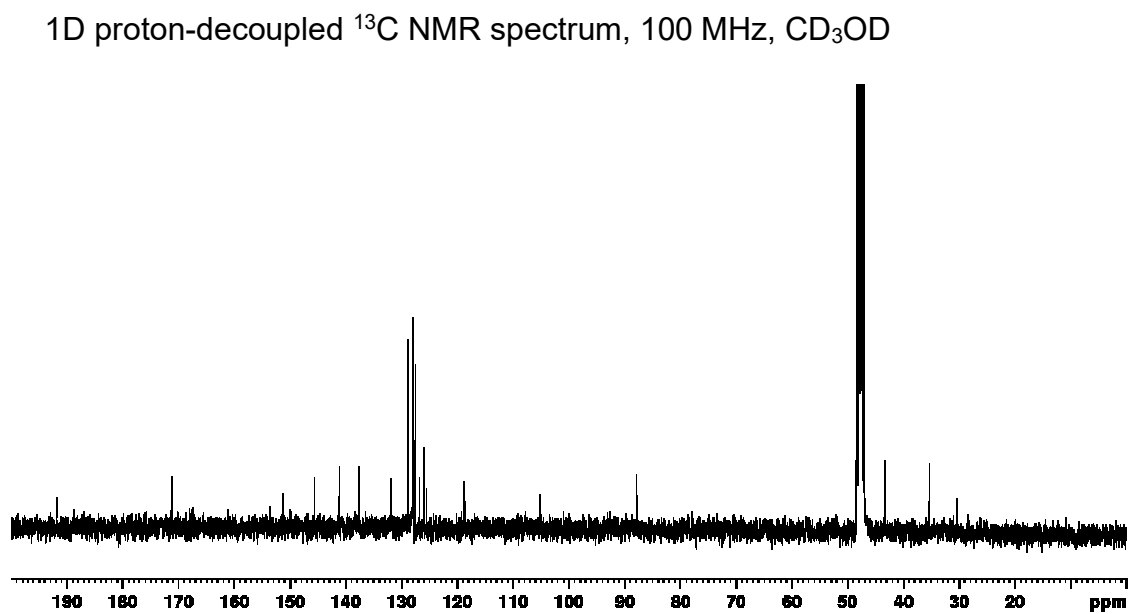

## HMBC Experiment (CD<sub>3</sub>OD) for **19red**

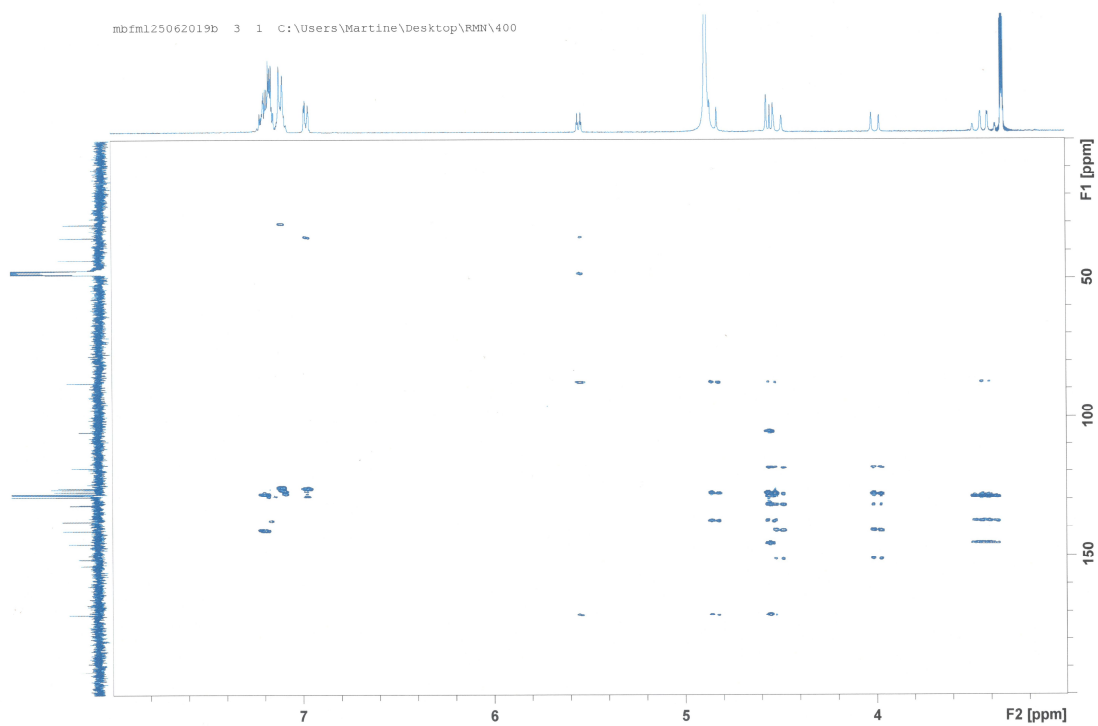

## HSQC Experiment (CD<sub>3</sub>OD) for **19red**

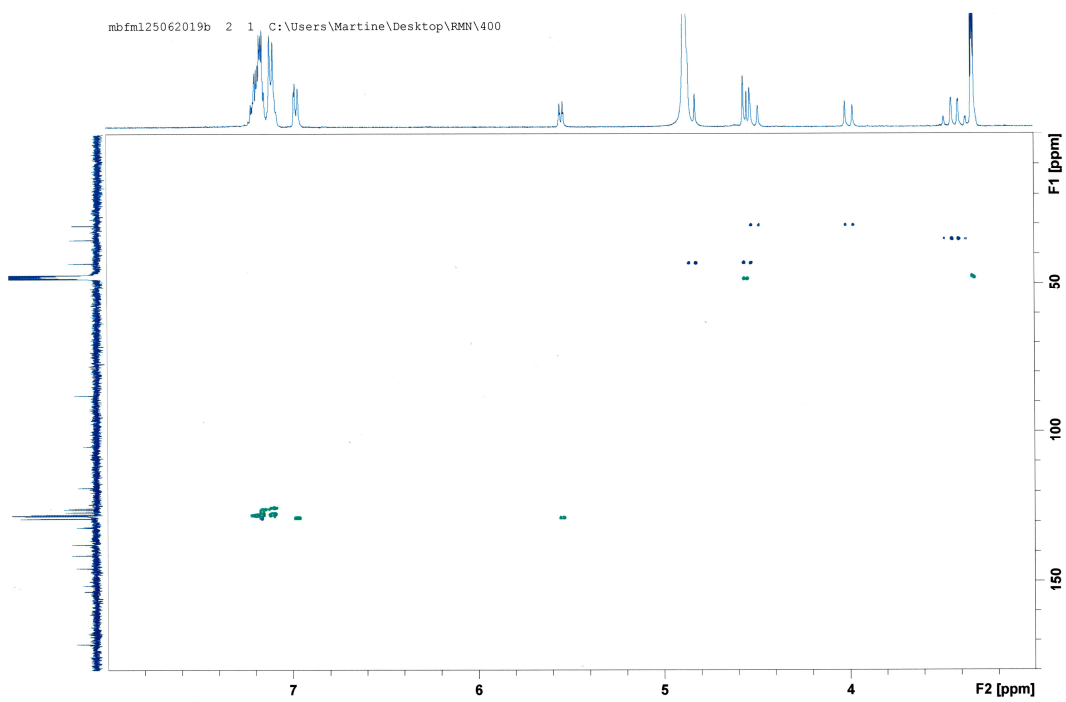

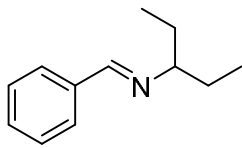

**24a**

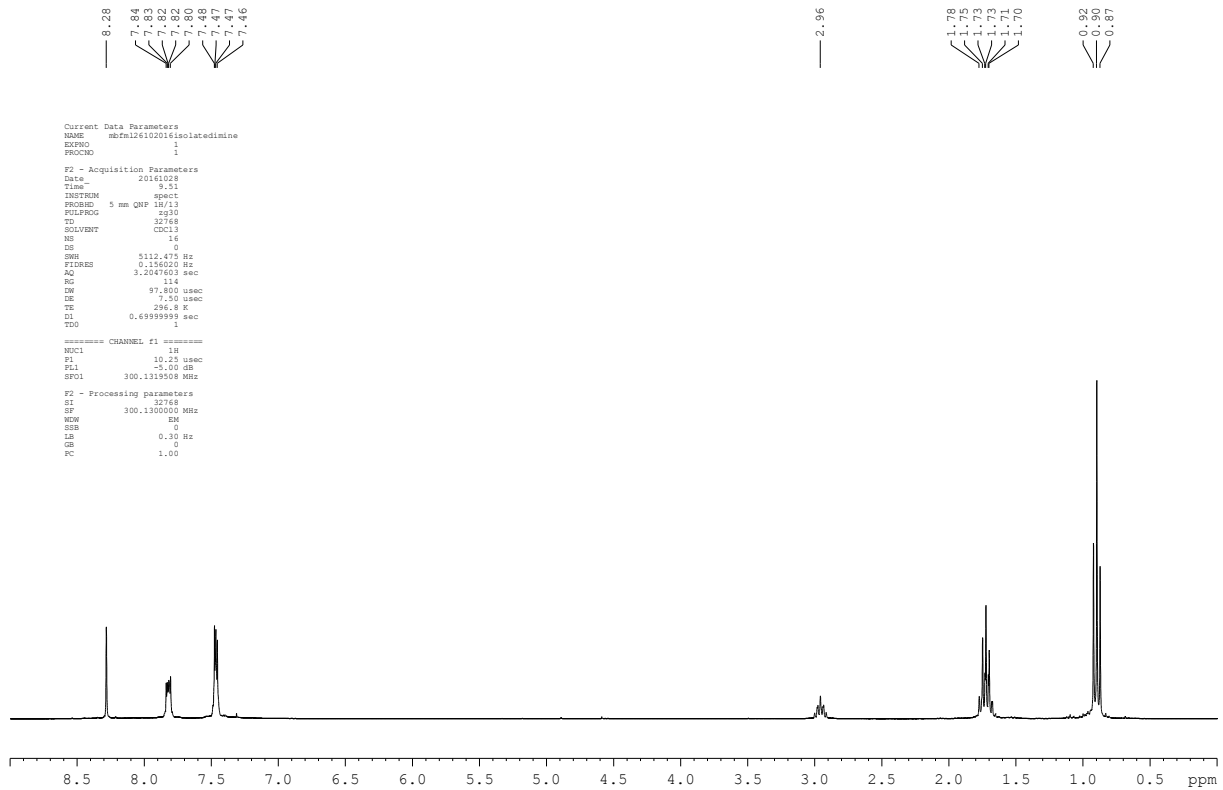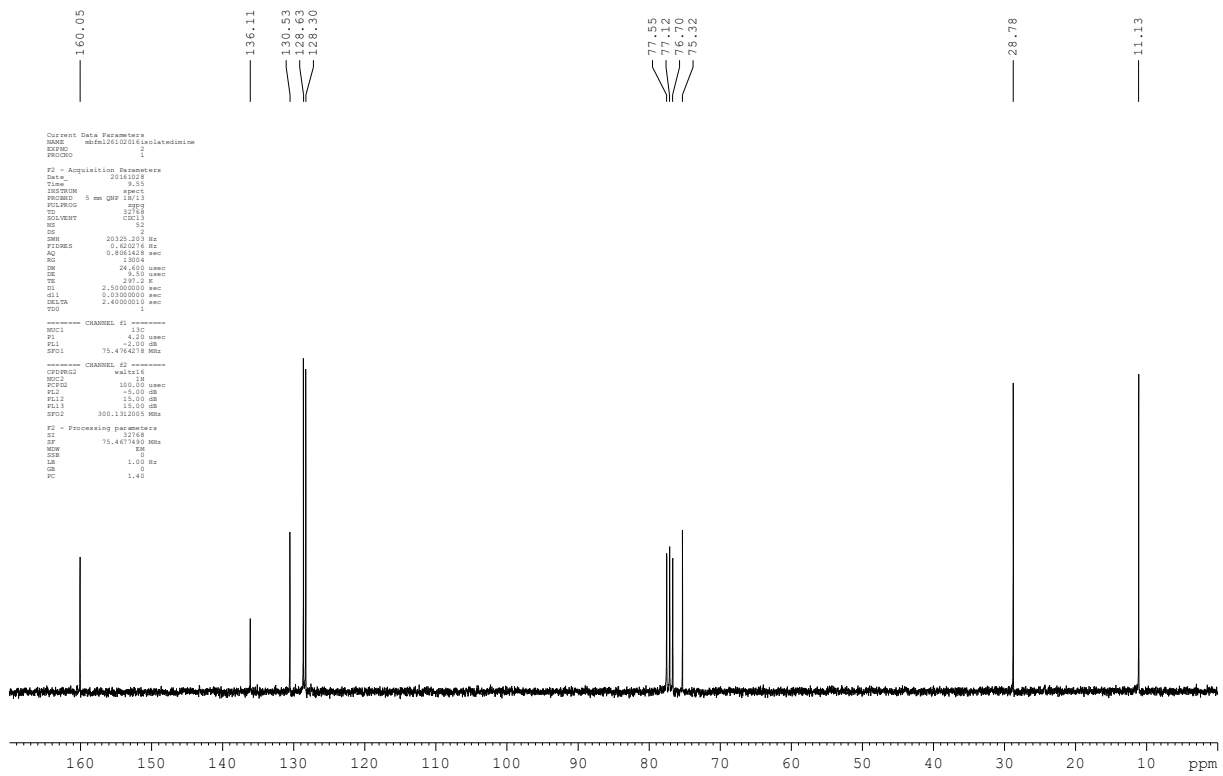

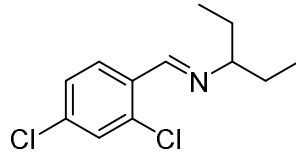

**24b**

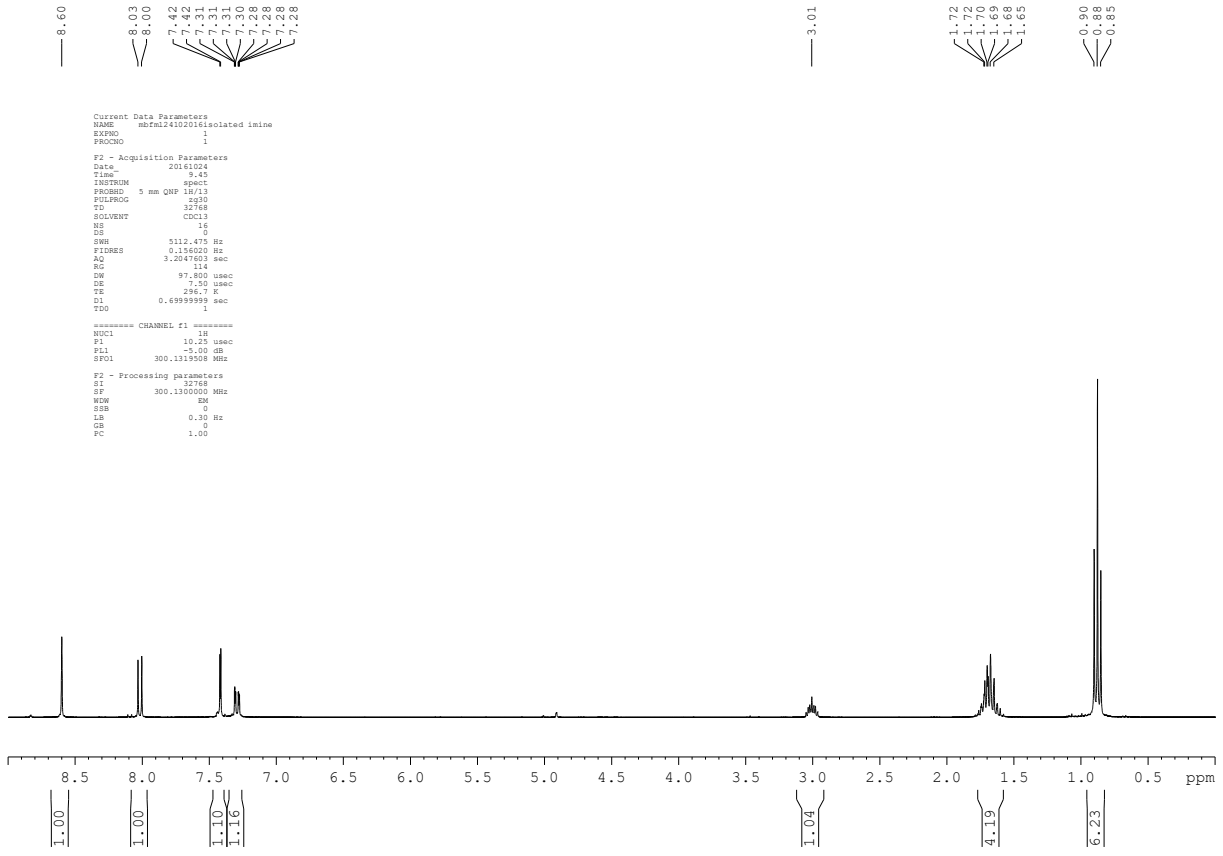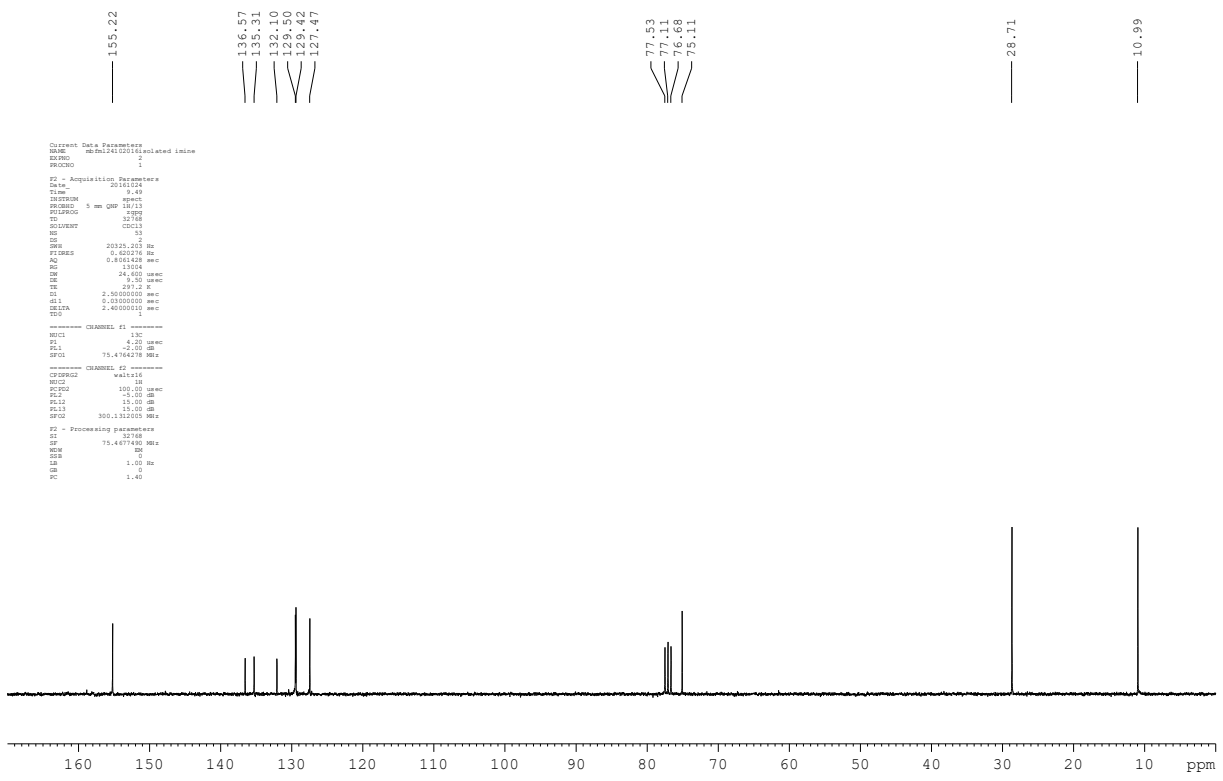

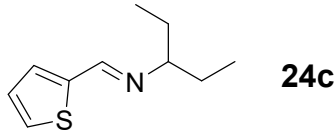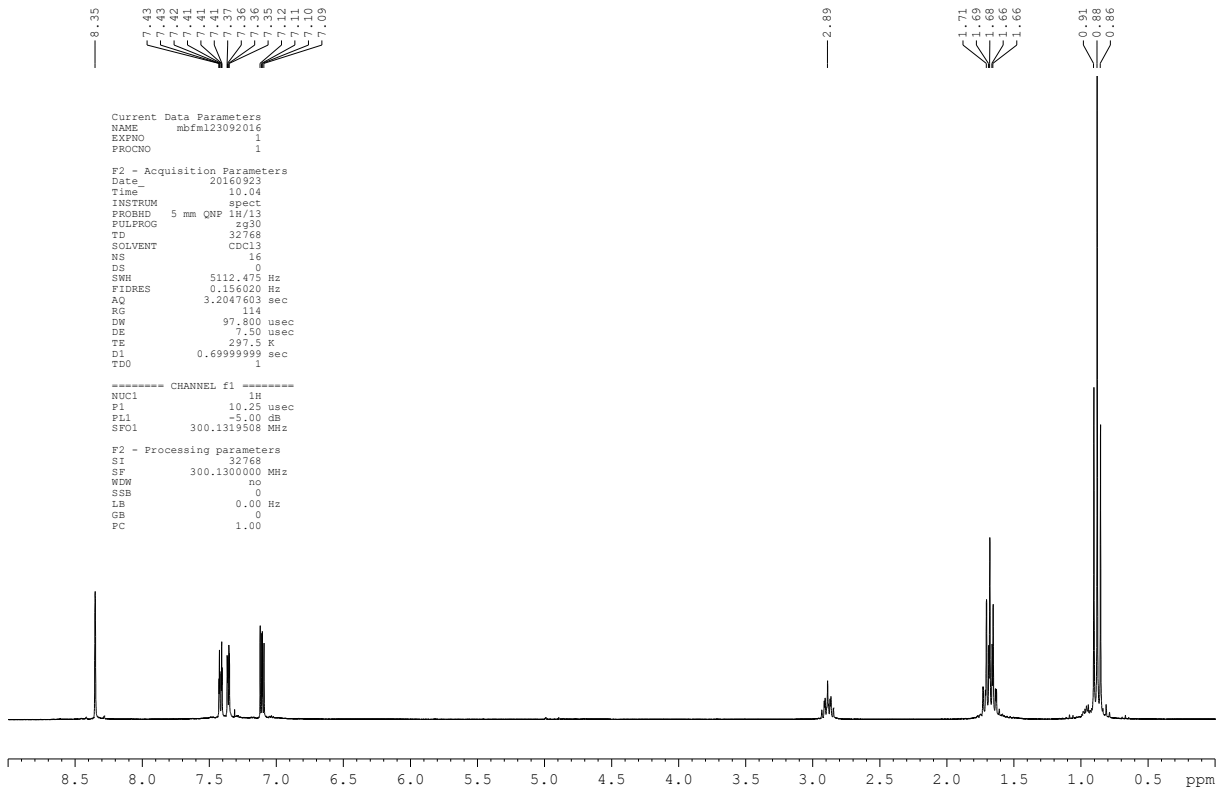

8.35  
7.43  
7.42  
7.41  
7.41  
7.37  
7.36  
7.35  
7.12  
7.11  
7.10  
7.09

```

Current Data Parameters
NAME      mbfm123092016
EXPNO    1
PROCNO   1

F2 - Acquisition Parameters
Date_    20160923
Time     10.04
INSTRUM  spect
PROBHD   5 mm QNP 1H/13
PULPROG  zg30
TD        32768
SOLVENT  CDCl3
NS        16
DS        0
SWH       5112.475 Hz
FIDRES   0.156020 Hz
AQ        3.2047603 sec
RG        114
DW        97.800 usec
DE        7.50 usec
TE        297.5 K
D1        0.69999999 sec
TD0       1
  
```

```

===== CHANNEL f1 =====
NUC1      1H
P1        10.25 usec
PL1       -1.00 dB
SFO1      300.1319508 MHz
  
```

```

F2 - Processing parameters
SI        32768
SF        300.1300000 MHz
WDW       no
SSB       0
LB        0.00 Hz
GB        0
PC        1.00
  
```

1.00 2.02 1.01 1.02 4.10 6.18

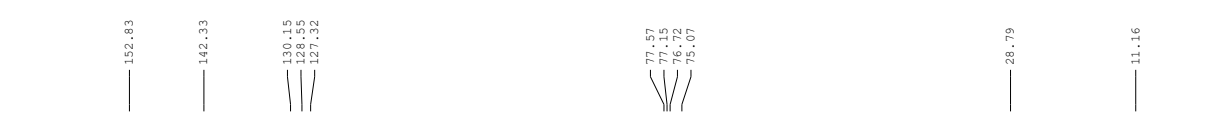

```

Current Data Parameters
NAME      mbfm123092016
EXPNO    2
PROCNO   1

F2 - Acquisition Parameters
Date_    20160923
Time     10.08
INSTRUM  spect
PROBHD   5 mm QNP 1H/13
PULPROG  zgpg30
TD        32768
SOLVENT  CDCl3
NS        33
DS        2
SWH       20325.203 Hz
FIDRES   0.620276 Hz
AQ        0.8061468 sec
RG        13004
DW        24.600 usec
DE        3.50 usec
TE        297.8 K
D1        2.50000000 sec
d11       0.03000000 sec
DELTA    2.40000010 sec
TD0       1
  
```

```

===== CHANNEL f1 =====
NUC1      13C
P1        4.20 usec
PL1       -2.00 dB
SFO1      75.4764278 MHz
  
```

```

===== CHANNEL f2 =====
CPDPRG2  waltz16
NUC2      1H
PCPD2    100.00 usec
PL2       -1.00 dB
PL12     15.00 dB
PL13     15.00 dB
SFO2      300.1312005 MHz
  
```

```

F2 - Processing parameters
SI        32768
SF        75.4677480 MHz
WDW       EM
SSB       0
LB        1.00 Hz
GB        0
PC        1.40
  
```

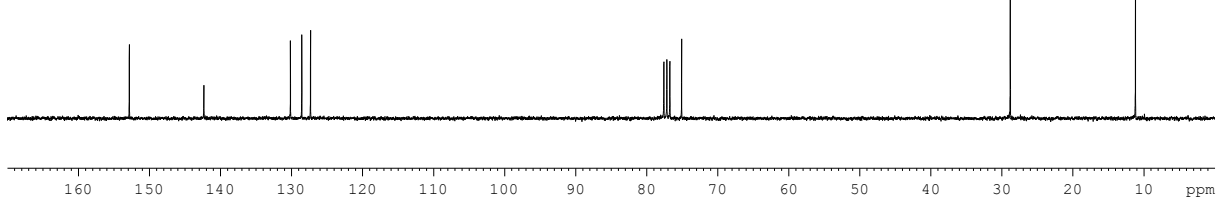

160 150 140 130 120 110 100 90 80 70 60 50 40 30 20 10 ppm

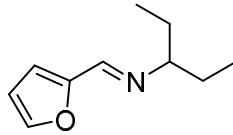

24d

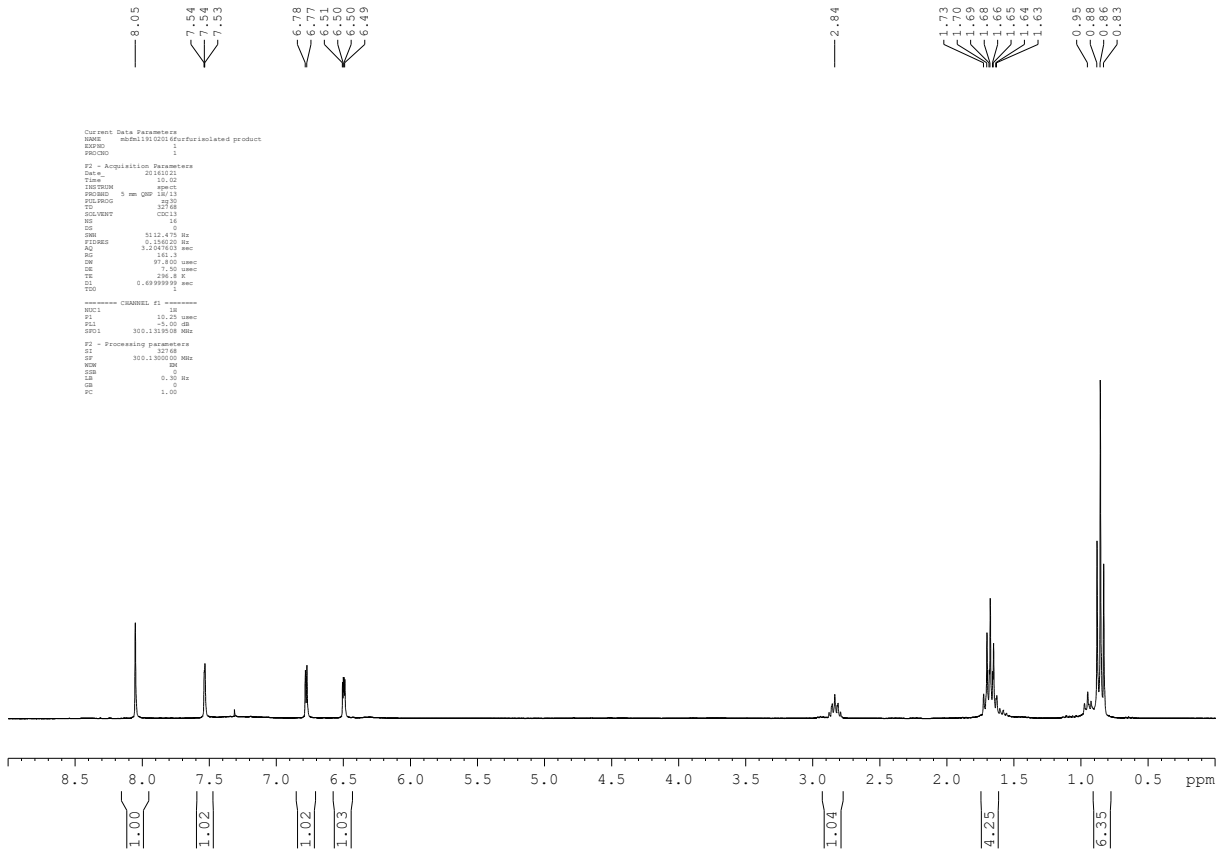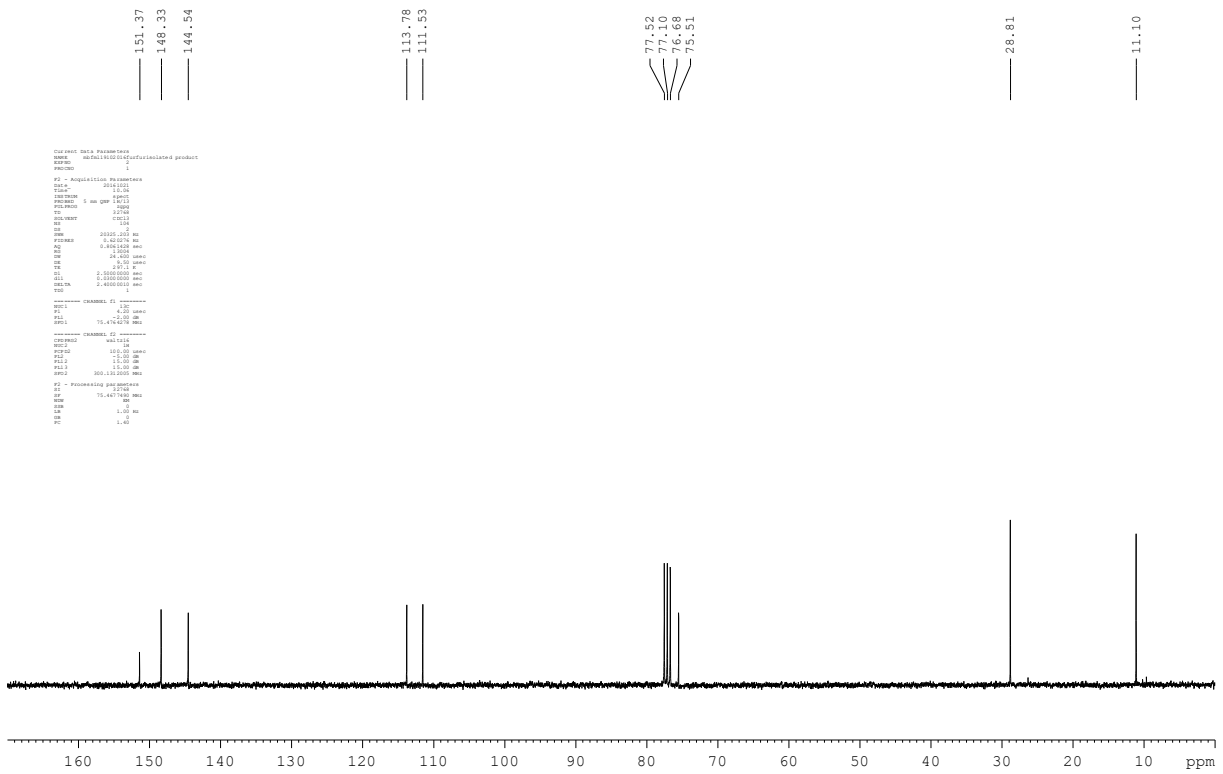

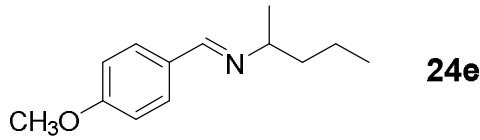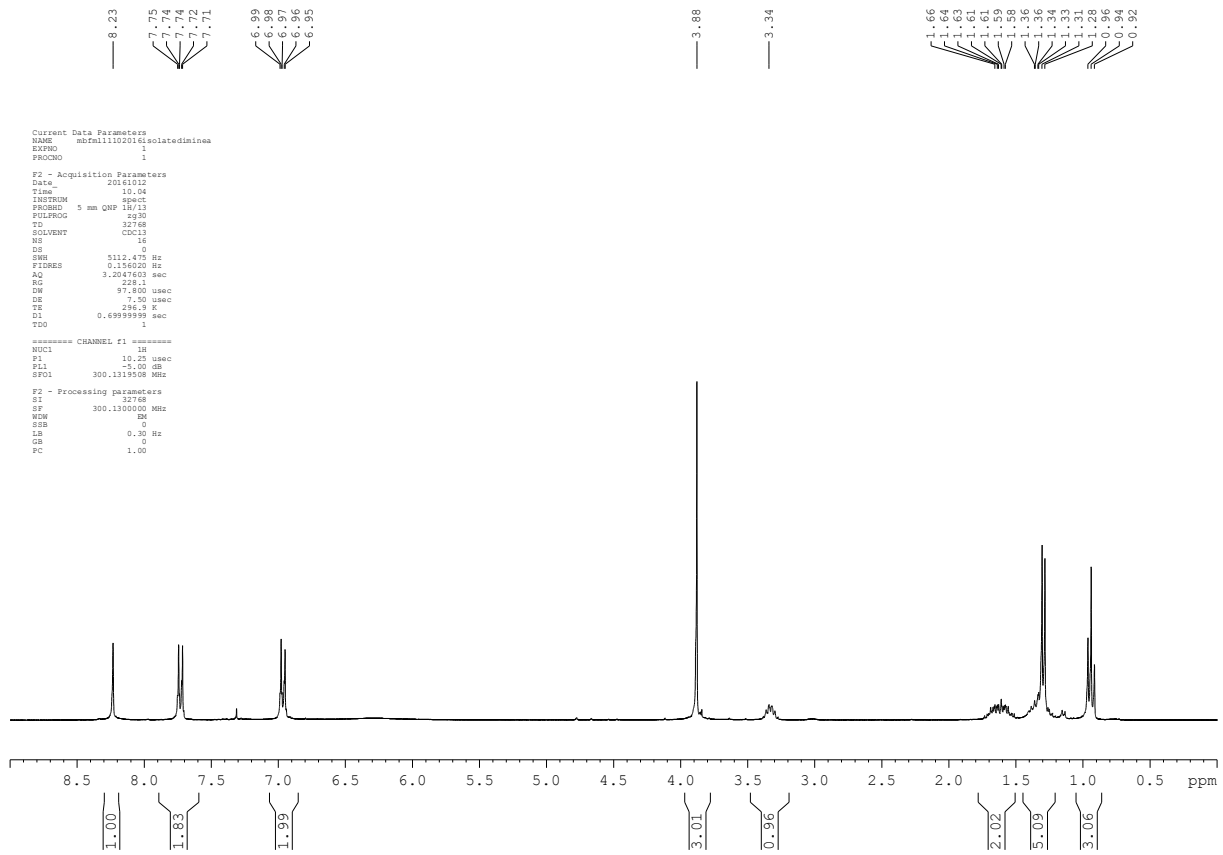

```

Current Data Parameters
NAME: hb11110011isolatedlinea
EXPNO: 1
PROCNO: 1

F2 - Acquisition Parameters
Date_: 20161012
Time: 10.04
INSTRUM: spect
PROBHD: 5 mm QNP 1H/13
PULPROG: zg30
TD: 32768
SOLVENT: CDCl3
NS: 16
DS: 0
SWH: 3112.475 Hz
FIDRES: 0.156020 Hz
AQ: 3.2047603 sec
RG: 228.1
DB: 97.800 usec
DE: 7.50 usec
TE: 300.2 K
D1: 0.69999999 sec
TD0: 1

===== CHANNEL f1 =====
NUC1: 1H
P1: 10.25 usec
PL1: -1.00 dB
SFO1: 300.1319508 MHz

F2 - Processing parameters
SI: 32768
SF: 300.1300000 MHz
WDW: EM
SSB: 0
LB: 0.30 Hz
GB: 0
PC: 1.00
  
```

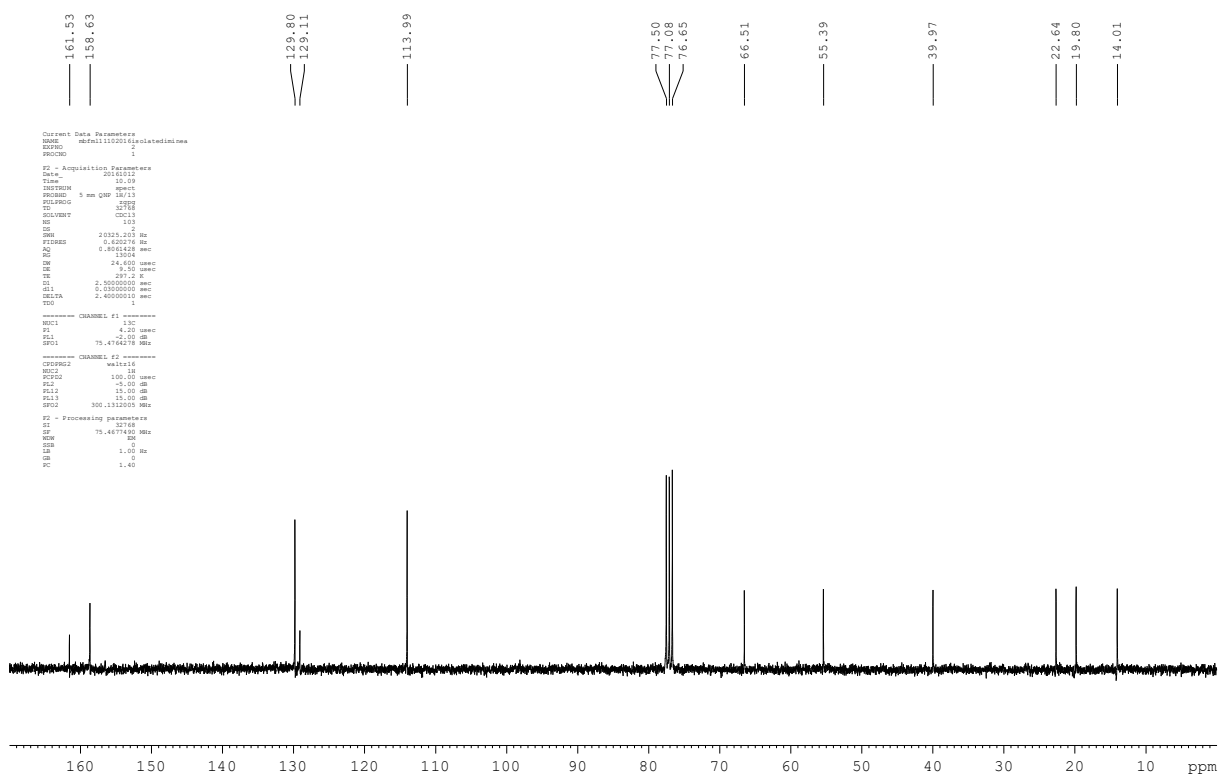

```

Current Data Parameters
NAME: hb11110011isolatedlinea
EXPNO: 1
PROCNO: 1

F2 - Acquisition Parameters
Date_: 20161012
Time: 10.09
INSTRUM: spect
PROBHD: 5 mm QNP 1H/13
PULPROG: zgpg30
TD: 65536
SOLVENT: CDCl3
NS: 102
DS: 2
SWH: 2021.203 Hz
FIDRES: 0.420276 Hz
AQ: 0.801428 sec
RG: 120.4
DB: 24.600 usec
DE: 1.50 usec
TE: 300.2 K
D1: 2.5000000 sec
DELTA: 2.8000000 sec
TD0: 1

===== CHANNEL f1 =====
NUC1: 13C
P1: 4.20 usec
PL1: -2.00 dB
SFO1: 75.4764278 MHz

===== CHANNEL f2 =====
CPDPRG2: waltz16
PCPD2: 100.00 usec
PL2: -45.00 dB
PL12: 11.00 dB
PL13: 11.00 dB
SFO2: 300.1320000 MHz

F2 - Processing parameters
SI: 32768
SF: 75.4677400 MHz
WDW: EM
SSB: 0
LB: 1.00 Hz
GB: 0
PC: 1.40
  
```



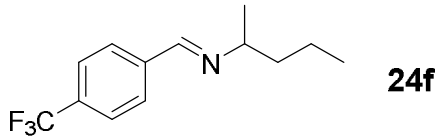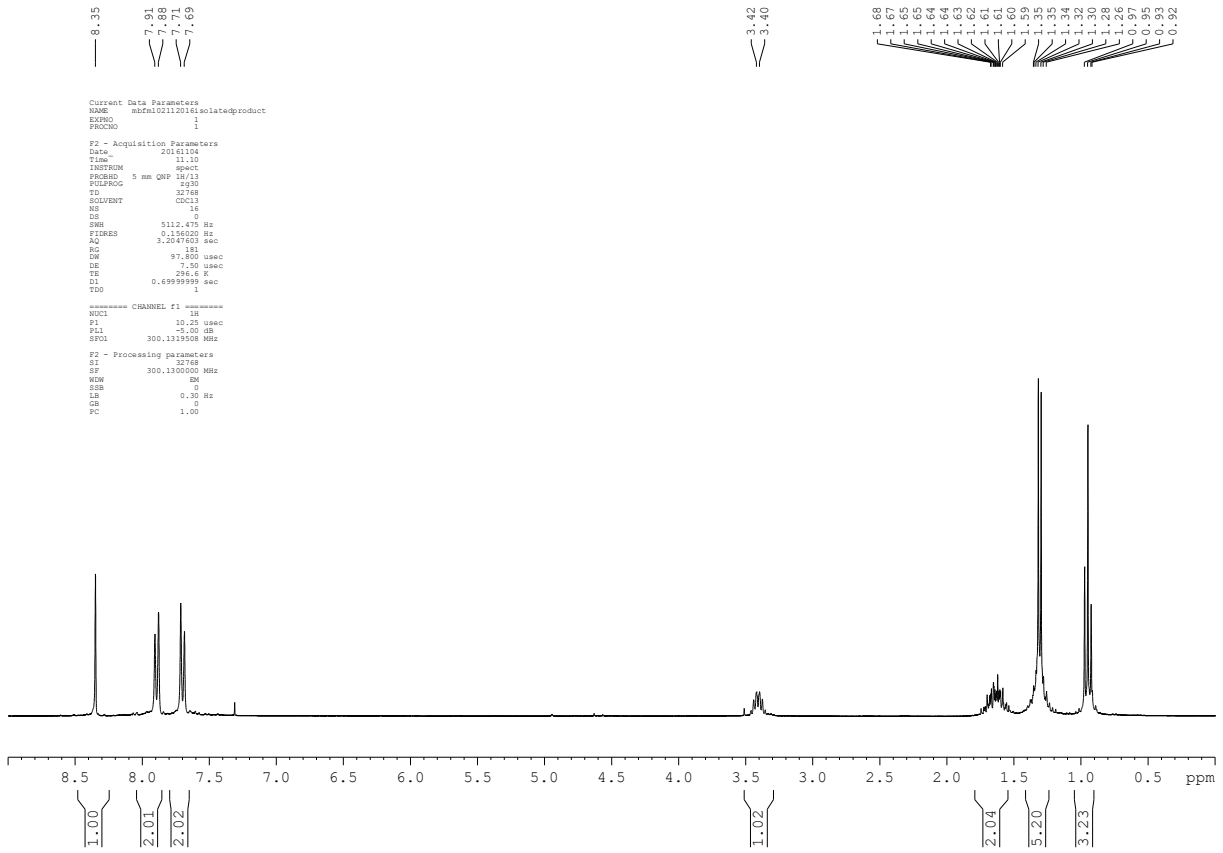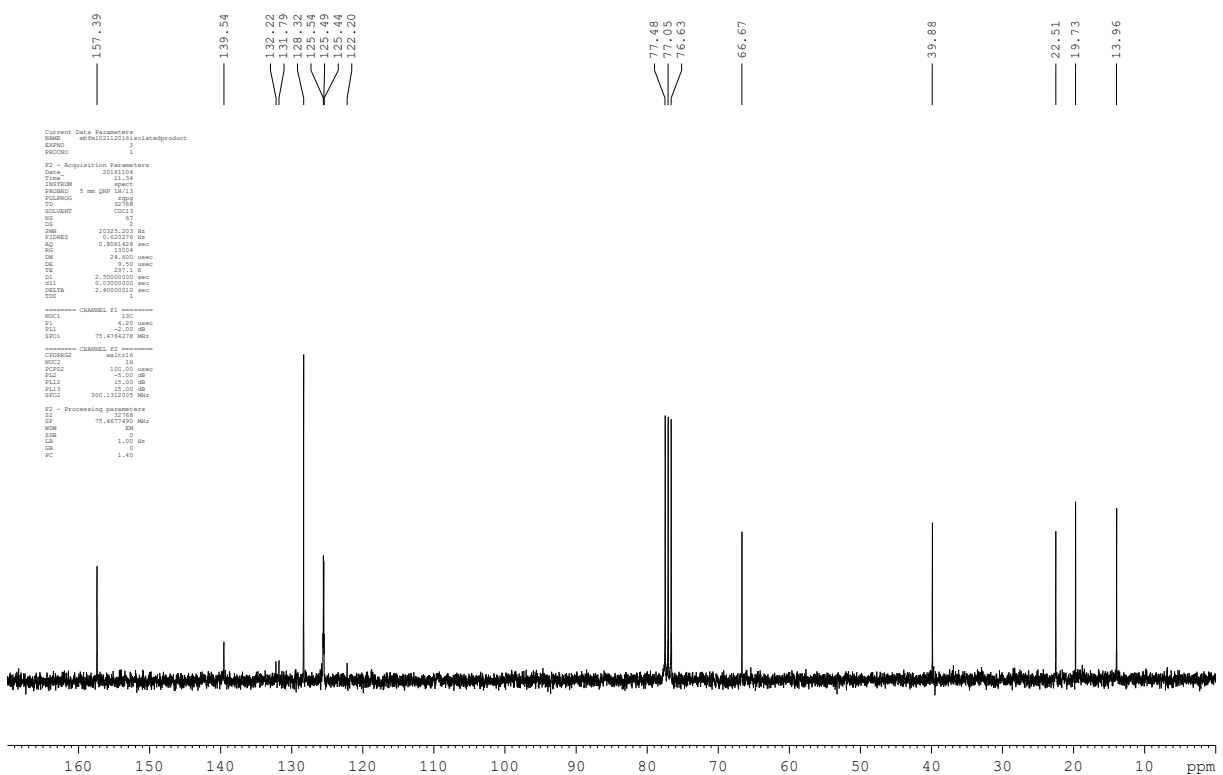

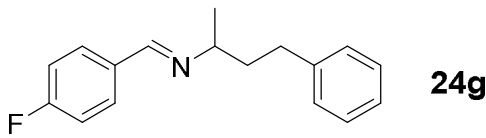

8.30  
7.87  
7.85  
7.84  
7.82  
7.39  
7.39  
7.37  
7.36  
7.34  
7.29  
7.28  
7.27  
7.25  
7.21  
7.21  
7.18  
7.15

3.45  
3.42  
3.41  
3.43  
2.74  
2.72  
2.71  
2.67  
2.65  
2.64  
2.62  
2.13  
2.10  
2.08  
2.07  
2.05  
2.04  
2.03  
2.02  
2.02  
1.40  
1.38

Current Data Parameters  
NAME: mbs07112007isolated imine  
EXPNO: 2  
PROCNO: 1

F2 - Acquisition Parameters  
Date\_: 20161120  
Time: 9.26  
INSTRUM: spect  
PROBHD: 5 mm QNP 1H/13  
PULPROG: zgpg30  
TD: 65536  
SOLVENT: CDCl3  
NS: 36  
DS: 4  
SWH: 512.470 Hz  
FIDRES: 0.156200 Hz  
AQ: 3.204763 sec  
RG: 718  
RG2: 91.850 usec  
DE: 3.50 usec  
TE: 301.2 K  
SI: 0  
SFO: 0.69999999 sec  
TDO: 1

===== CHANNEL f1 =====  
NUC1: 1H  
P1: 12.55 usec  
PL1: -5.00 dB  
SFO1: 300.131508 MHz

F2 - Processing parameters  
SI: 32768  
SF: 300.130000 MHz  
WDW: EM  
SSB: 0  
LB: 0.30 Hz  
GB: 0  
PC: 1.00

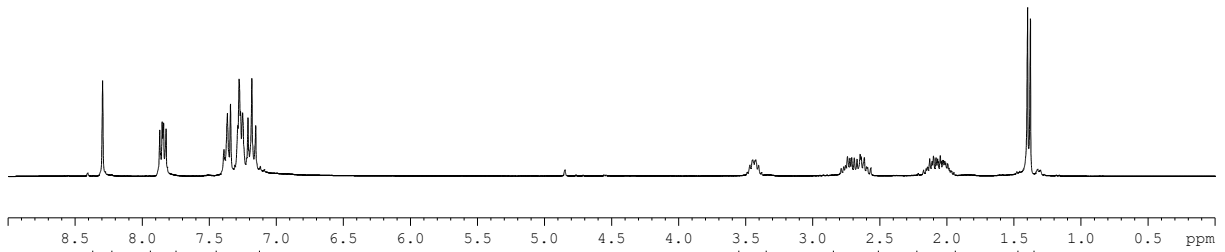

165.99  
162.67  
158.46  
142.17  
132.53  
132.49  
130.72  
130.71  
128.53  
128.43  
125.83  
115.91  
115.62

77.63  
77.20  
76.78  
66.00  
39.17  
32.95  
22.67

Current Data Parameters  
NAME: mbs07112007isolated imine  
EXPNO: 2  
PROCNO: 1

F2 - Acquisition Parameters  
Date\_: 20161120  
Time: 9.26  
INSTRUM: spect  
PROBHD: 5 mm QNP 1H/13  
PULPROG: zgpg30  
TD: 65536  
SOLVENT: CDCl3  
NS: 36  
DS: 4  
SWH: 512.470 Hz  
FIDRES: 0.156200 Hz  
AQ: 3.204763 sec  
RG: 718  
RG2: 91.850 usec  
DE: 3.50 usec  
TE: 301.2 K  
SI: 0  
SFO: 0.69999999 sec  
TDO: 1

===== CHANNEL f1 =====  
NUC1: 13C  
P1: 4.20 usec  
PL1: -2.00 dB  
SFO1: 75.478478 MHz

===== CHANNEL f2 =====  
NAME: wa11216  
NUC2: 13C  
P2: 100.00 usec  
PL2: -1.00 dB  
PL12: 19.00 dB  
SFO2: 101.626125 MHz  
SFO1: 300.1312003 MHz

F2 - Processing parameters  
SI: 32768  
SF: 75.477750 MHz  
WDW: EM  
SSB: 0  
LB: 1.00 Hz  
GB: 1.45

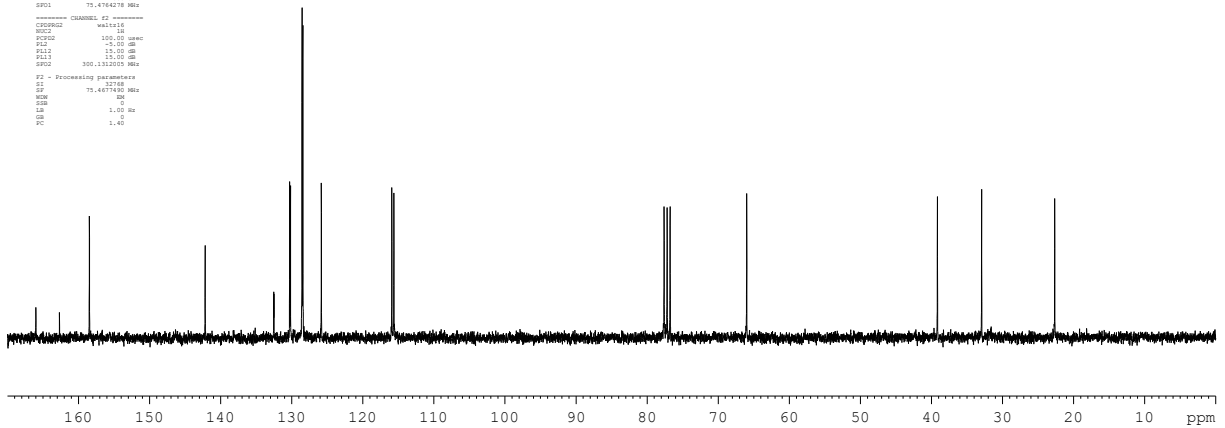

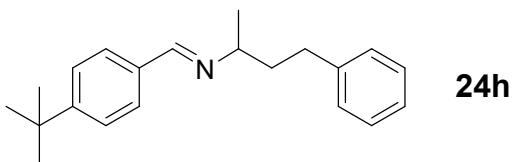

(contained trace of aldehyde formed during column chromatography)

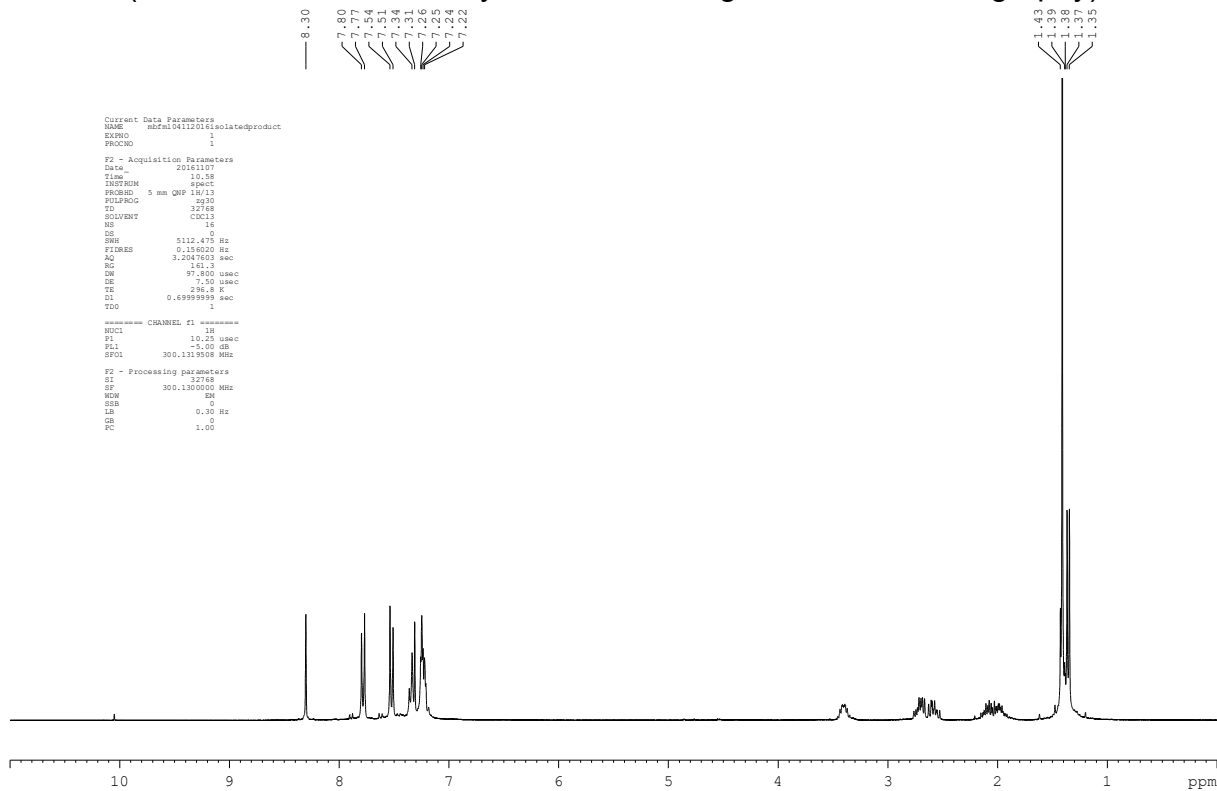

```

Current Data Parameters
NAME hbh81911101isolatedproduct
EXPNO 1
PROCNO 1
F2 - Acquisition Parameters
Date_ 20161107
Time 10:38
INSTRUM spect
PROBHD 5 mm QNP 1H/1
PULPROG zg30
TD 32768
SOLVENT CDCl3
NS 16
DS 4
SWH 5112.475 Hz
FIDRES 0.156020 Hz
AQ 3.2047653 sec
RG 661.3
SQ 97.480 usec
DE 7.50 usec
TE 296.2 K
D1 0.6999999 sec
TD0 1
***** CHANNEL f1 *****
NUC1 1H
P1 10.62 usec
PL1 -5.00 dB
SFO1 300.1313008 MHz
F2 - Processing parameters
SI 32768
SF 300.1300000 MHz
WDW EM
SSB 0
LB 0.30 Hz
GB 0
PC 1.00

```

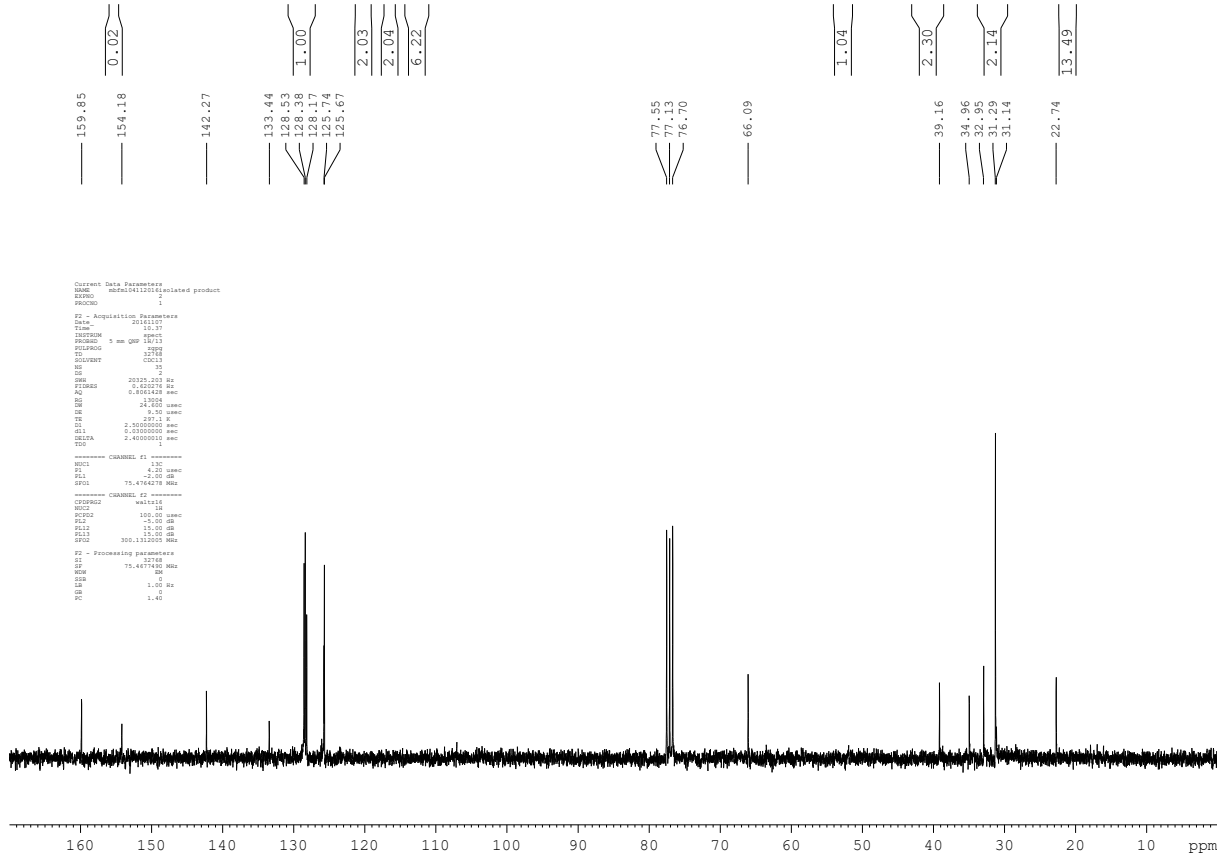

```

Current Data Parameters
NAME hbh81911101isolated product
EXPNO 1
PROCNO 1
F2 - Acquisition Parameters
Date_ 20161107
Time 10:37
INSTRUM spect
PROBHD 5 mm QNP 1H/1
PULPROG zgpg30
TD 32768
SOLVENT CDCl3
NS 32
DS 4
SWH 20250.205 Hz
FIDRES 0.616176 Hz
AQ 0.8081428 sec
RG 1286.4
SQ 100.33 usec
DE 24.000 usec
TE 296.2 K
D1 2.5000000 sec
d11 0.0300000 sec
DELTA 2.4000000 sec
TD0 1
***** CHANNEL f1 *****
NUC1 13C
P1 4.20 usec
PL1 -5.00 dB
SFO1 75.4854278 MHz
***** CHANNEL f2 *****
PROBHD WALT16
NUC2 1H
P2 100.00 usec
PL2 -5.00 dB
SFO2 400.1464018 MHz
PROBHD WALT16
NUC2 13C
P12 11.00 usec
PL12 -5.00 dB
SFO12 300.1313008 MHz
F2 - Processing parameters
SI 32768
SF 75.4677480 MHz
WDW EM
SSB 0
LB 1.00 Hz
GB 0
PC 1.40

```

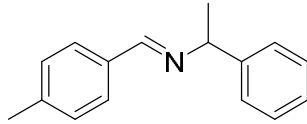

24i

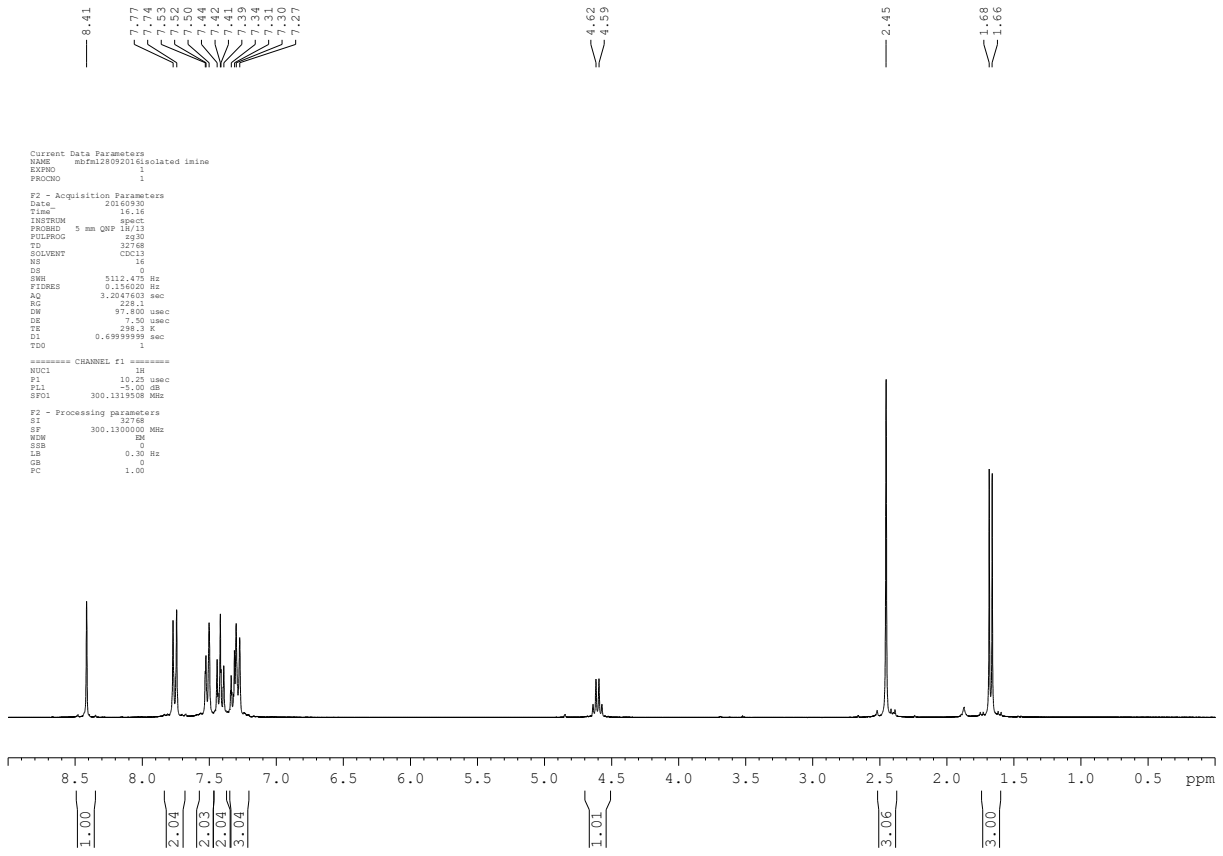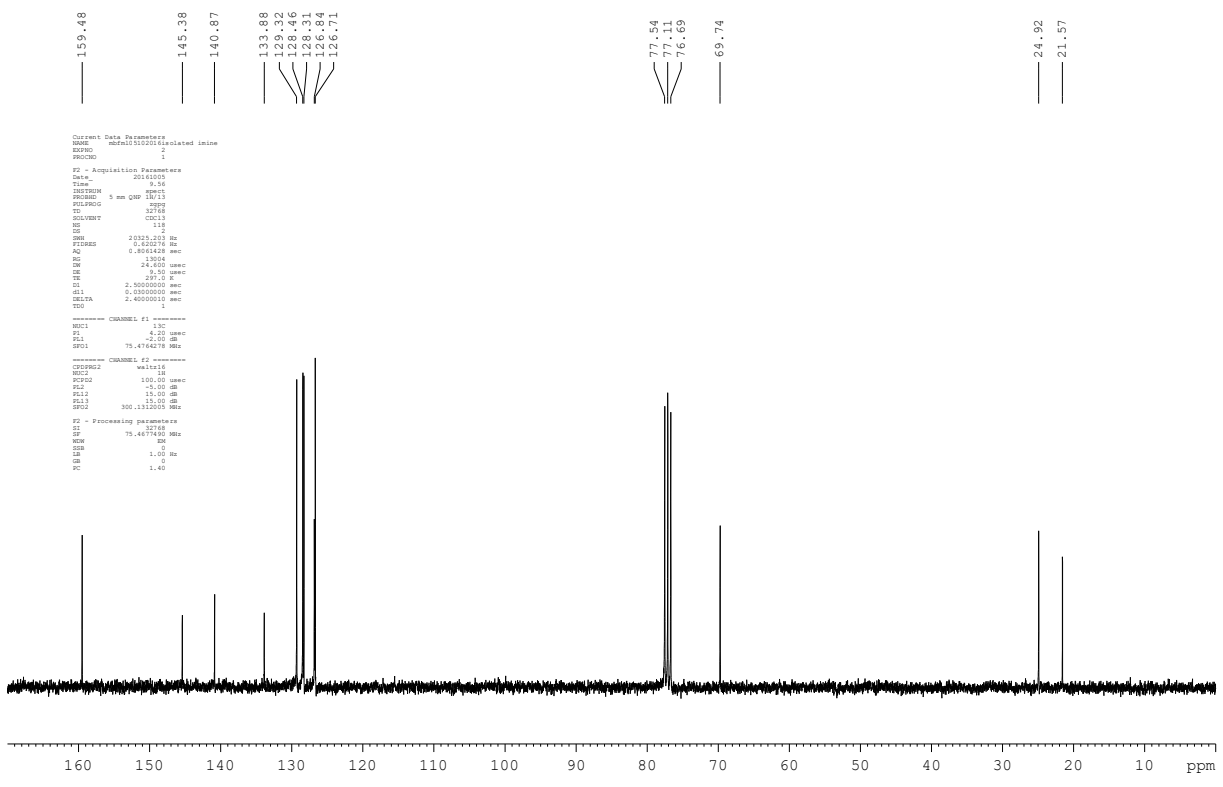

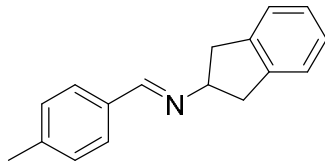

**24j**

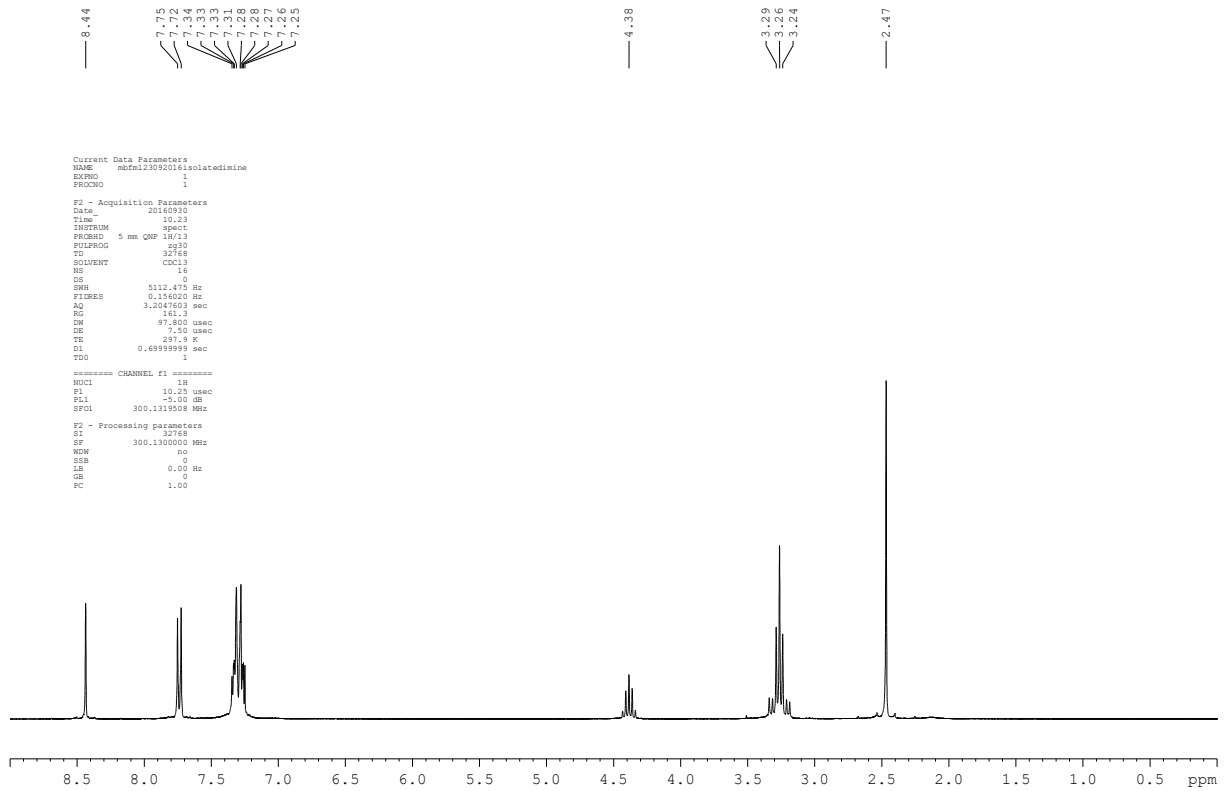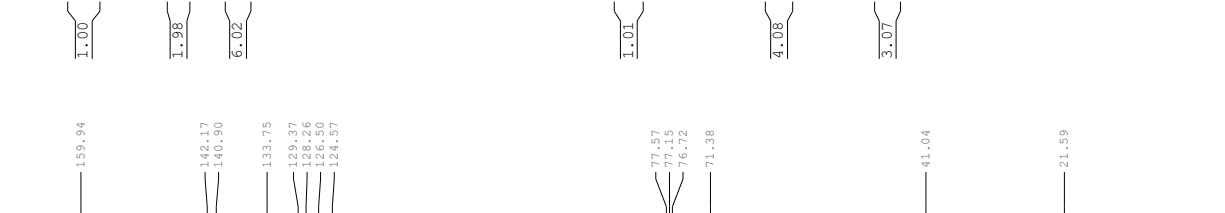

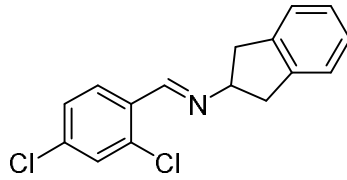

24k

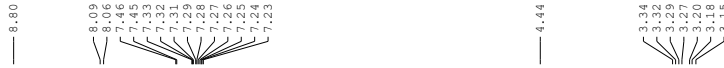

```
Current Data Parameters
NAME  mbfm125102016isolatedimine
EXPNO  1
PROCNO  1

F2 - Acquisition Parameters
Date_  20161027
Time  15.29
INSTRUM  spect
PROBHD  5 mm QNP 1H/13
PULPROG  zgpg
TD  32768
SOLVENT  CDCl3
NS  16
DS  0
SWH  5112.475 Hz
FIDRES  0.136205 Hz
AQ  3.2047603 sec
RG  456.2
DM  97.800 usec
DE  7.40 usec
TE  296.2 K
D1  0.65999999 sec
TDO  0
```

```
===== CHANNEL f1 =====
NUC1  1H
P1  10.25 usec
PL1  -1.00 dB
SFO1  300.1315000 MHz

F2 - Processing parameters
SI  32768
SF  300.1310000 MHz
WDW  EM
SSB  0
LB  0.30 Hz
GB  0
PC  1.00
```

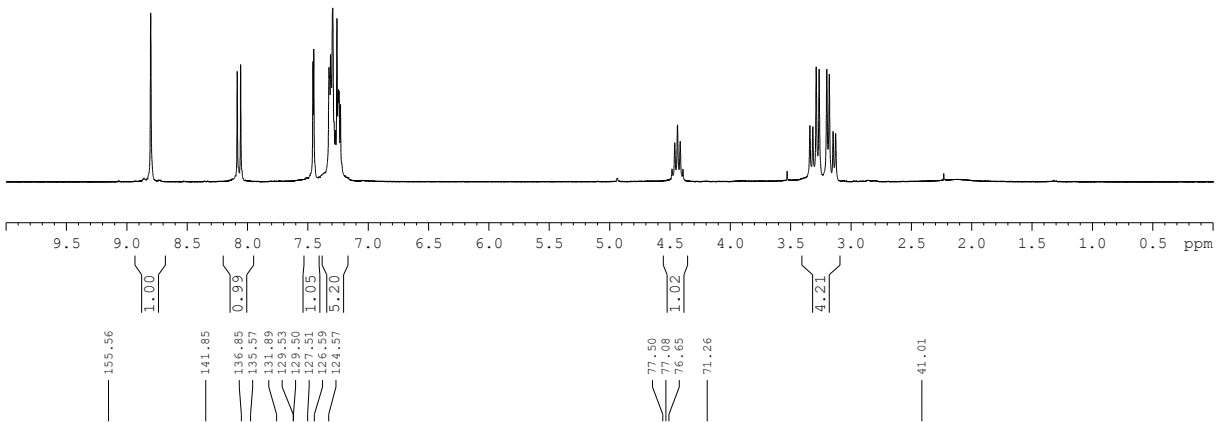

```
Current Data Parameters
NAME  mbfm125102016isolatedimine
EXPNO  1
PROCNO  1

F2 - Acquisition Parameters
Date_  20161027
Time  15.44
INSTRUM  spect
PROBHD  5 mm QNP 1H/13
PULPROG  zgpg
TD  32768
SOLVENT  CDCl3
NS  247
DS  0
SWH  20325.275 Hz
FIDRES  0.620278 Hz
AQ  0.8563428 sec
RG  13004
DM  24.800 usec
DE  33.50 usec
TE  297.2 K
D1  2.5000000 sec
d11  0.0300000 sec
SOLVTA  2.40000010 sec
TDO  1
```

```
===== CHANNEL f1 =====
NUC1  13C
P1  4.20 usec
PL1  +1.00 dB
SFO1  75.4764278 MHz

===== CHANNEL f2 =====
CPDPRG2  waltz16
NUC2  1H
PCPD2  100.00 usec
PL2  +5.00 dB
PL12  15.00 dB
PL13  15.00 dB
SFO2  300.1312000 MHz

F2 - Processing parameters
SI  32768
SF  75.4677490 MHz
WDW  EM
SSB  0
LB  1.00 Hz
GB  0
PC  1.40
```

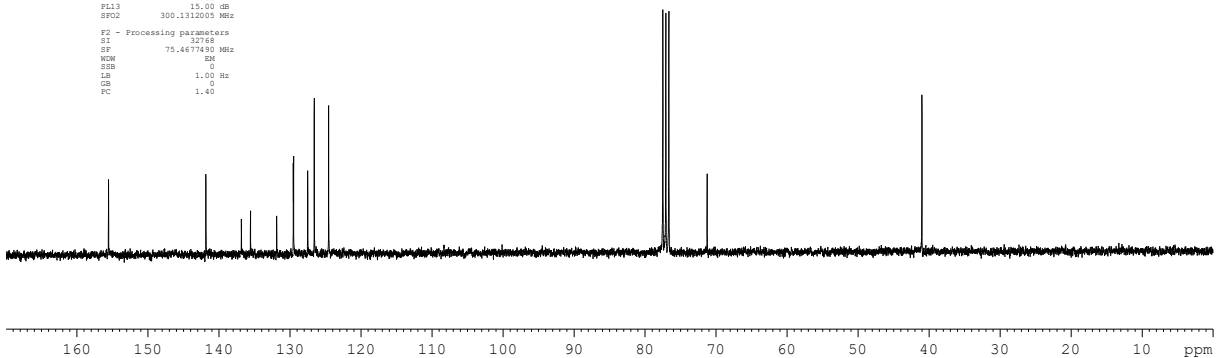

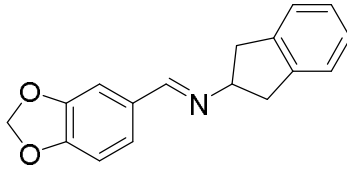

241

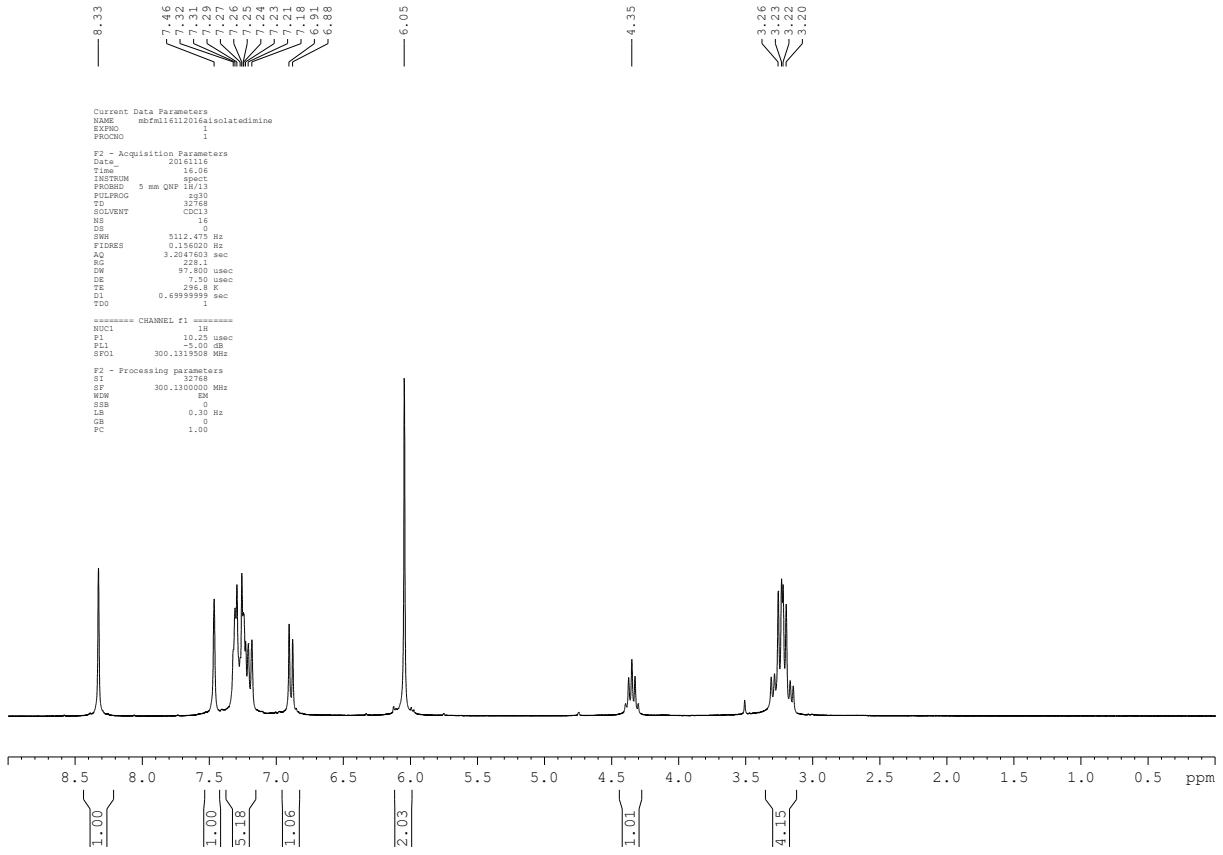

```

Current Data Parameters
NAME      hbFml16112016aIsolatedimine
EXPNO    1
PROCNO   1

F2 - Acquisition Parameters
Date_    20161116
Time     16.06
INSTRUM  spect
PROBHD   5 mm QNP 1H/13
PULPROG  zgpg30
TD       32768
SOLVENT  CDCl3
NS       16
DS       0
SWH      5112.475 Hz
FIDRES   0.156020 Hz
AQ       3.2047603 sec
RG       228.1
CW       97.800 usec
DE       7.50 usec
TE       296.8 K
D1       0.69999999 sec
TD0      1

===== CHANNEL f1 =====
NUC1     1H
P1       10.00 usec
PL1      -5.00 dB
SFO1     300.1315900 MHz

F2 - Processing parameters
SI       32768
SF       300.1300000 MHz
WDW      EM
SSB      0
LB       0.50 Hz
GB       0
PC       1.00
  
```

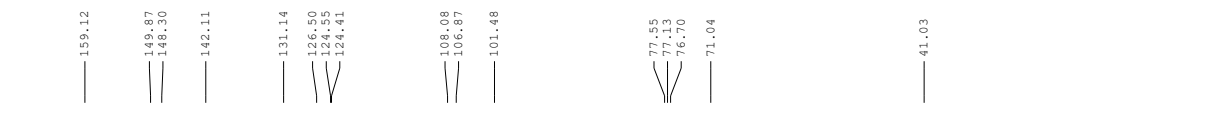

```

Current Data Parameters
NAME      hbFml16112016aIsolatedimine
EXPNO    1
PROCNO   1

F2 - Acquisition Parameters
Date_    20161116
Time     16.23
INSTRUM  spect
PROBHD   5 mm QNP 1H/13
PULPROG  zgpg30
TD       32768
SOLVENT  CDCl3
NS       16
DS       0
SWH      20325.200 Hz
FIDRES   0.622278 Hz
AQ       0.8041428 sec
RG       22084
CW       24.800 usec
DE       25.00 usec
TE       296.8 K
D1       2.50000000 sec
SFO1     100.6283500 MHz
DETA     2.40000010 sec
TD0      1

===== CHANNEL f1 =====
NUC1     13C
P1       4.20 usec
PL1      -2.00 dB
SFO1     75.4764278 MHz

===== CHANNEL f2 =====
CPDPRG2  waltz16
NUC2     1H
P2P2     100.00 usec
PL12     19.00 dB
PL13     19.00 dB
SFO2     300.1315900 MHz
SFO3     300.1315900 MHz

F2 - Processing parameters
SI       32768
SF       75.4677628 MHz
WDW      EM
SSB      0
LB       2.00 Hz
GB       0
PC       1.00
  
```

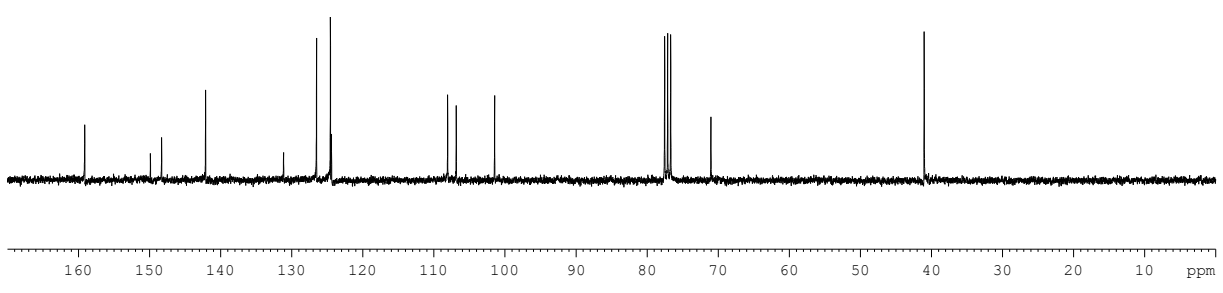

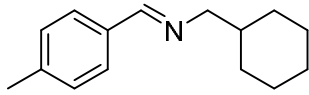

**24m** (contained 7% of homocoupled imine)

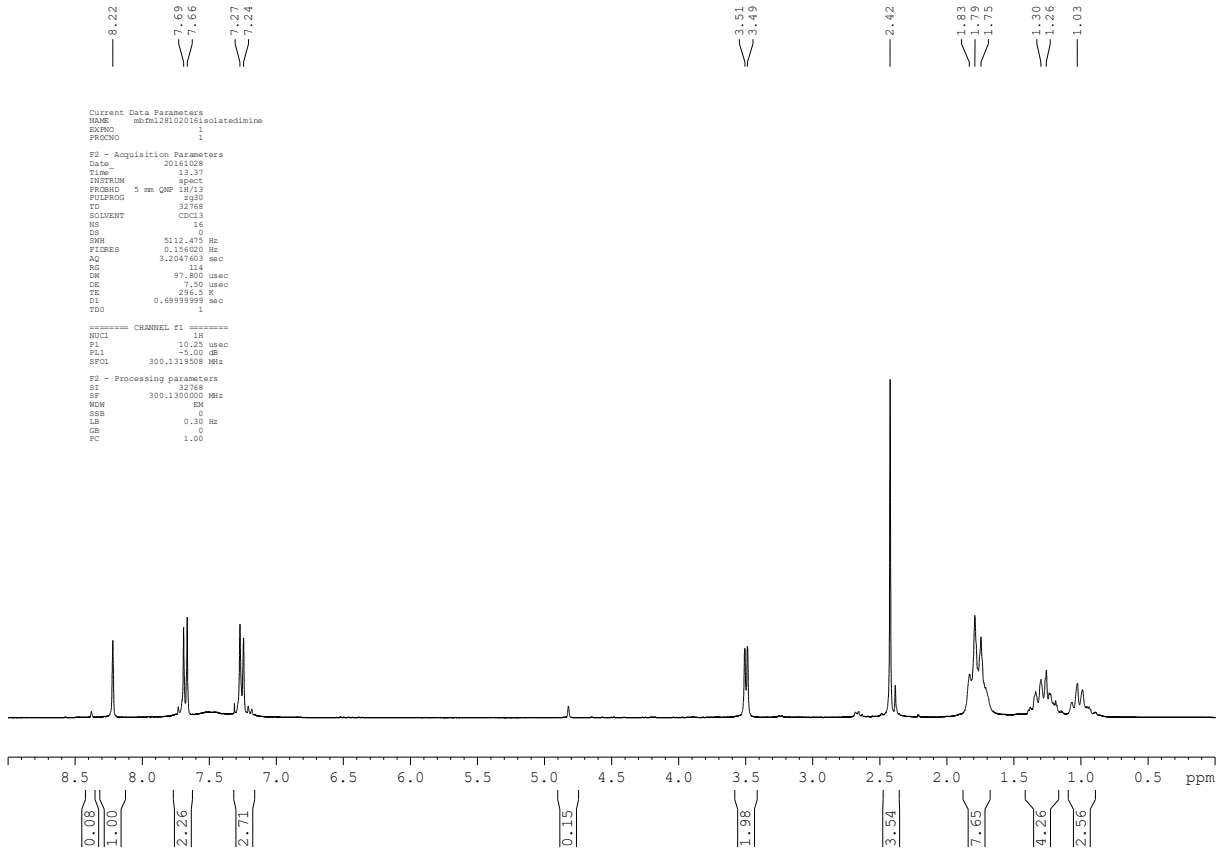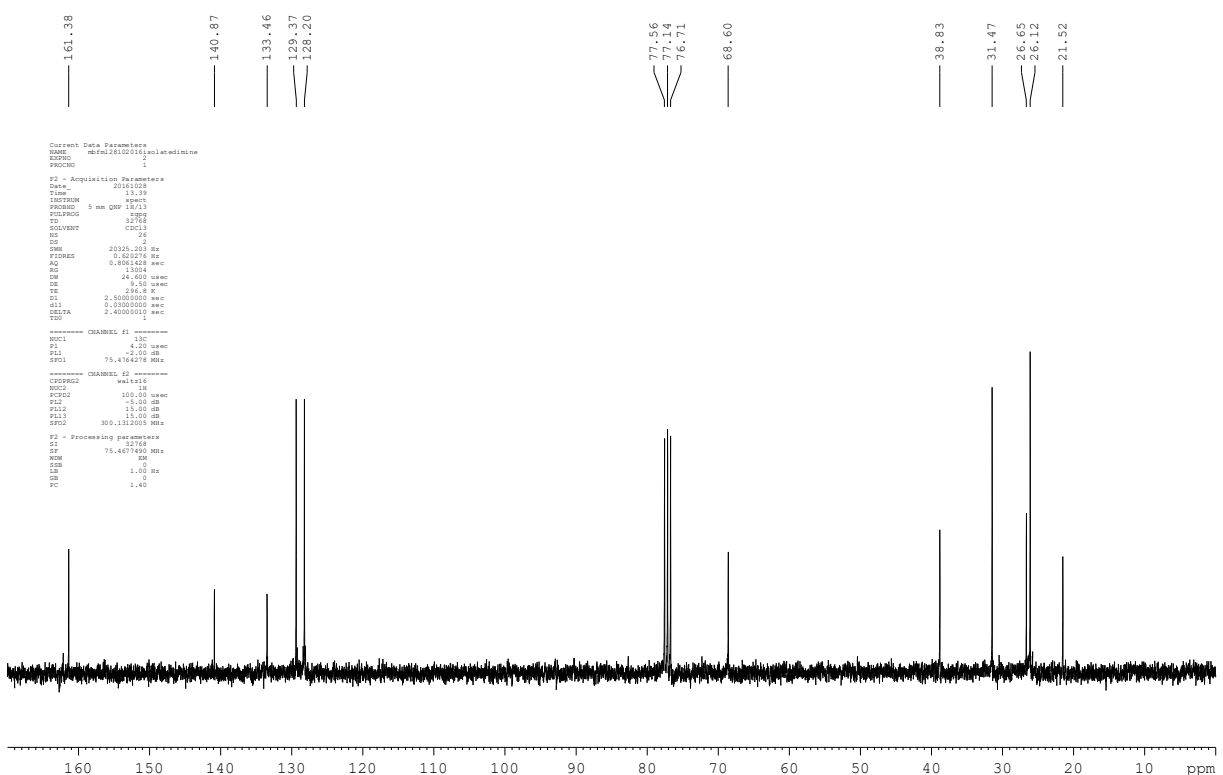



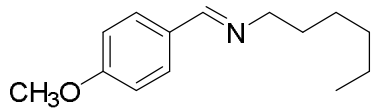

**24n** (contained 7% of homocoupled imine)

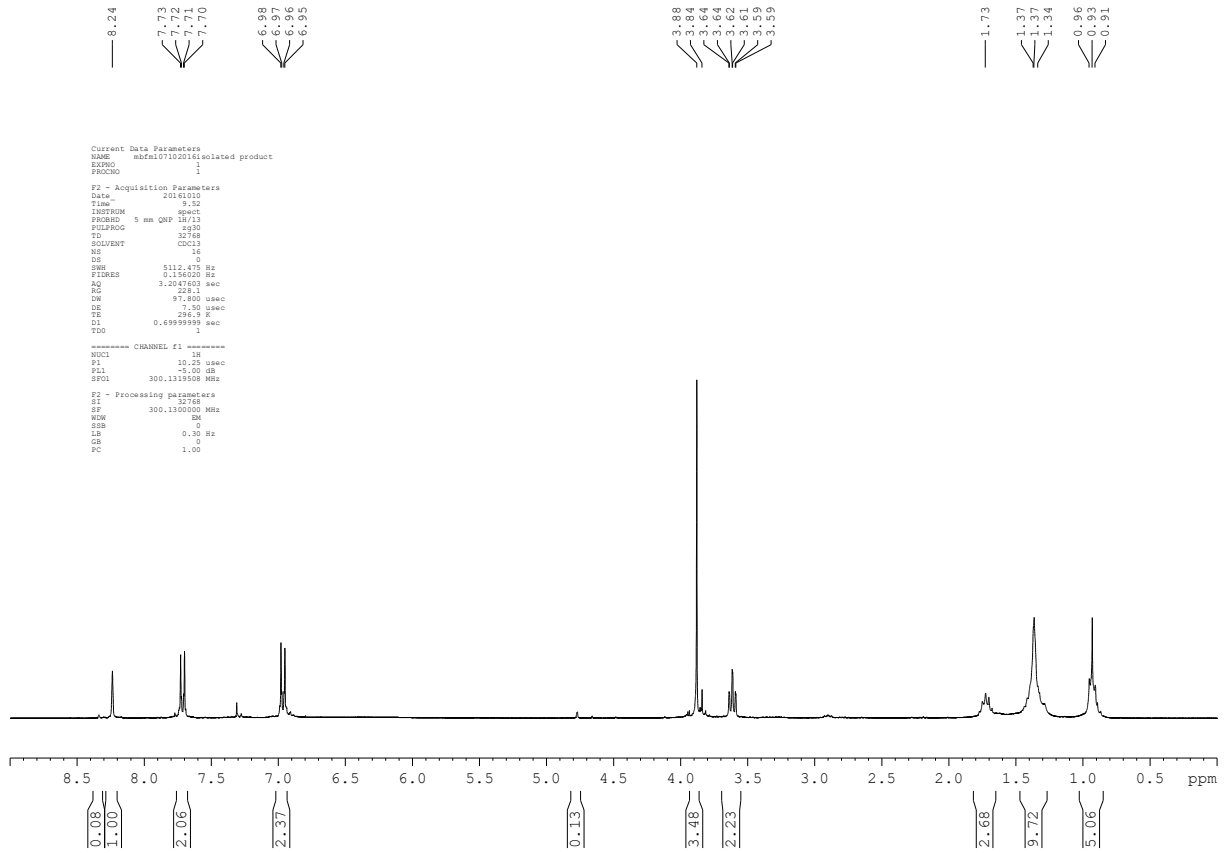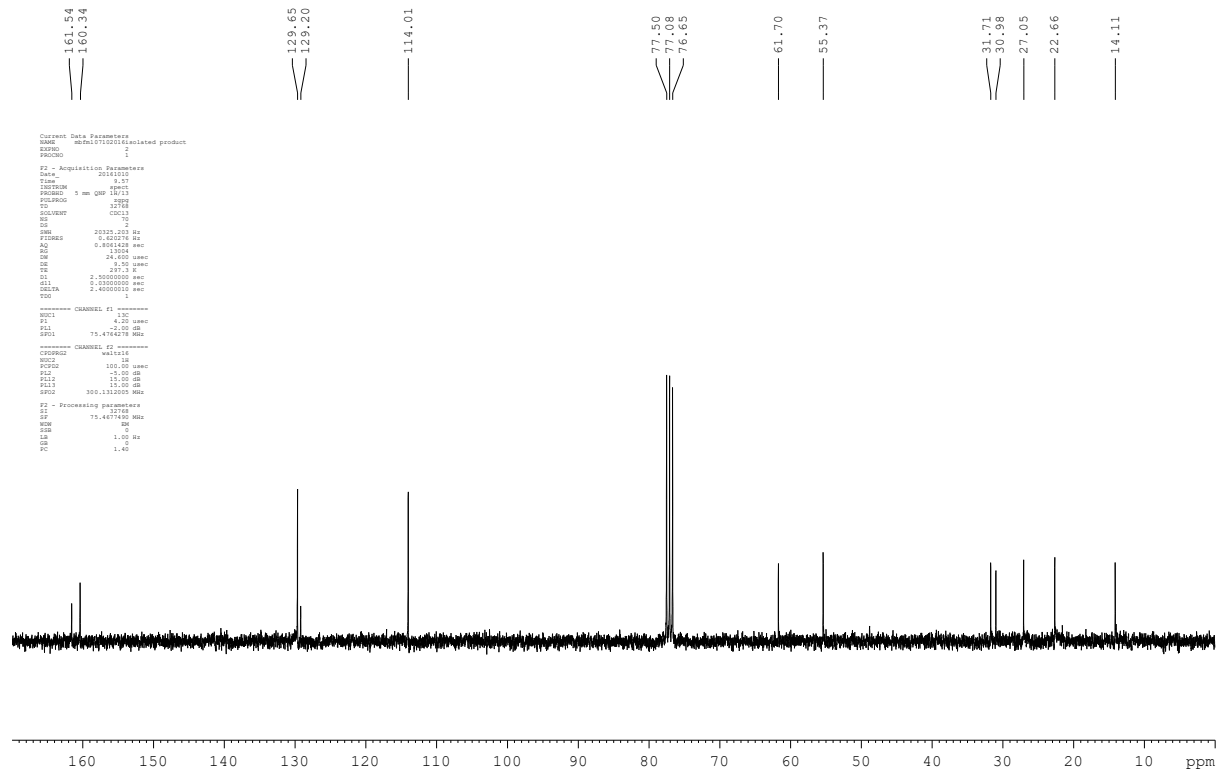

```

Current Data Parameters
NAME      hdm10710201isolated product
EXPNO    1
PROCNO   1

F2 - Acquisition Parameters
Date_    20161010
Time     9.52
INSTRUM  spect
PROBHD   5 mm QNP 1H/13
PULPROG  zgpg30
TD       32768
SOLVENT  CDCl3
NS       16
DS       0
SWH      512.475 Hz
FIDRES   0.156020 Hz
AQ       3.341503 sec
RG       228.1
DE       87.800 usec
OE       1.50 usec
TE       298.2 K
D1       0.69999999 sec
TD

----- CHANNEL f1 -----
NUC1     13C
P1       10.00 usec
PL1     -1.50 dB
SFO1    100.628359 MHz

F2 - Processing parameters
SI       32768
SF       100.628359 MHz
WDW      EM
SSB      0
LB       0.30 Hz
GB       0
PC       1.00

----- CHANNEL f2 -----
CPROG2   zgpg30
NUC2     13C
P2       10.00 usec
PL2     -1.50 dB
PL12    19.00 dB
PL11    19.00 dB
SFO2    100.628359 MHz

F2 - Processing parameters
SI       32768
SF       125.760350 MHz
WDW      EM
SSB      0
LB       1.00 Hz
GB       0
PC       1.40
  
```

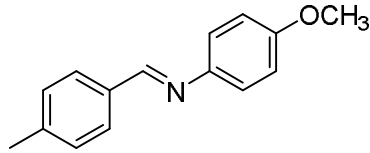

24o

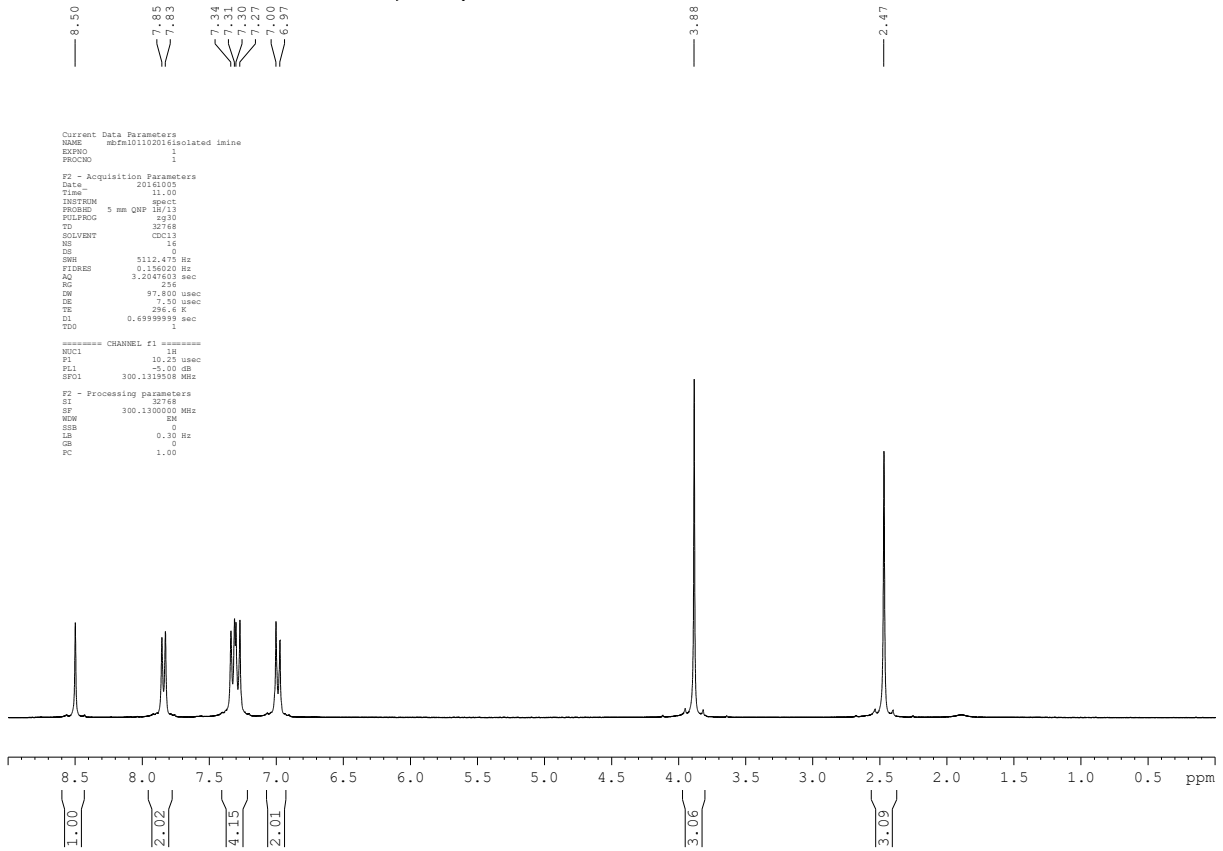

```

Current Data Parameters
NAME: mfm101102016isolated imine
EXPNO: 1
PROCNO: 1

F2 - Acquisition Parameters
Date_: 20161003
Time: 11.00
INSTRUM: spect
PROBHD: 5 mm QNP 1H/13
PULPROG: zg30
TD: 65536
SOLVENT: CDCl3
NS: 2768
DS: 4
SWH: 512.475 Hz
FIDRES: 0.136000 Hz
AQ: 3.2047603 sec
RG: 256
DE: 97.800 usec
EM: 7.50 usec
TE: 296.5 K
DQ: 0.6999999 sec
TD0: 1

===== CHANNEL f1 =====
NUC1: 13C
P1: 10.25 usec
PL1: -1.00 dB
SFO1: 300.1310000 MHz

F2 - Processing parameters
SI: 32768
SF: 300.1330000 MHz
WDW: EM
SSB: 0
LB: 0.30 Hz
GB: 0
PC: 1.00
  
```

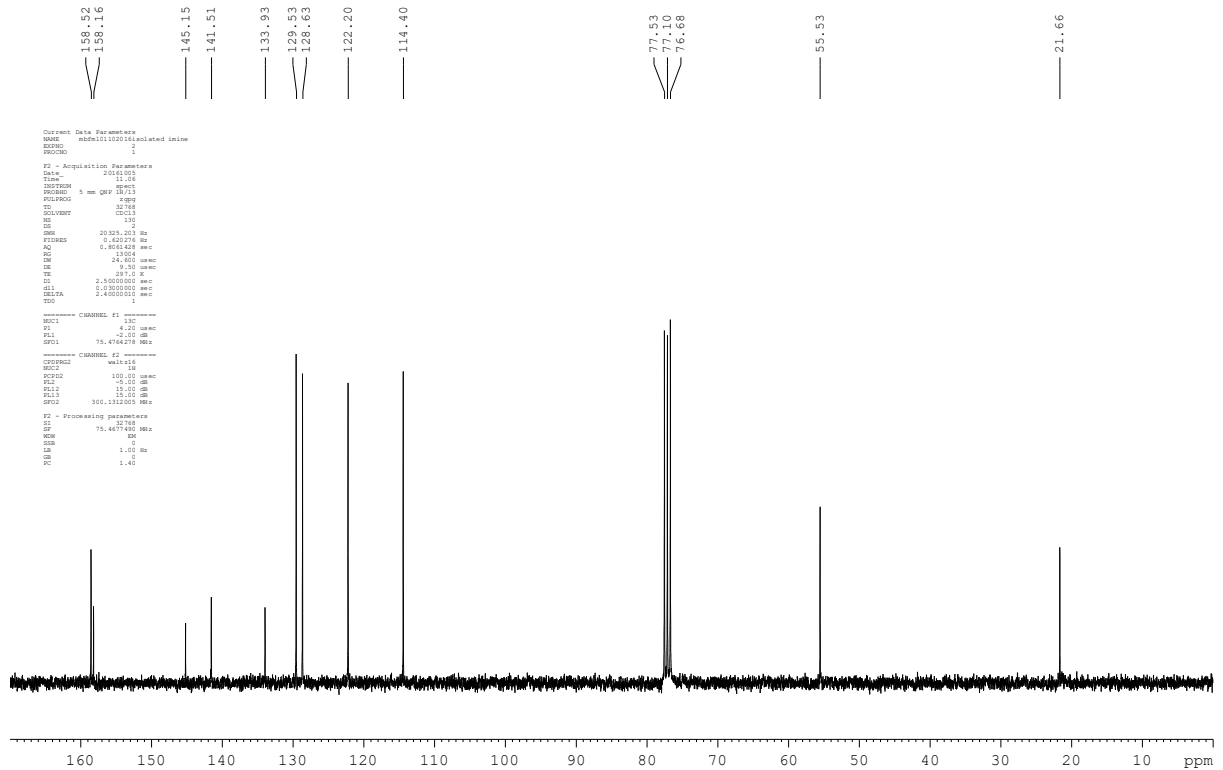

```

Current Data Parameters
NAME: mfm101102016isolated imine
EXPNO: 2
PROCNO: 2

F2 - Acquisition Parameters
Date_: 20161003
Time: 11.04
INSTRUM: spect
PROBHD: 5 mm QNP 1H/13
PULPROG: zgpg30
TD: 65536
SOLVENT: CDCl3
NS: 2768
DS: 4
SWH: 20331.000 Hz
FIDRES: 0.500276 Hz
AQ: 0.8084428 sec
RG: 13104
DE: 44.800 usec
EM: 291.0 K
DQ: 2.1000000 sec
SFO1: 101.6250000 MHz
SFO2: 75.4774780 MHz
TD0: 1

===== CHANNEL f1 =====
NUC1: 13C
P1: 10.25 usec
PL1: -1.00 dB
SFO1: 75.4774780 MHz

===== CHANNEL f2 =====
NAME: waht13
NUC2: 13C
PCPG2: 100.00 usec
P1: 15.00 usec
PL1: 0.00 dB
SFO2: 300.1320000 MHz

F2 - Processing parameters
SI: 32768
SF: 75.4677480 MHz
WDW: EM
SSB: 0
LB: 1.00 Hz
GB: 0
PC: 1.40
  
```

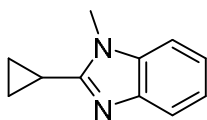

25a

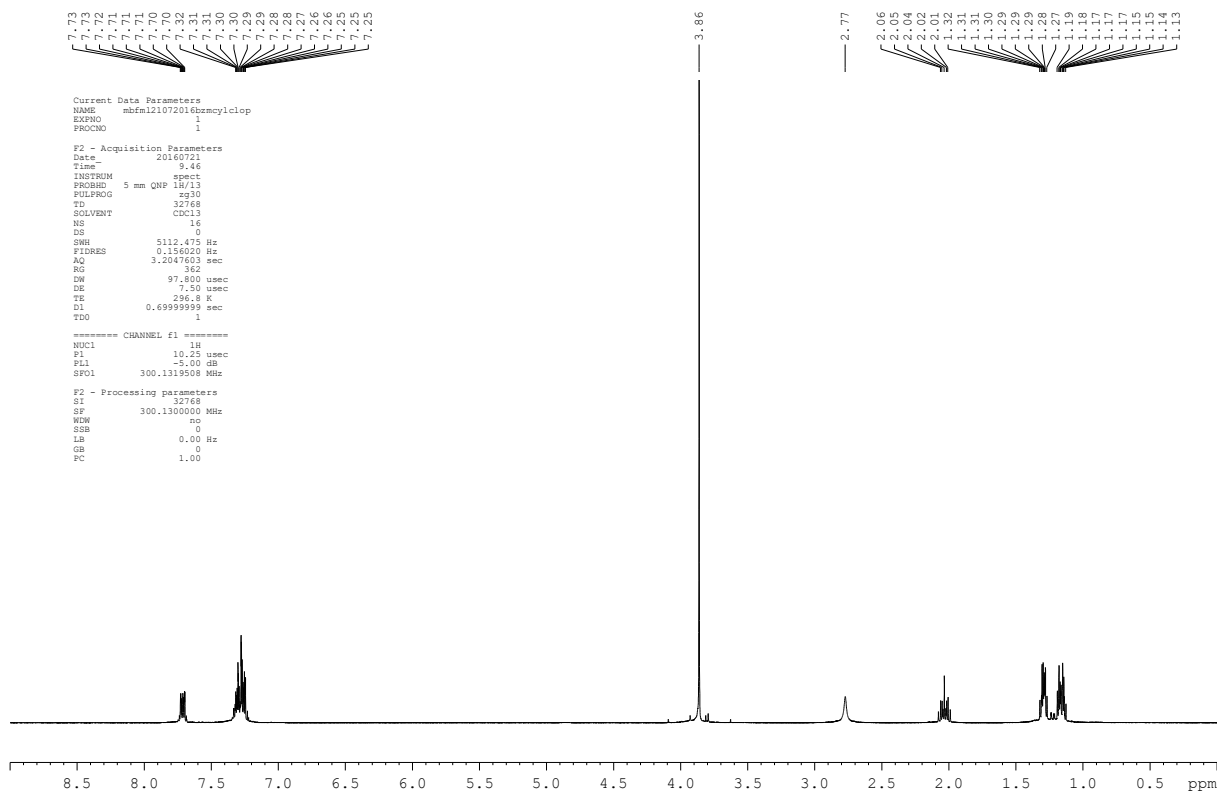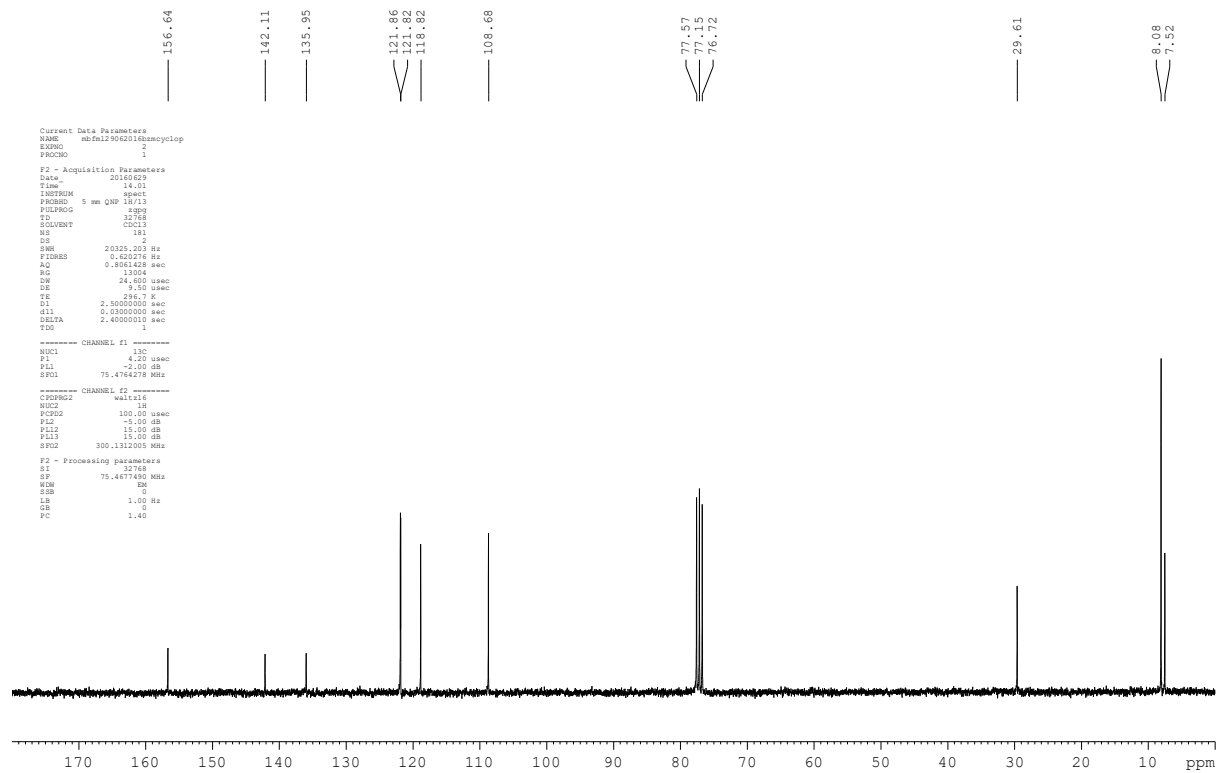

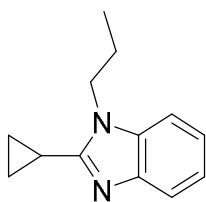

**25b**

7.72  
7.71  
7.70  
7.70  
7.69  
7.62  
7.31  
7.30  
7.29  
7.26  
7.24  
7.23  
7.22  
7.20

4.23  
4.18  
4.18

2.03  
2.02  
2.01  
2.00  
1.99  
1.99  
1.97  
1.95  
1.93  
1.88  
1.88  
1.31  
1.30  
1.29  
1.28  
1.15  
1.14  
1.13  
1.11  
1.11  
1.04  
1.01

<sup>1</sup>H NMR spectrum

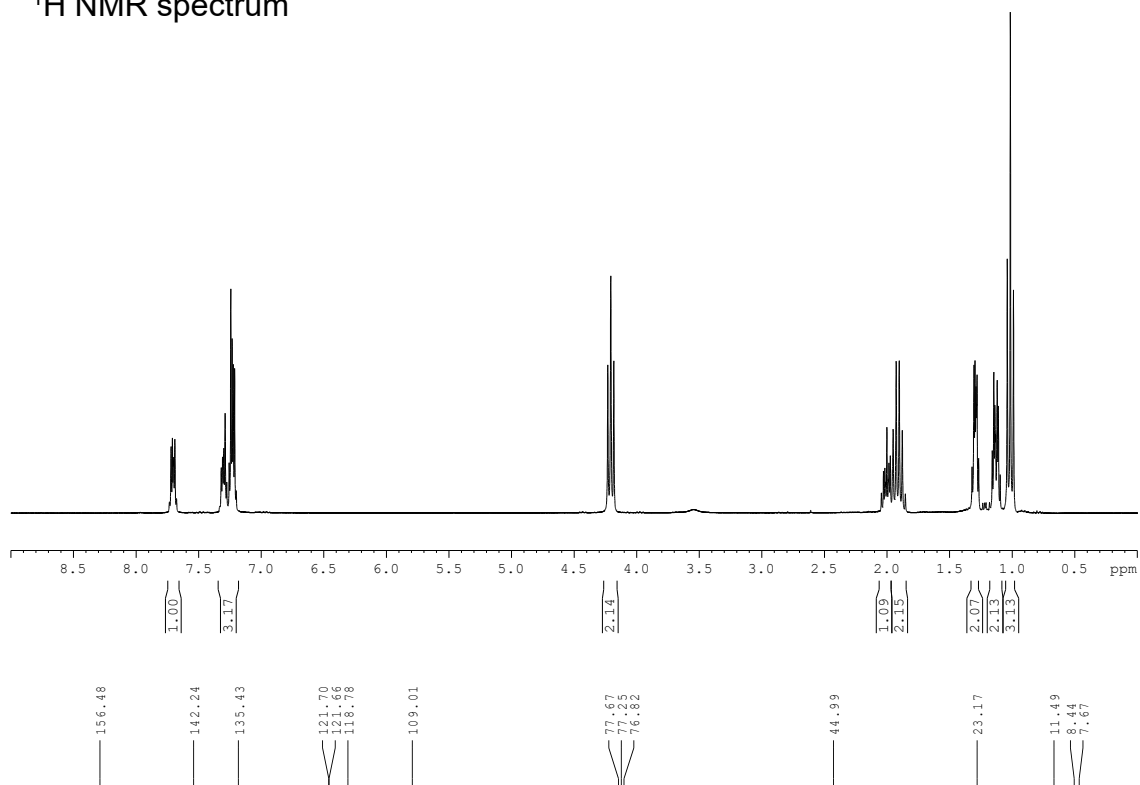

1D proton-decoupled <sup>13</sup>C NMR spectrum

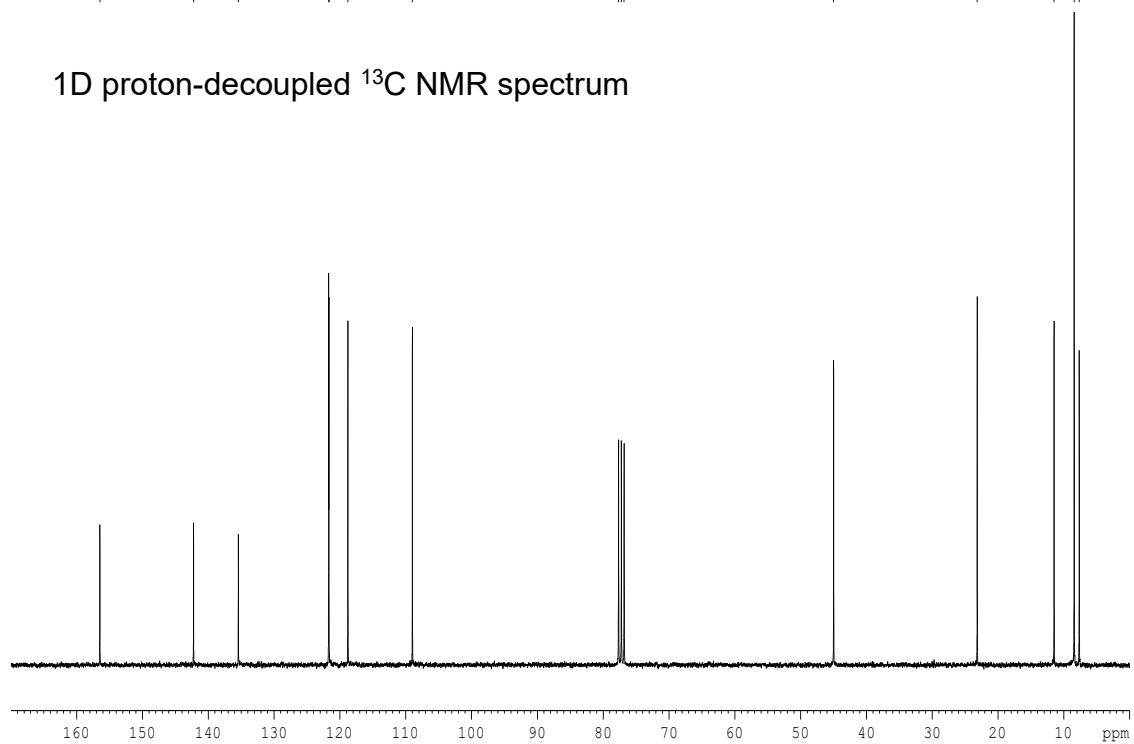

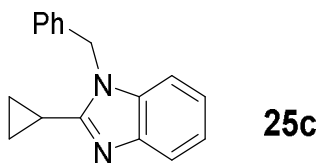

$^1\text{H}$  NMR spectrum

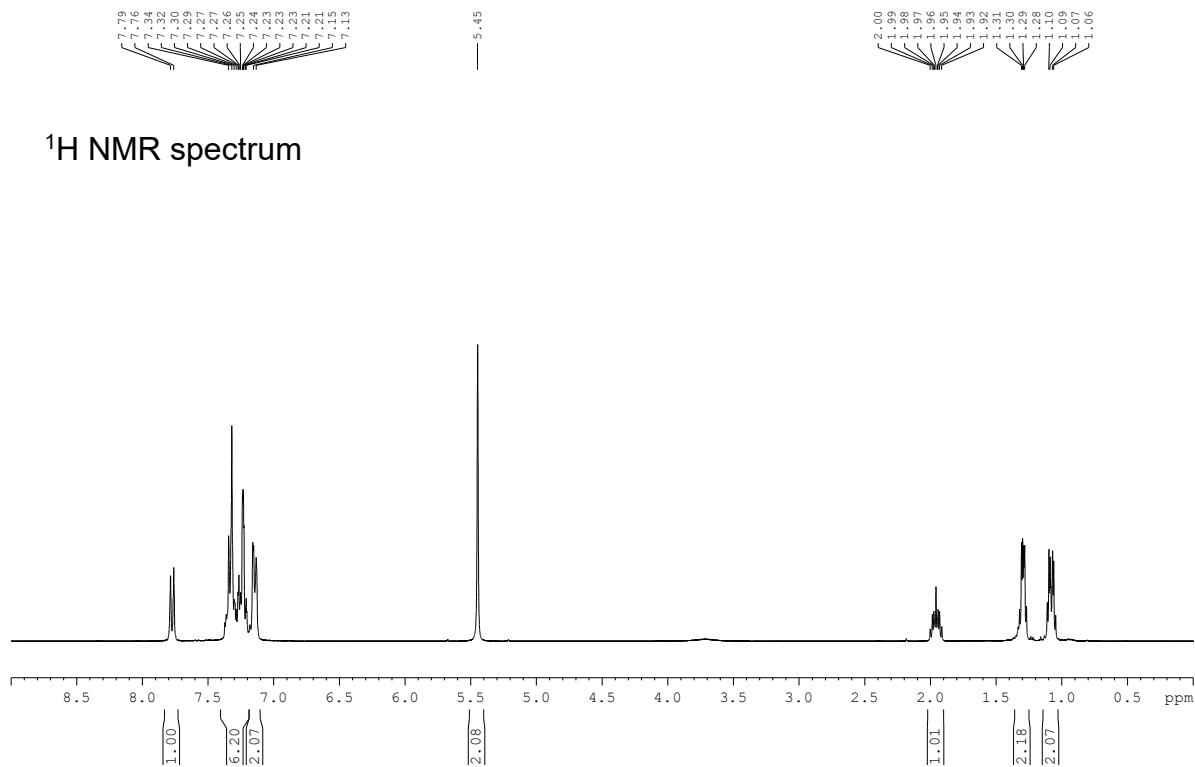

1D proton-decoupled  $^{13}\text{C}$  NMR spectrum

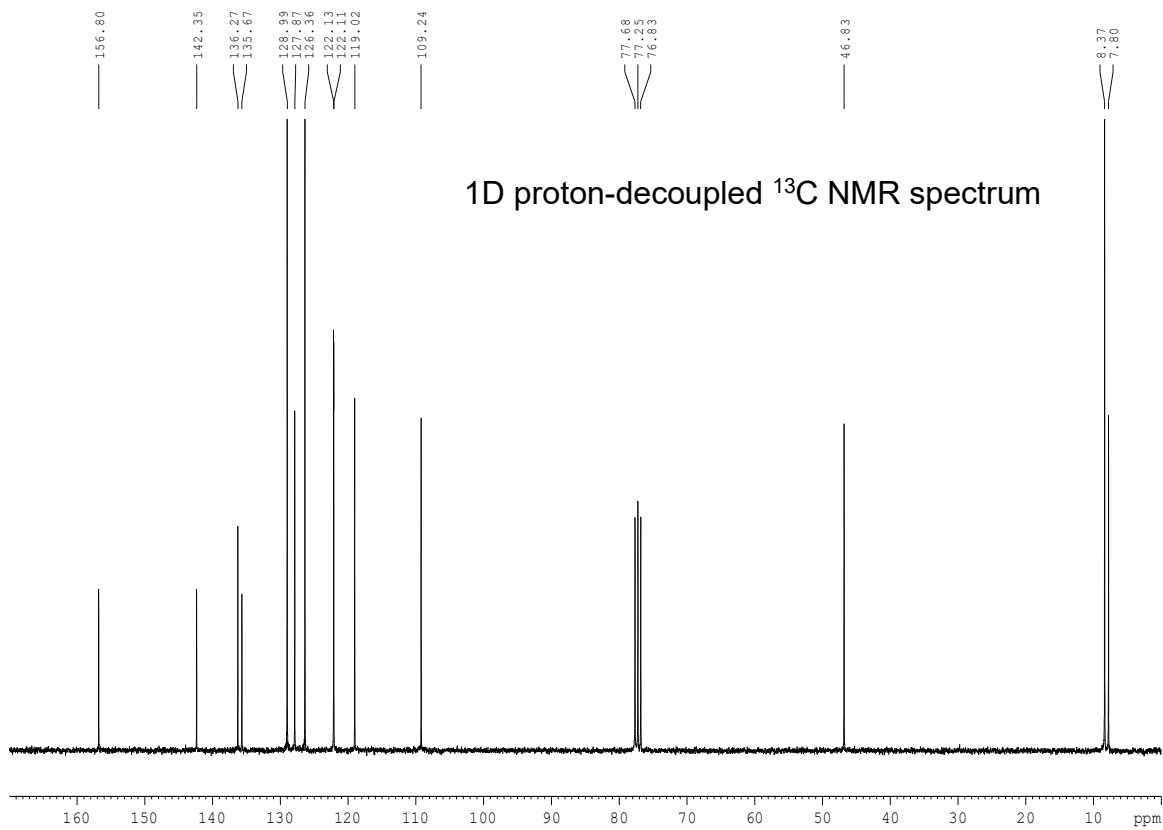

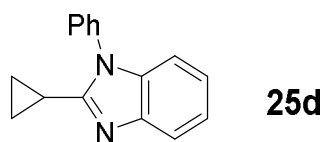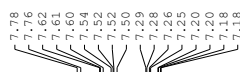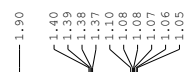

<sup>1</sup>H NMR spectrum

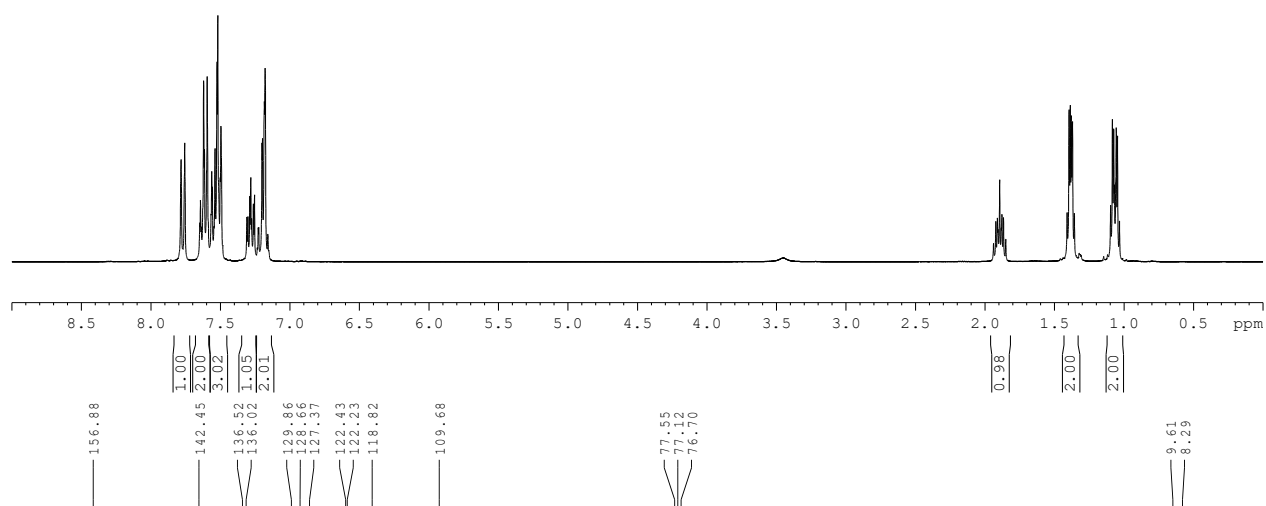

1D proton-decoupled <sup>13</sup>C NMR spectrum

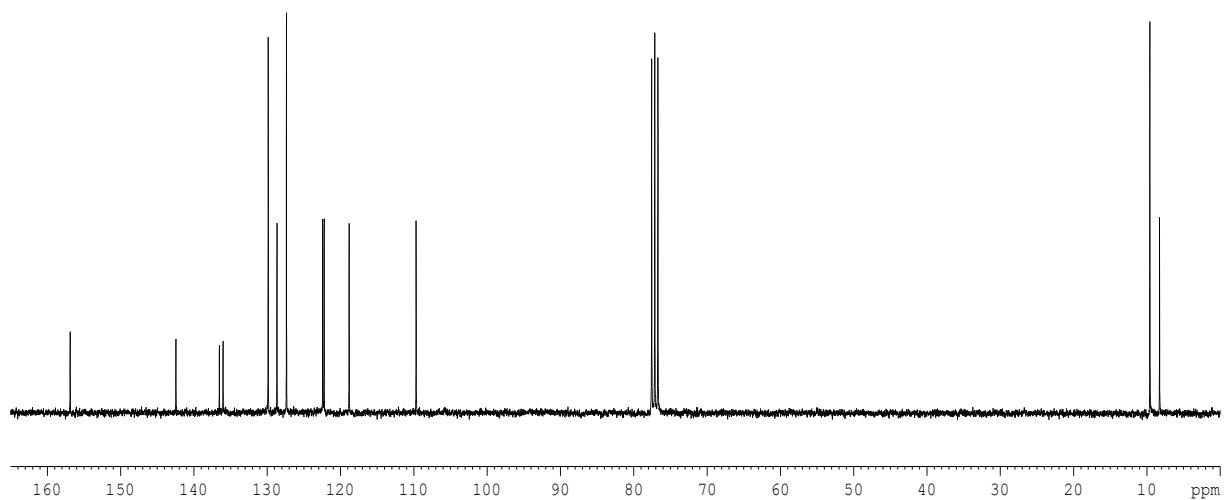

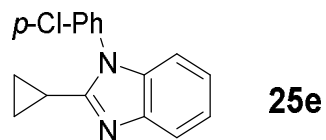

7.76  
7.73  
7.70  
7.46  
7.43  
7.30  
7.30  
7.28  
7.25  
7.25  
7.20  
7.17  
7.15  
7.12

1.87  
1.86  
1.84  
1.83  
1.38  
1.38  
1.37  
1.36  
1.36  
1.34  
1.10  
1.09  
1.08  
1.05  
1.04

<sup>1</sup>H NMR spectrum

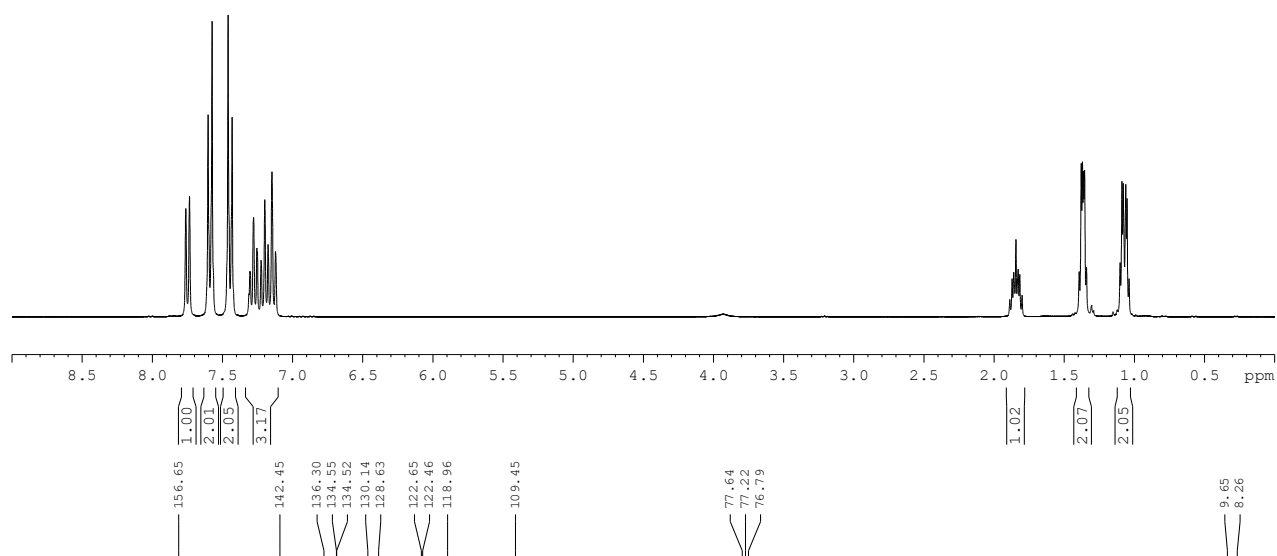

1D proton-decoupled <sup>13</sup>C NMR spectrum

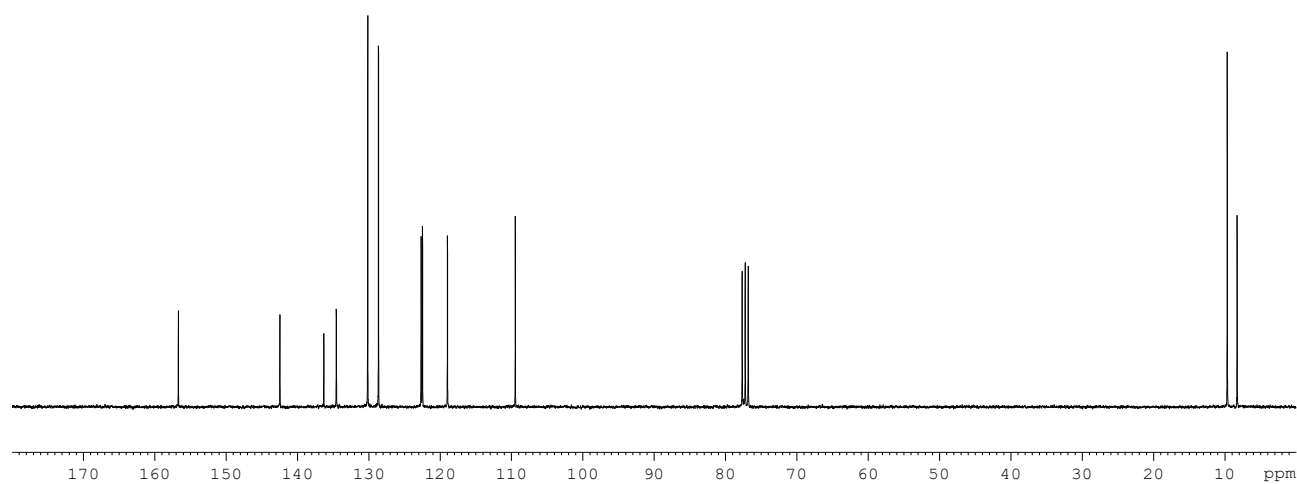

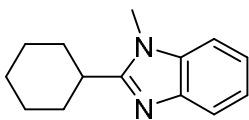

25f

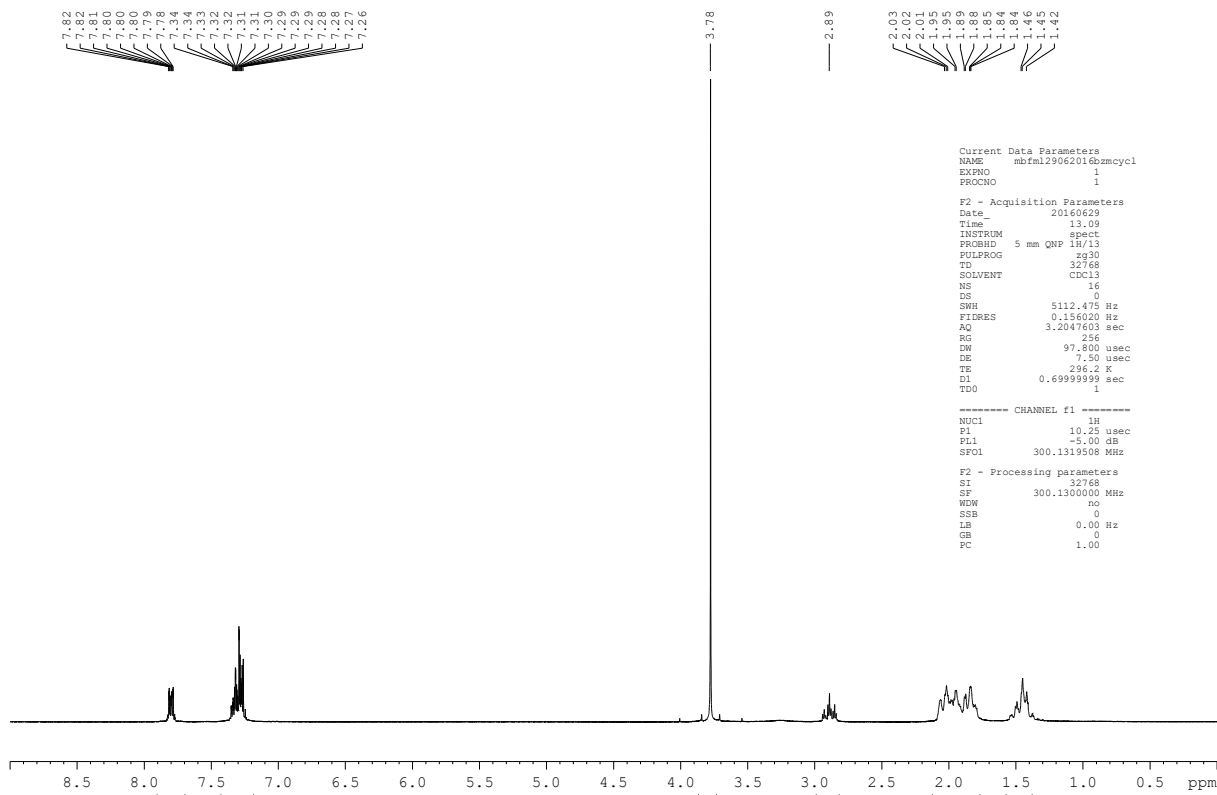

```
Current Data Parameters
NAME      mbfml29062016bzmycl
EXPNO    1
PROCNO   1

F2 - Acquisition Parameters
Date_    20160629
Time     13.09
INSTRUM  spect
PROBHD   5 mm QNP 1H/13
PULPROG  zgpg30
TD       32768
SOLVENT  CDCl3
NS       16
DS       0
SWH      5112.475 Hz
FIDRES   0.156030 Hz
AQ       3.2047603 sec
RG       256
DW       97.800 usec
DE       7.50 usec
TE       296.2 K
D1       0.69999999 sec
TDO      1

----- CHANNEL f1 -----
NUC1     13C
P1       10.25 usec
PL1      -5.00 dB
SFO1     300.1319508 MHz

F2 - Processing parameters
SI       32768
SF       300.1300000 MHz
WDW      no
SSB      0
LB       0.00 Hz
GB       0
PC       1.00
```

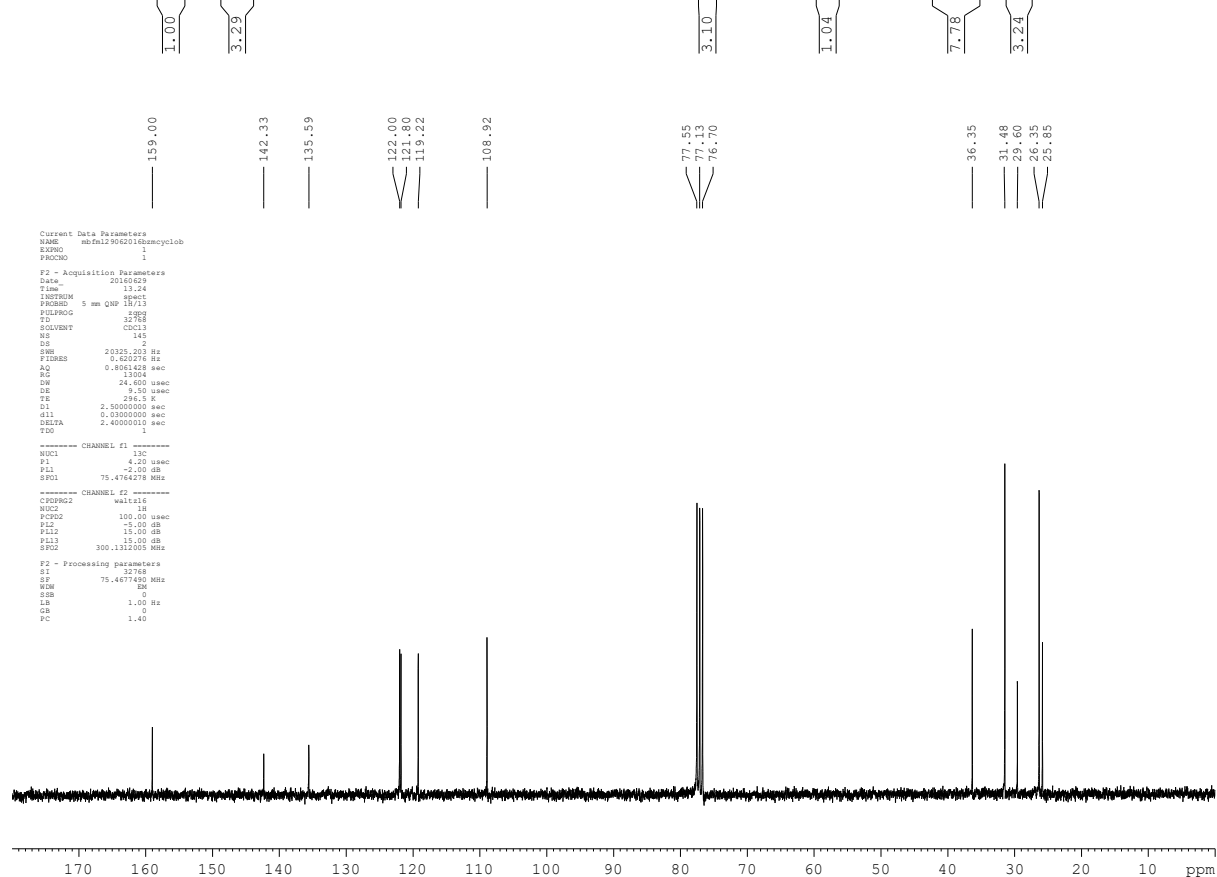

```
Current Data Parameters
NAME      mbfml29062016bzmycl
EXPNO    1
PROCNO   1

F2 - Acquisition Parameters
Date_    20160629
Time     13.24
INSTRUM  spect
PROBHD   5 mm QNP 1H/13
PULPROG  zgpg30
TD       32768
SOLVENT  CDCl3
NS       16
DS       0
SWH      20325.263 Hz
FIDRES   0.460276 Hz
AQ       0.8021428 sec
RG       13004
DW       24.600 usec
DE       9.50 usec
TE       296.5 K
D1       2.5000000 sec
d11      0.0300000 sec
DELTA    2.40000010 sec
TDO      1

----- CHANNEL f1 -----
NUC1     13C
P1       4.20 usec
PL1      -2.00 dB
SFO1     75.4764278 MHz

----- CHANNEL f2 -----
CPDPRG2  waltz16
NUC2     1H
PCPD2    100.00 usec
PL2      -1.00 dB
PL12     15.00 dB
PL13     15.00 dB
SFO2     300.1312005 MHz

F2 - Processing parameters
SI       32768
SF       75.4677490 MHz
WDW      no
SSB      0
LB       1.00 Hz
GB       0
PC       1.40
```



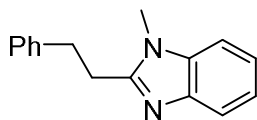

25g

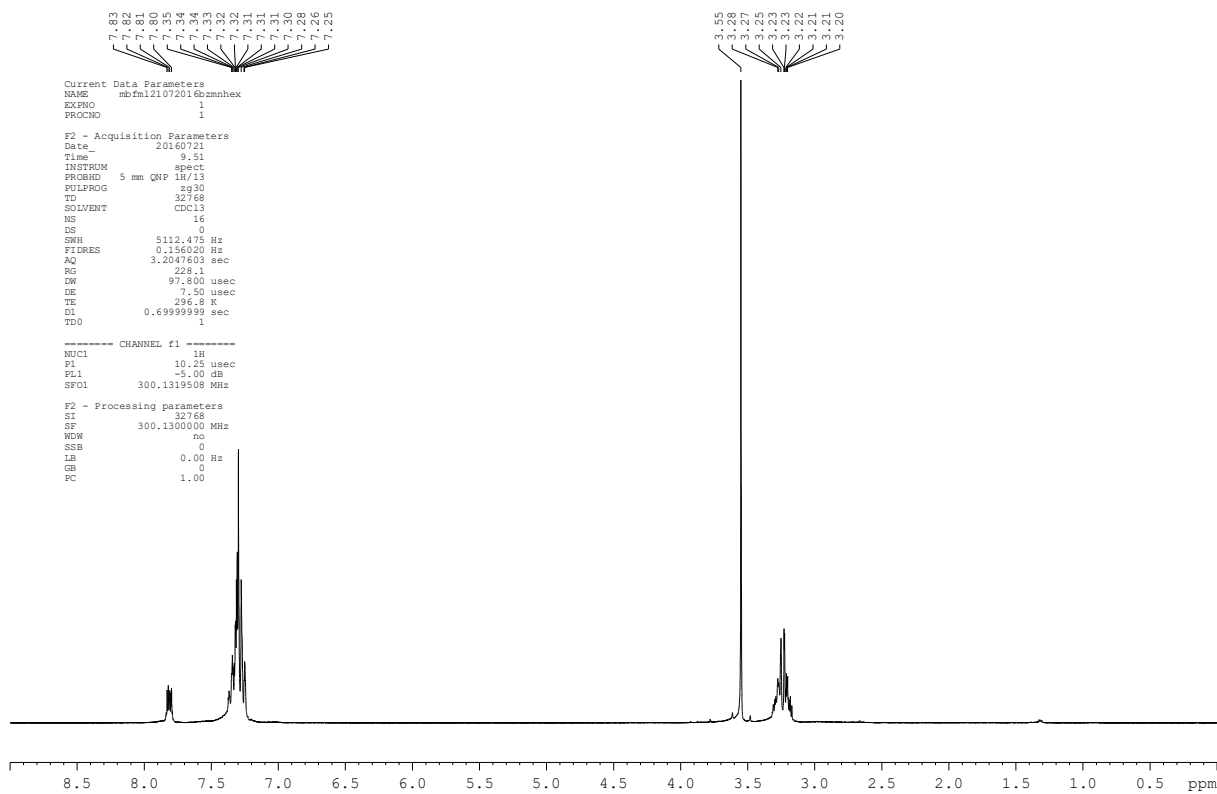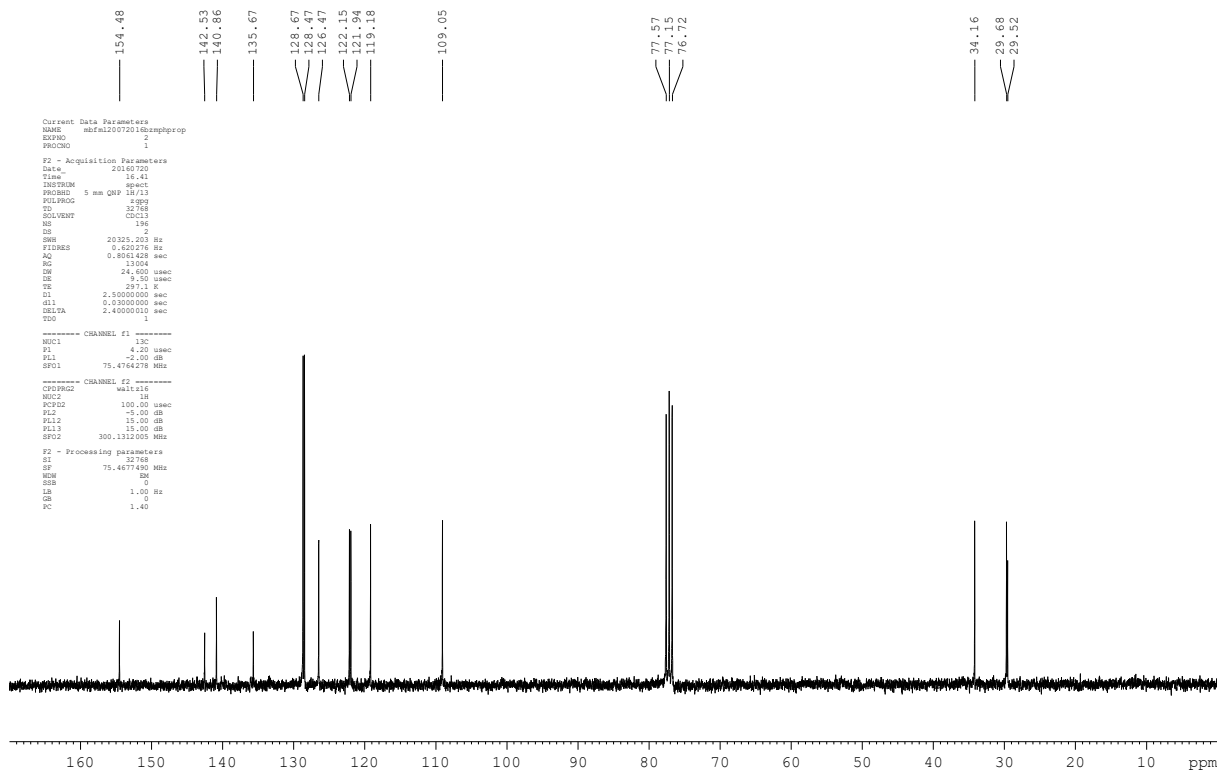

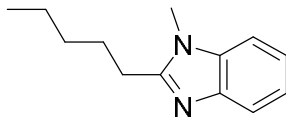

25h

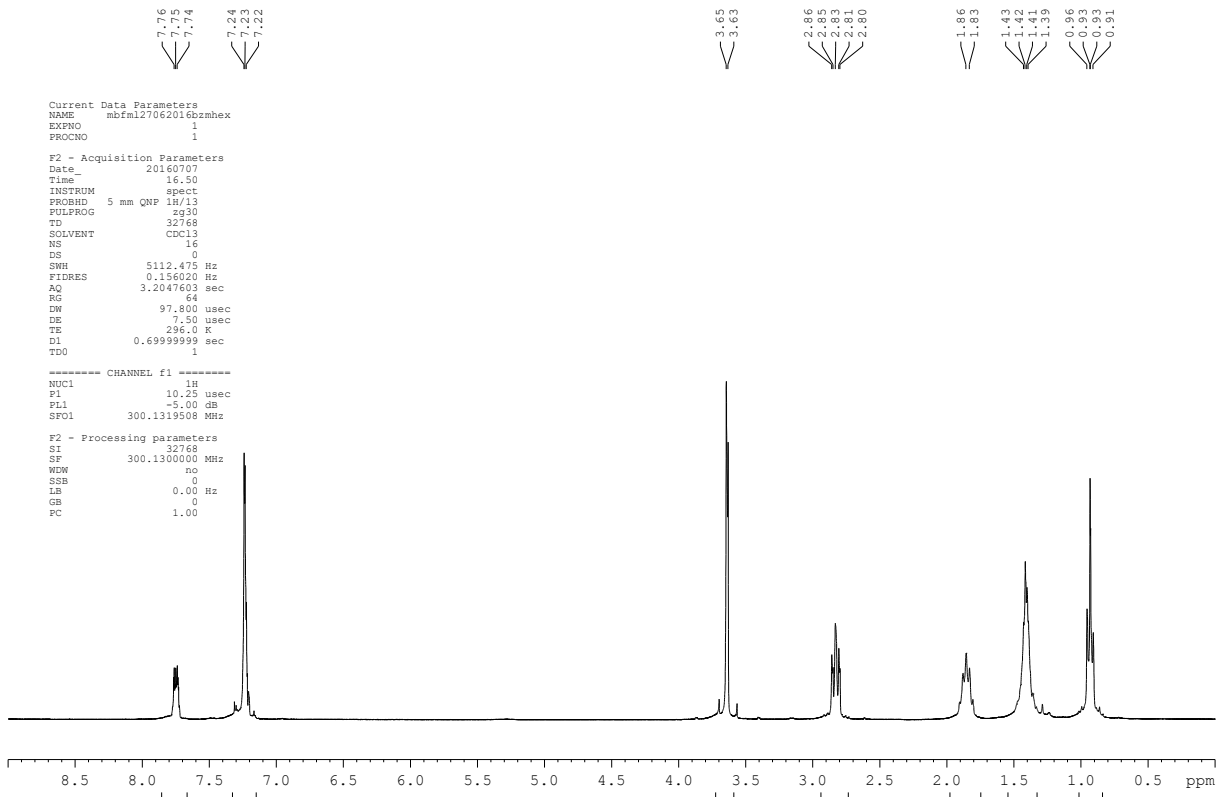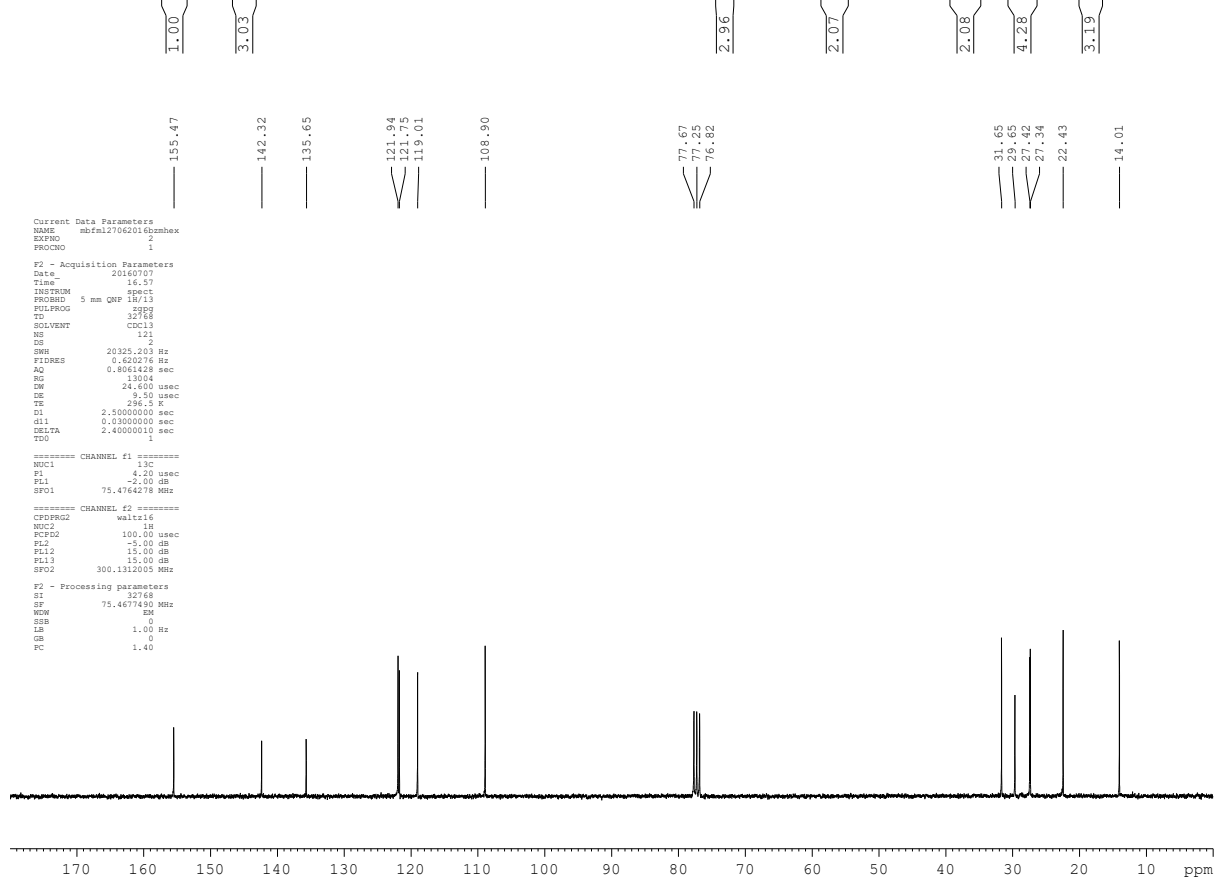

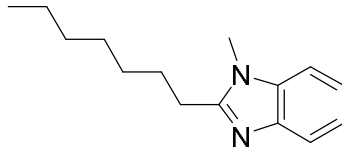

25i

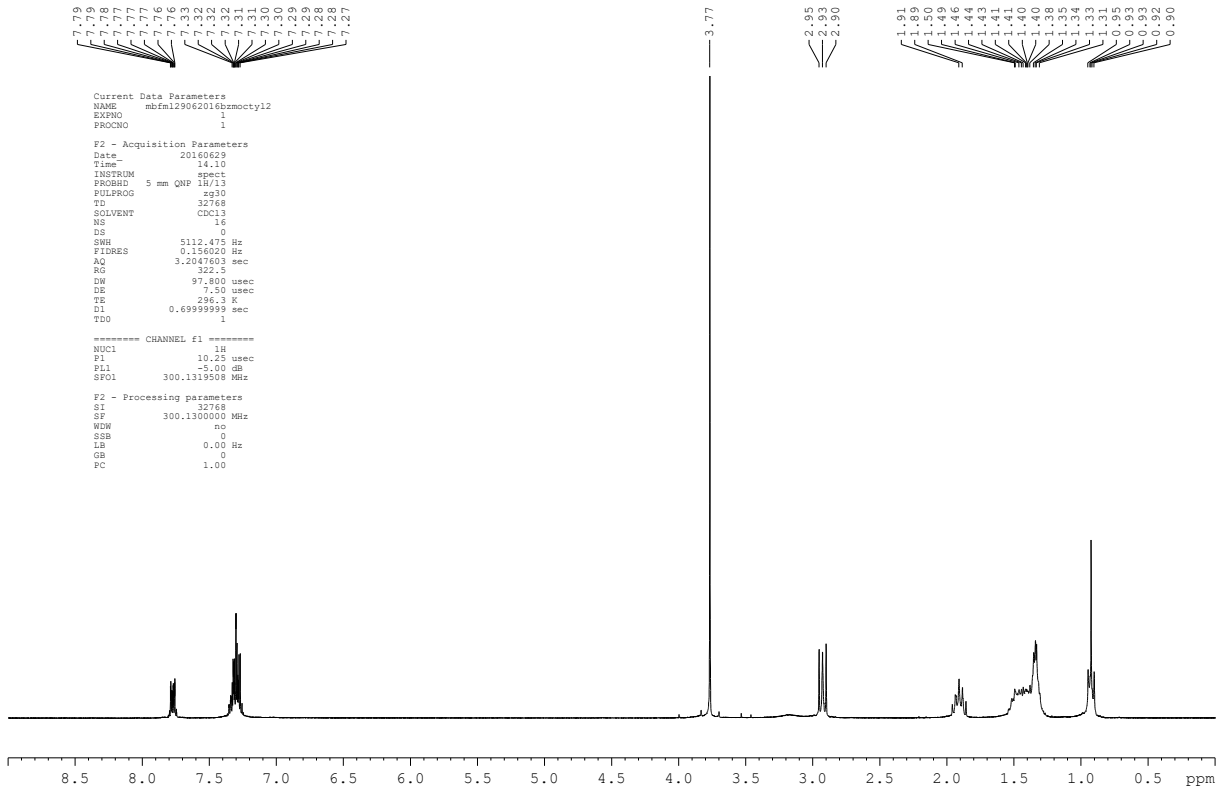

```

Current Data Parameters
NAME      mbfm129062016bzmoctyl2
EXPNO    1
PROCNO   1

F2 - Acquisition Parameters
Date_    20160629
Time     14.10
INSTRUM  spect
PROBHD   5 mm QNP 1H/13
PULPROG  zg30
TD       32768
SOLVENT  cdcl3
NS       16
DS       0
SWH      5112.475 Hz
FIDRES   0.156020 Hz
AQ       3.2047603 sec
RG       322.5
DM       97.800 usec
DE       7.50 usec
TE       296.3 K
D1       0.69959998 sec
TDO      1

===== CHANNEL f1 =====
NUC1     1H
P1       10.00 usec
PL1      -5.00 dB
SFO1    300.1319508 MHz

F2 - Processing parameters
SI       32768
SF       300.1300000 MHz
WDW      no
SSB      0
LB       0.00 Hz
GB       0
PC       1.00
  
```

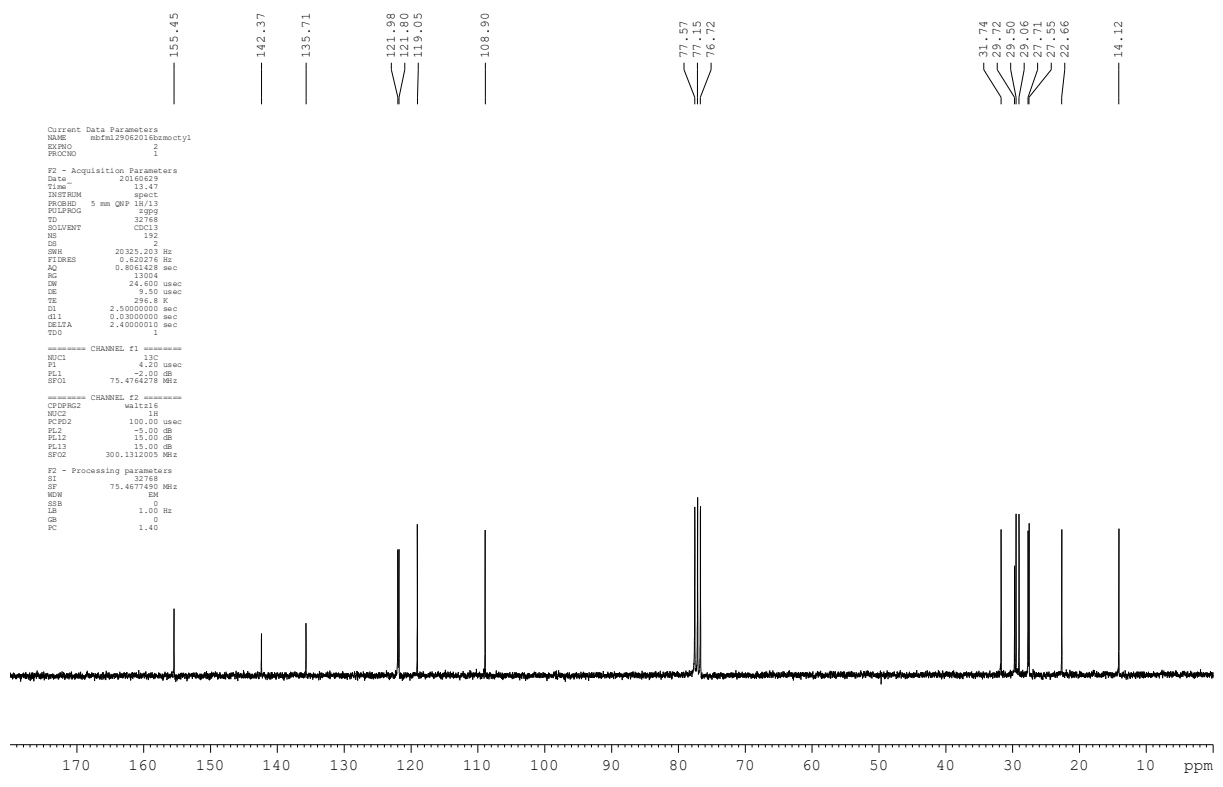

```

Current Data Parameters
NAME      mbfm129062016bzmoctyl2
EXPNO    1
PROCNO   1

F2 - Acquisition Parameters
Date_    20160629
Time     13.47
INSTRUM  spect
PROBHD   5 mm QNP 1H/13
PULPROG  zgpg30
TD       65536
SOLVENT  cdcl3
NS       192
DS       4
SWH      20325.203 Hz
FIDRES   0.620236 Hz
AQ       0.8061428 sec
RG       1300.4
DM       24.600 usec
DE       5.50 usec
TE       296.8 K
D1       2.5000000 sec
d11      0.0300000 sec
DELTA    2.4000000 sec
TDO      1

===== CHANNEL f1 =====
NUC1     13C
P1       4.20 usec
PL1      -1.00 dB
SFO1    75.4764278 MHz

===== CHANNEL f2 =====
CPDPRG2  waltz16
NUC2     1H
PCPD2    100.00 usec
PL2      -5.00 dB
PL12     15.00 dB
PL13     15.00 dB
SFO2    300.1311059 MHz

F2 - Processing parameters
SI       32768
SF       75.467450 MHz
WDW      EM
SSB      0
LB       1.00 Hz
GB       0
PC       1.40
  
```

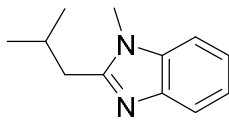

25j

7.70  
7.69  
7.68  
7.67  
7.66  
7.65  
7.64  
7.63  
7.62  
7.61  
7.60

3.51  
2.65  
2.62  
2.00  
2.18  
0.97  
0.95

Current Data Parameters  
NAME mbfm128072016bzmisop  
EXPNO 1  
PROCNO 1

F2 - Acquisition Parameters  
Date\_ 20160708  
Time 9.51  
INSTRUM spect  
PROBHD 5 mm QNP 1H/13  
PULPROG zg30  
TD 32768  
SOLVENT CDCl3  
NS 16  
DS 0  
SWH 5112.475 Hz  
FIDRES 0.156020 Hz  
AQ 3.2047603 sec  
RG 32  
DM 97.800 usec  
DE 7.50 usec  
TE 296.3 K  
D1 0.69999999 sec  
TDO 1

----- CHANNEL f1 -----  
NUC1 1H  
P1 10.25 usec  
PL1 -5.00 dB  
SFO1 300.1319508 MHz

F2 - Processing parameters  
SI 32768  
SF 300.1300000 MHz  
WDW no  
SSB 0  
LB 0.00 Hz  
GB 0  
PC 1.00

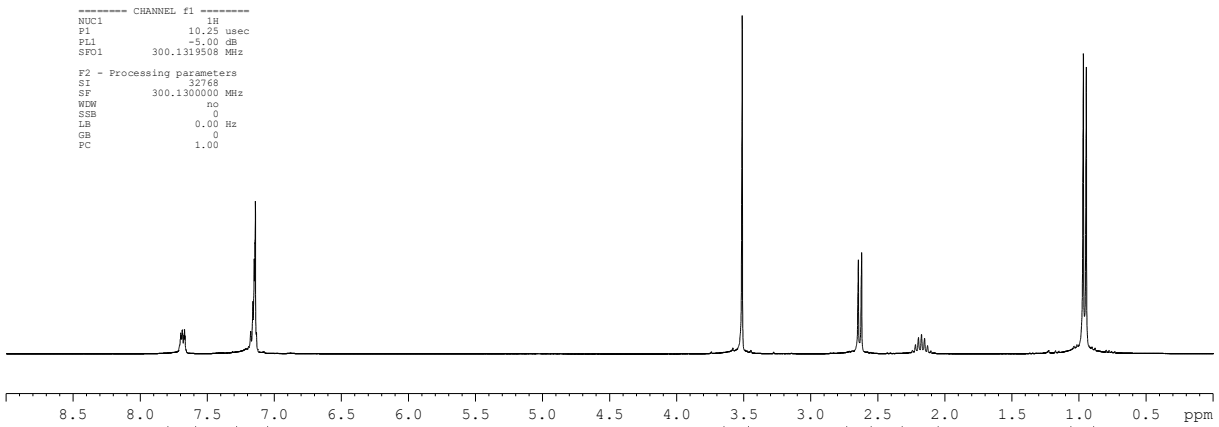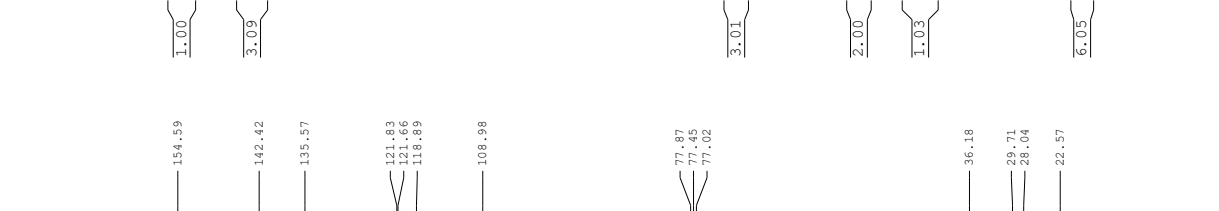

Current Data Parameters  
NAME mbfm128072016bzmisop  
EXPNO 1  
PROCNO 1

F2 - Acquisition Parameters  
Date\_ 20160708  
Time 9.56  
INSTRUM spect  
PROBHD 5 mm QNP 1H/13  
PULPROG zgpg30  
TD 32768  
SOLVENT CDCl3  
NS 82  
DS 2  
SWH 20325.203 Hz  
FIDRES 0.423278 Hz  
AQ 0.8861428 sec  
RG 18064  
DM 24.600 usec  
DE 9.30 usec  
TE 296.3 K  
D1 2.50000000 sec  
D11 0.08000000 sec  
DELTA 2.40000001 sec  
TDO

===== CHANNEL f1 =====  
NUC1 13C  
P1 4.20 usec  
PL1 -2.00 dB  
SFO1 75.4764278 MHz

===== CHANNEL f2 =====  
CPDPRG2 waltz16  
NUC2 1H  
PCPD2 100.00 usec  
PL2 -5.00 dB  
PL12 15.00 dB  
PL13 15.00 dB  
SFO2 300.1312005 MHz

F2 - Processing parameters  
SI 32768  
SF 75.4677468 MHz  
WDW EM  
SSB 0  
LB 1.00 Hz  
GB 0  
PC 1.40

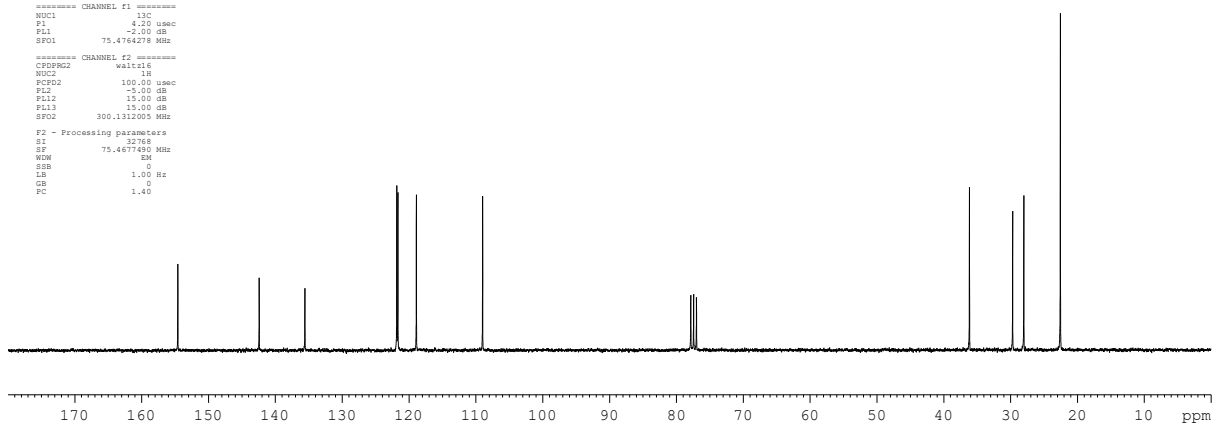

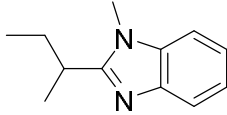

25k

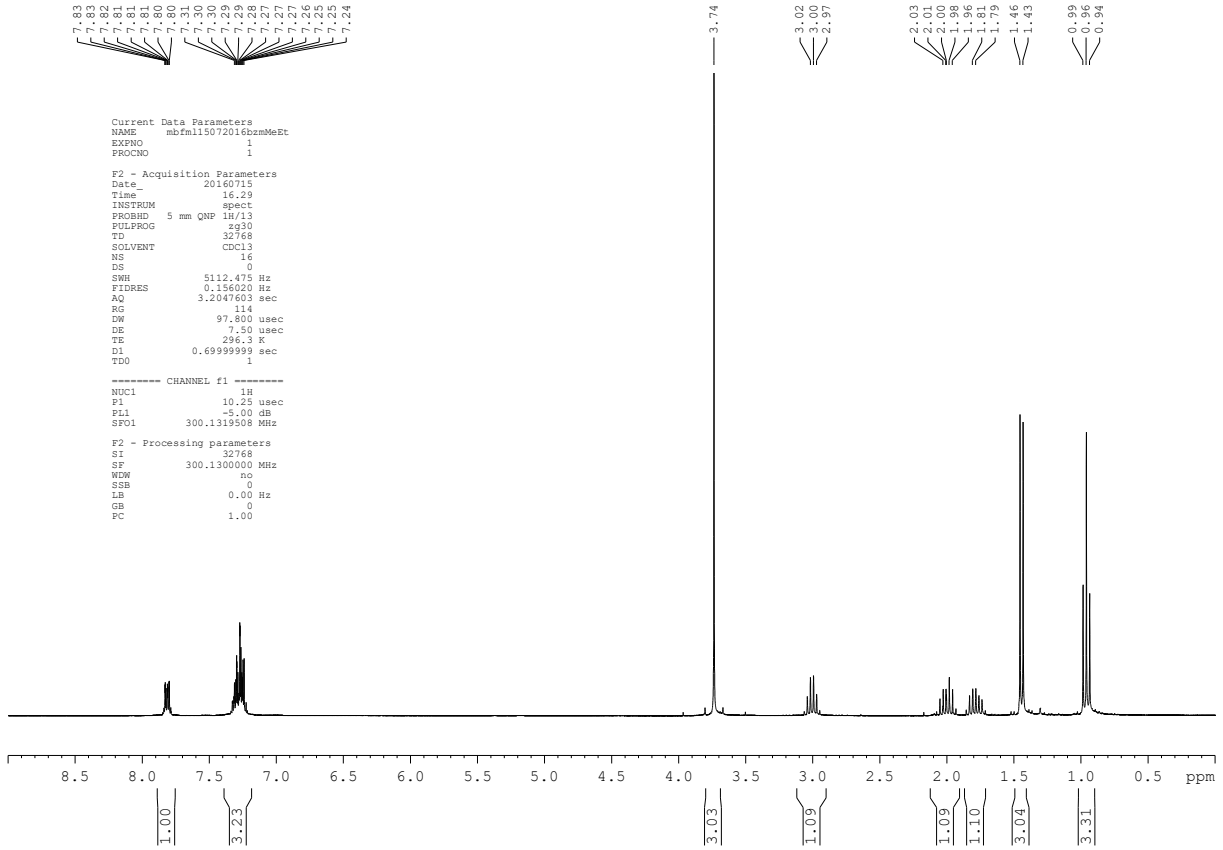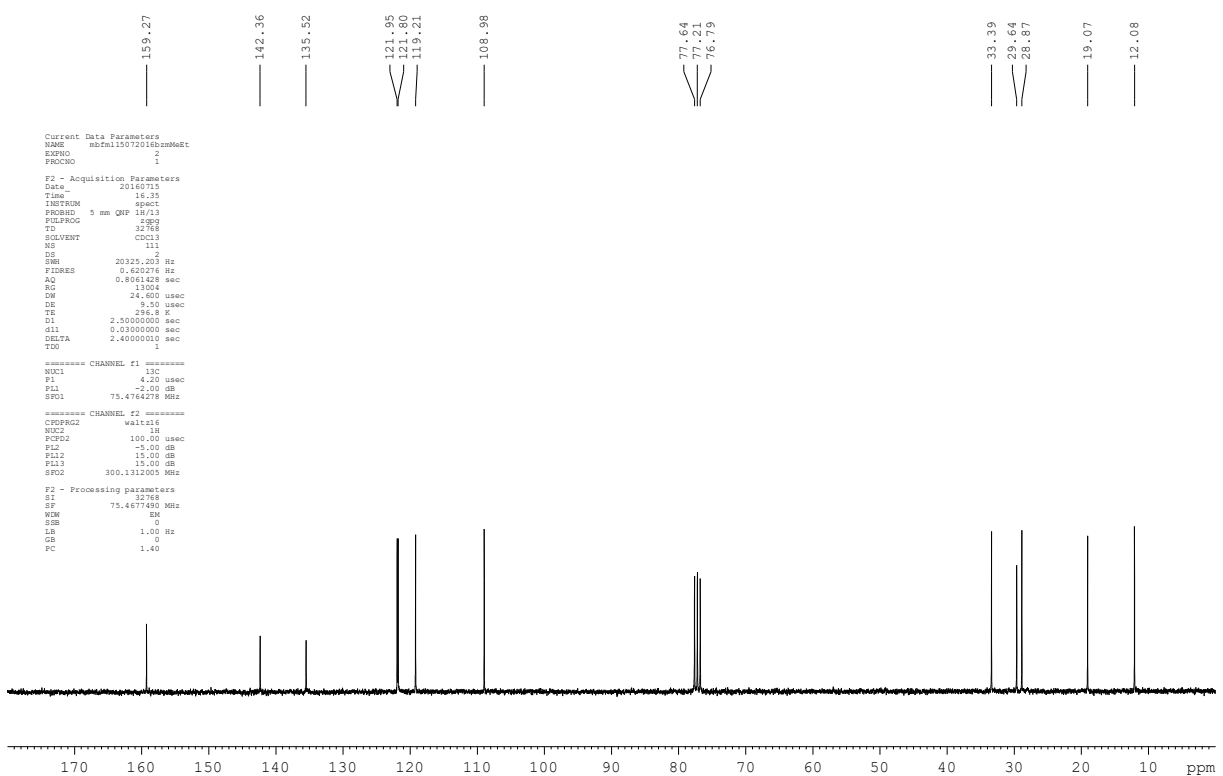

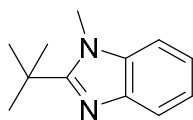

**25I**

<sup>1</sup>H NMR spectrum

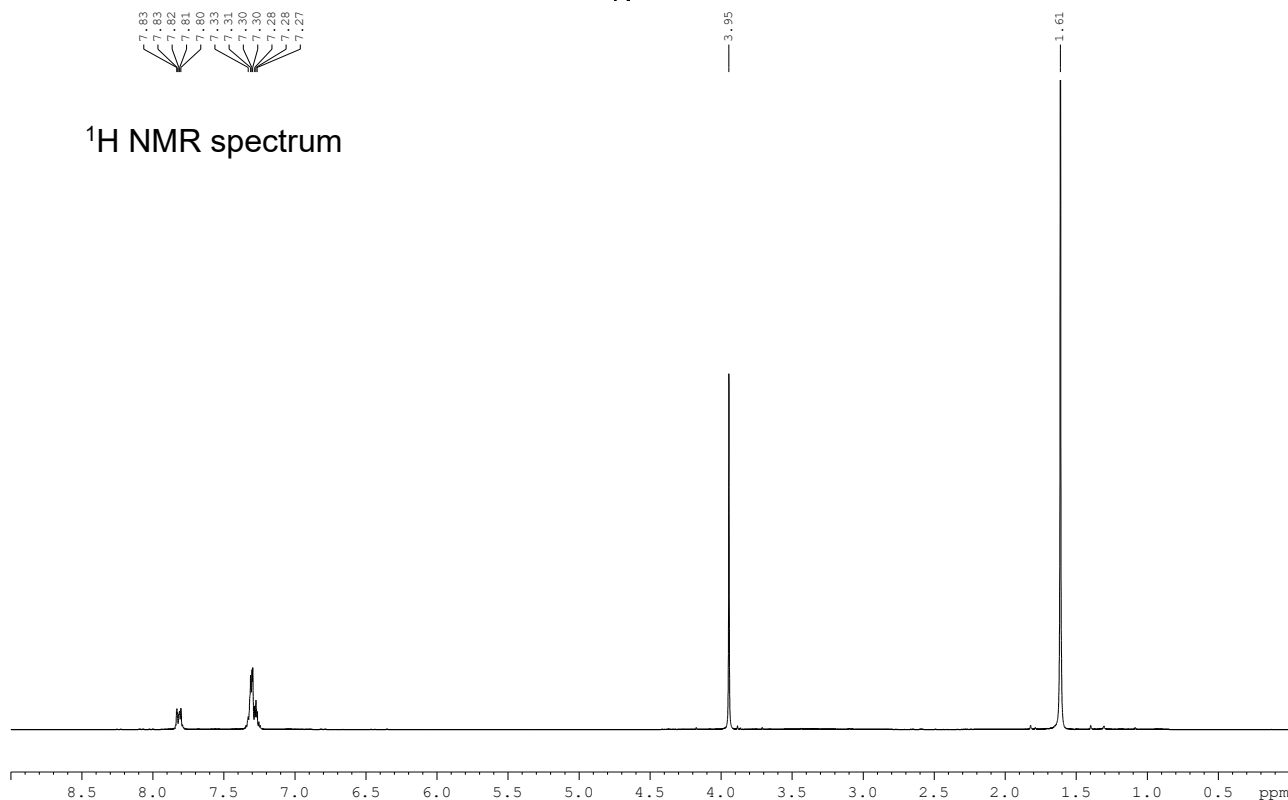

1D proton-decoupled <sup>13</sup>C NMR spectrum

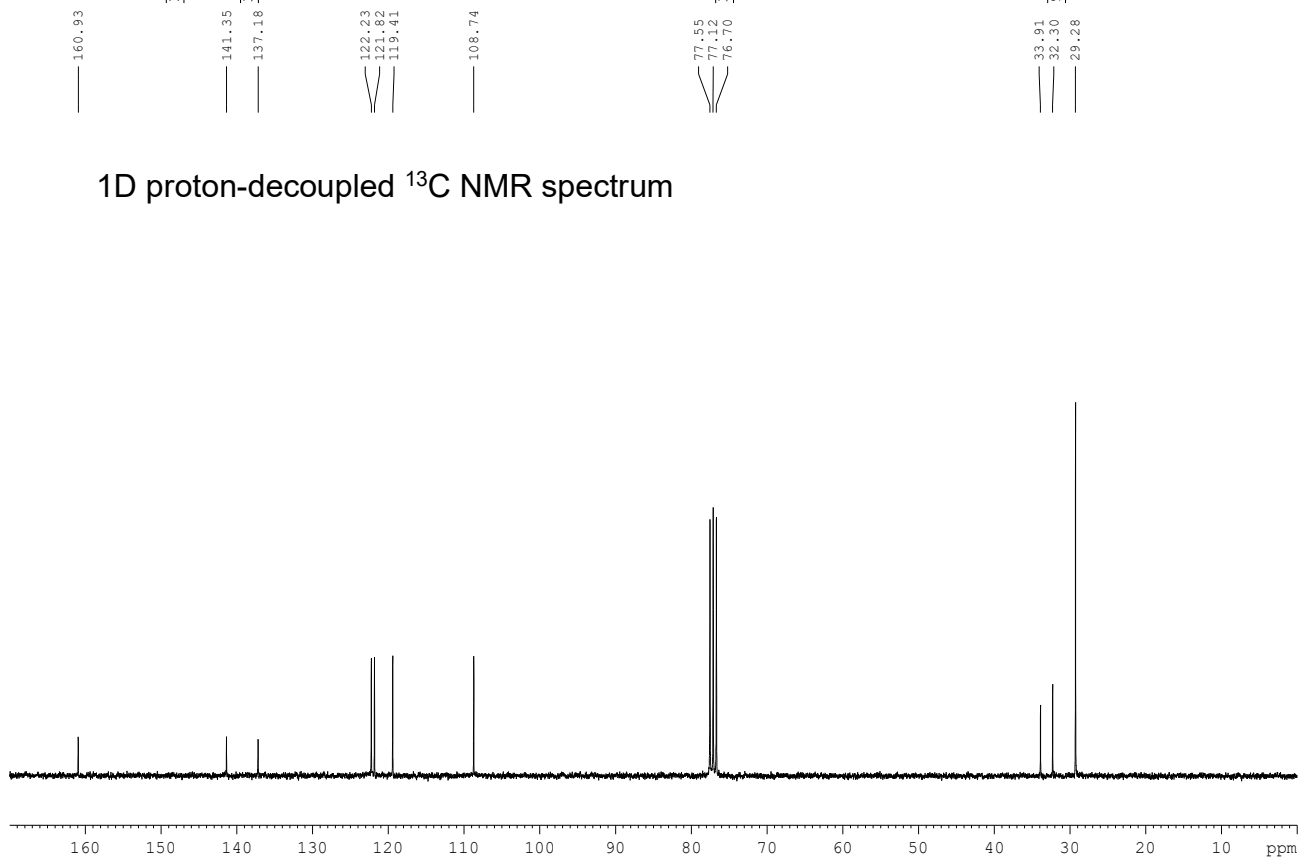

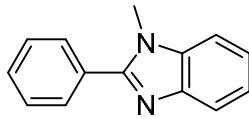

25m

7.91  
7.90  
7.89  
7.88  
7.87  
7.83  
7.82  
7.82  
7.81  
7.80  
7.80  
7.58  
7.58  
7.57  
7.57  
7.56  
7.55  
7.44  
7.43  
7.42  
7.42  
7.38  
7.38  
7.37  
7.37  
7.36  
7.35  
7.31

$^1\text{H}$  NMR spectrum

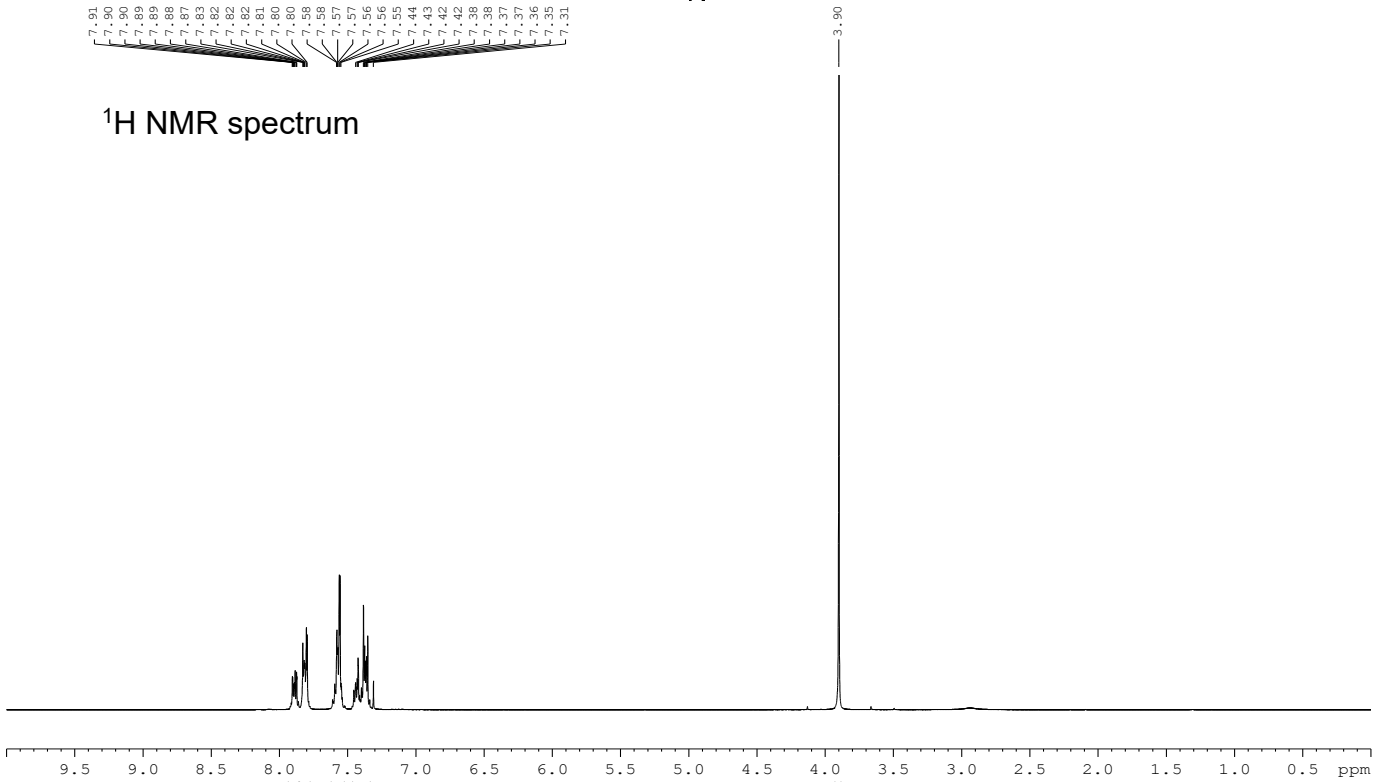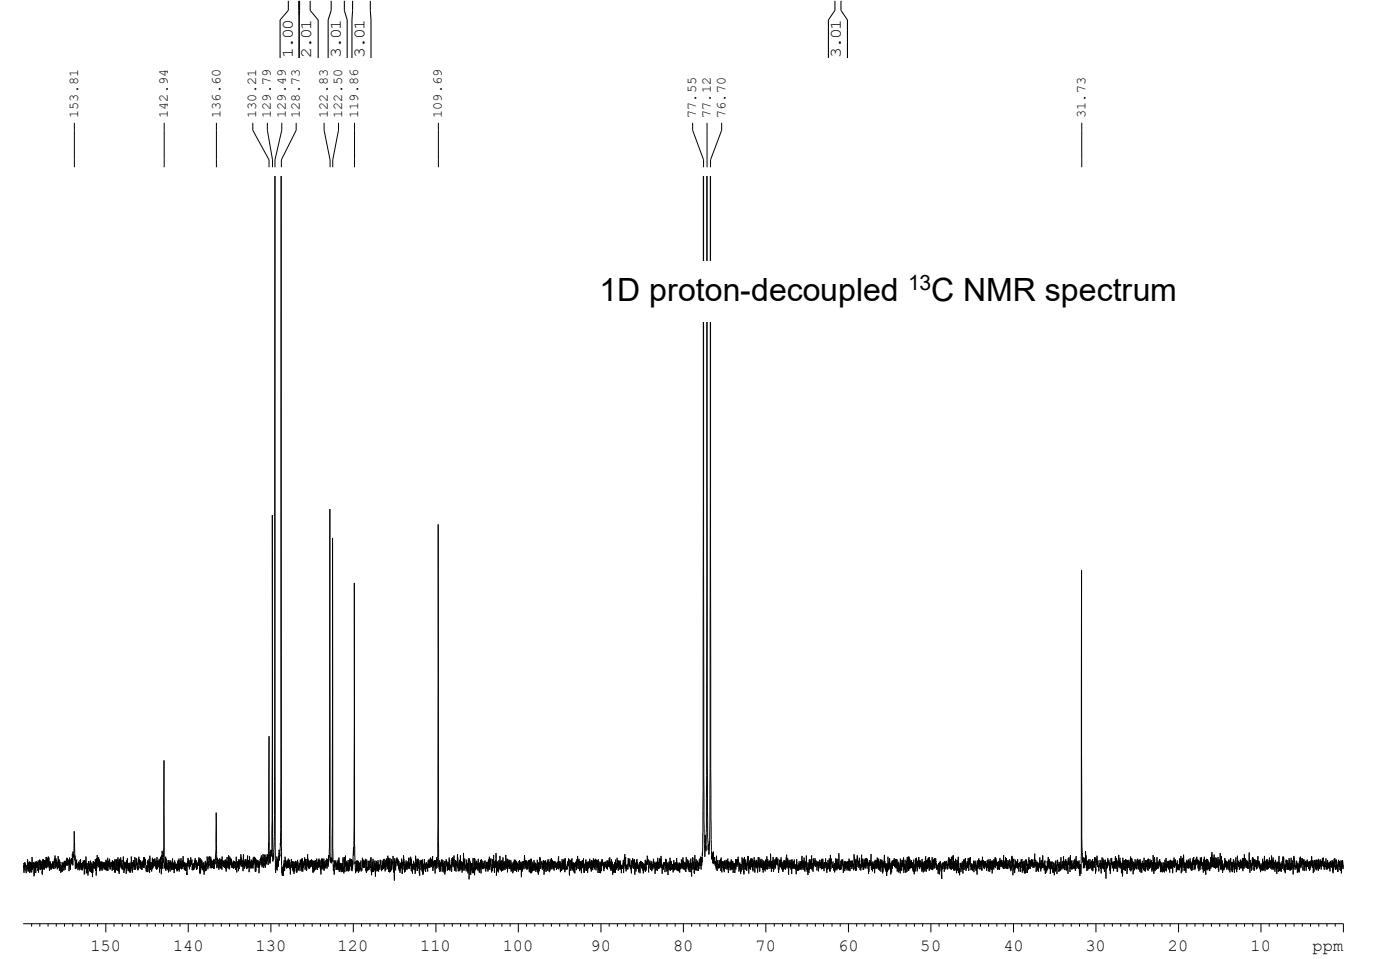

1D proton-decoupled  $^{13}\text{C}$  NMR spectrum

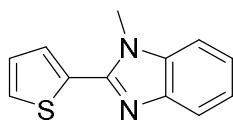

25n

<sup>1</sup>H NMR spectrum

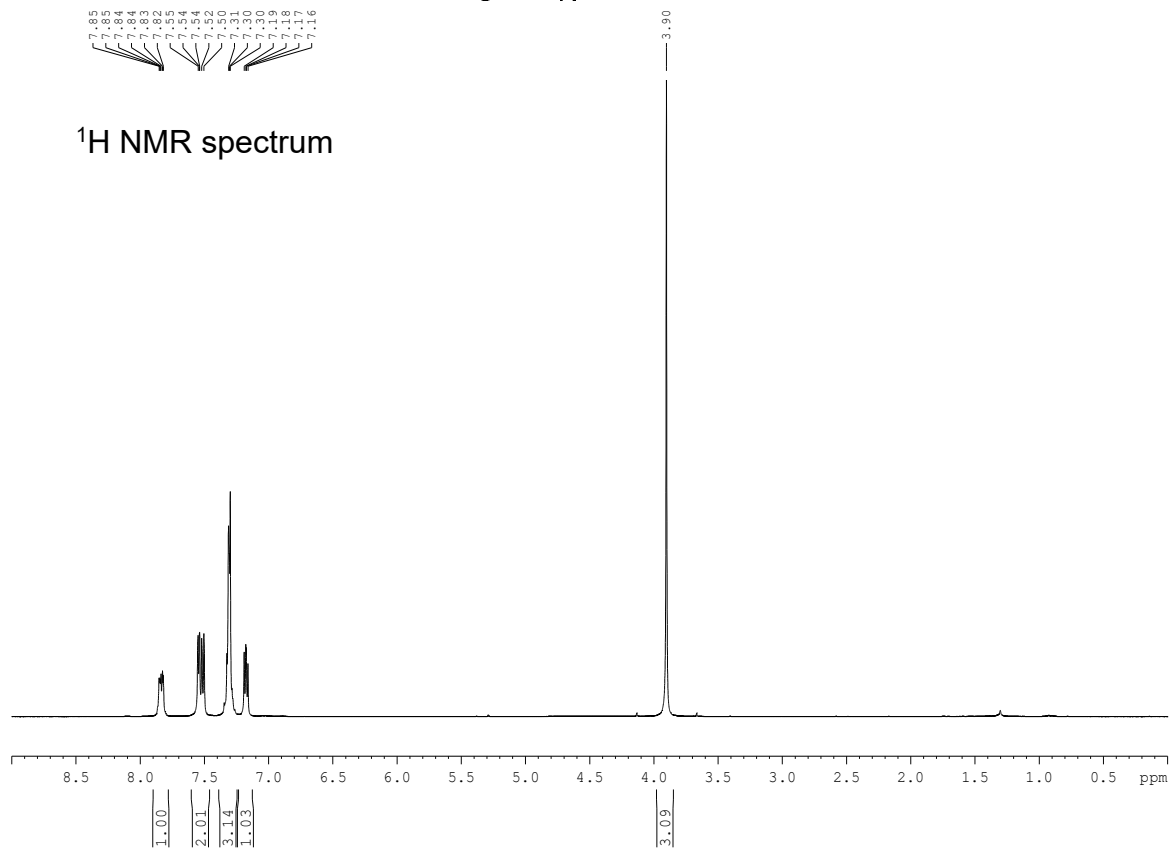

1D proton-decoupled <sup>13</sup>C NMR spectrum

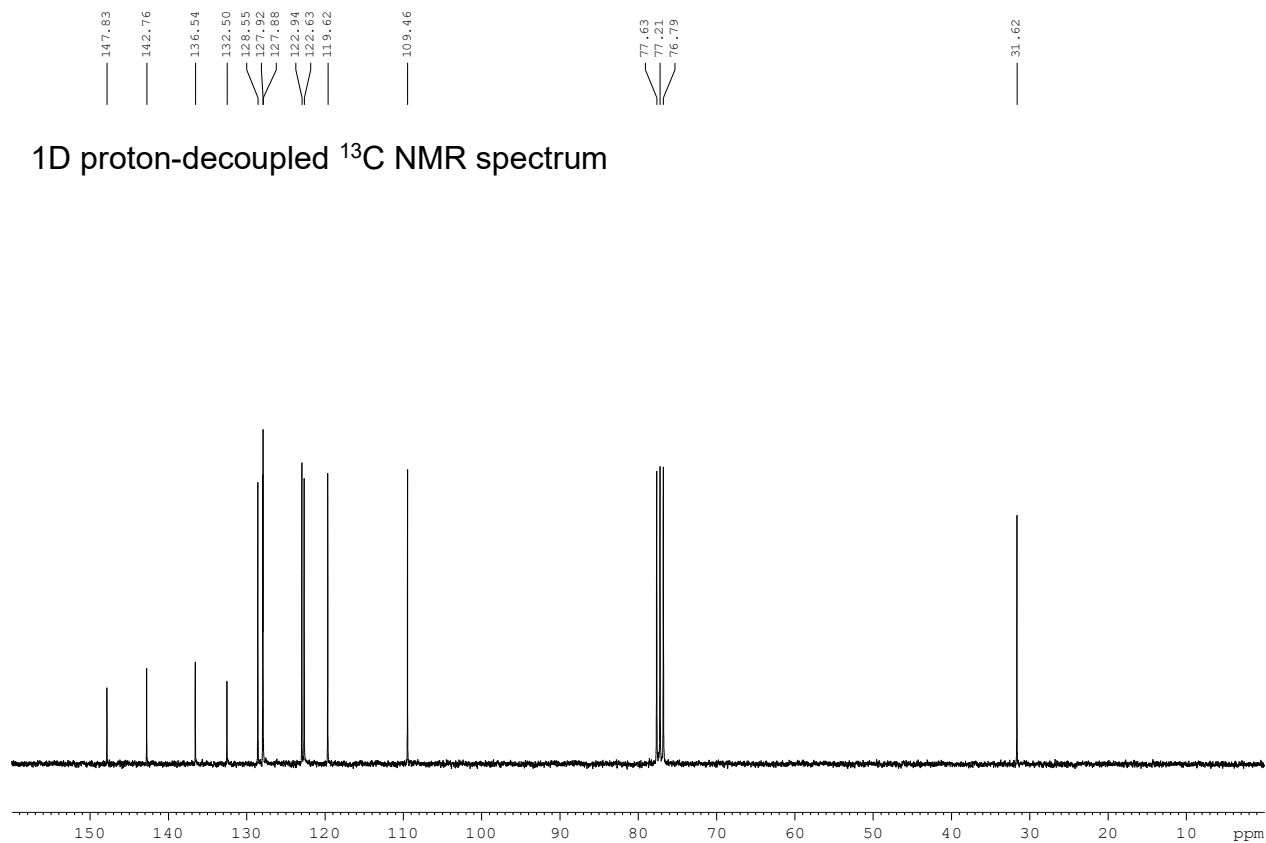



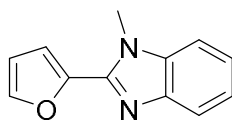

**25o**

<sup>1</sup>H NMR spectrum

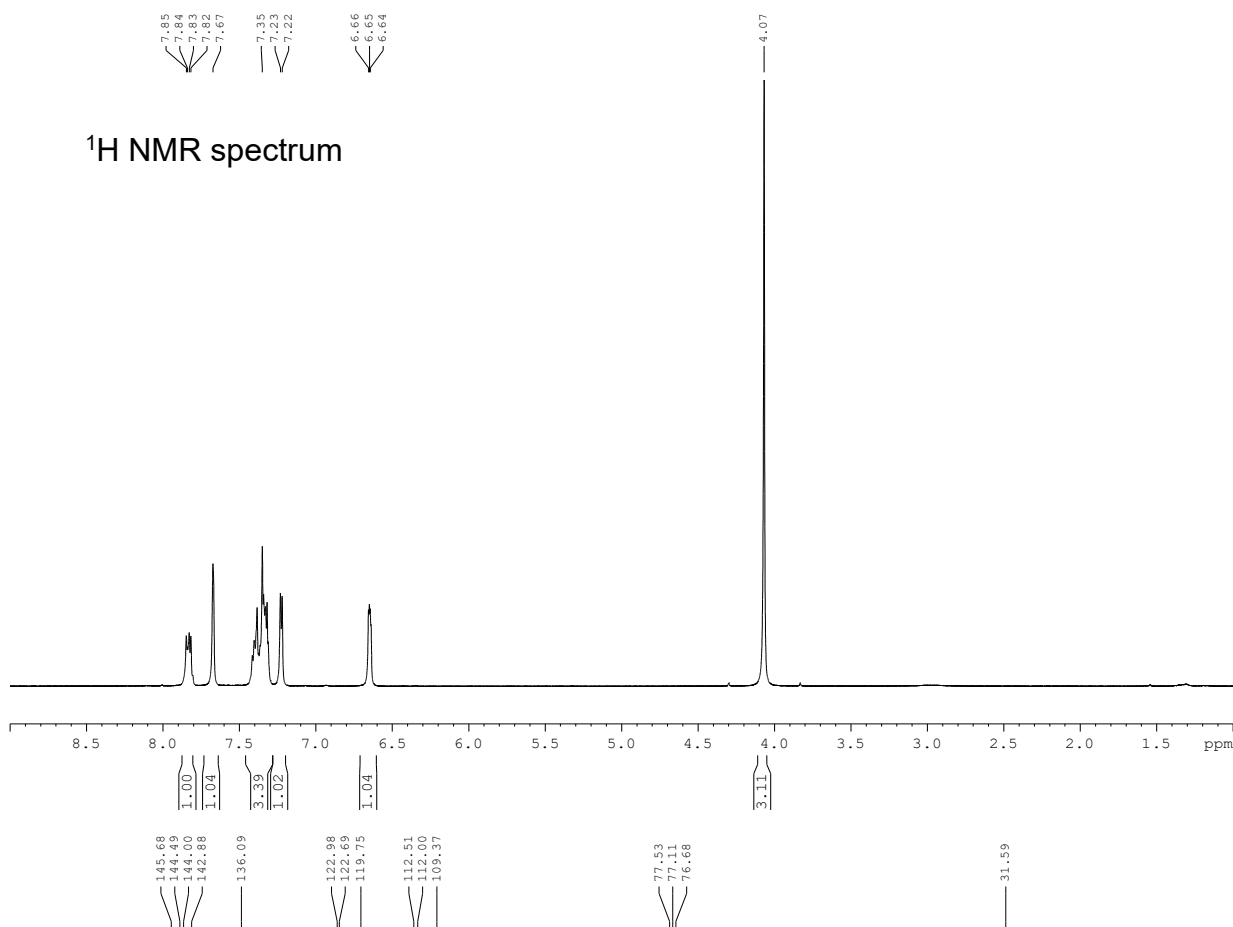

1D proton-decoupled <sup>13</sup>C NMR spectrum

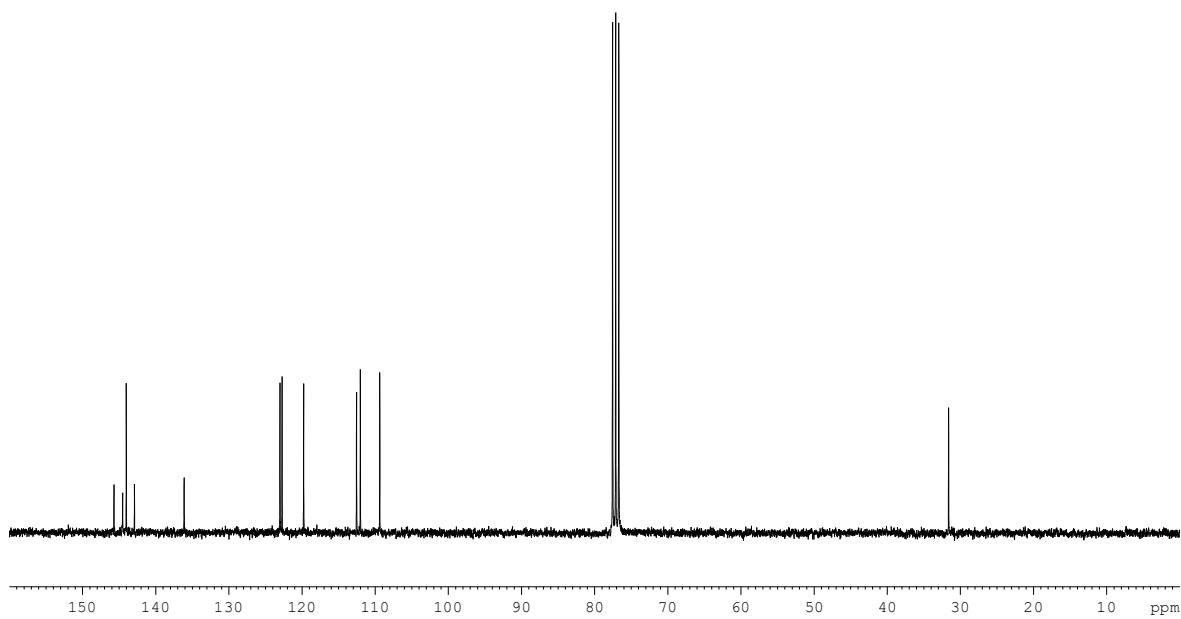

Supplement: c9gc03992a1.pdf [file c9gc03992a1.pdf]
